# Supplementary material for: Casz1 and Znf101/Zfp961 differentially regulate apolipoproteins A1 and B, alter plasma lipoproteins, and reduce atherosclerosis
Source: JCI journal article supplement (doi:10.1172/jci.insight.182260), 2025-01-08
Supplement: sd1 [file 1]

# Supplementary Fig 1

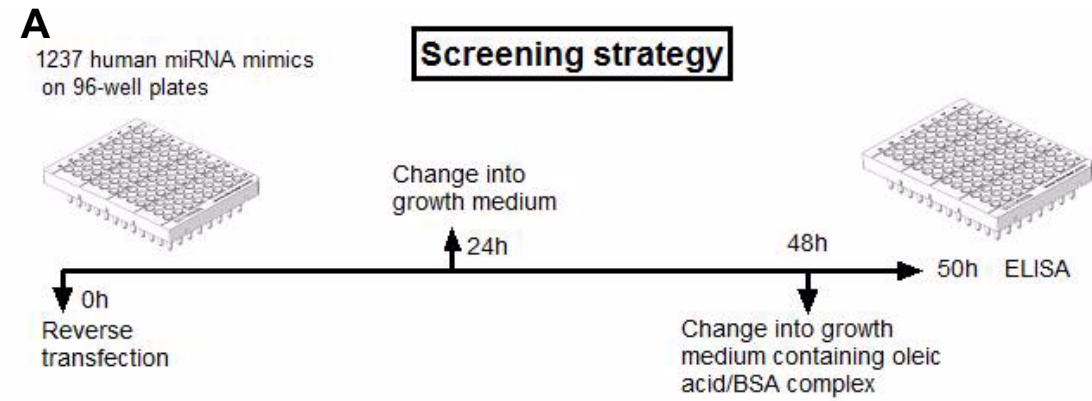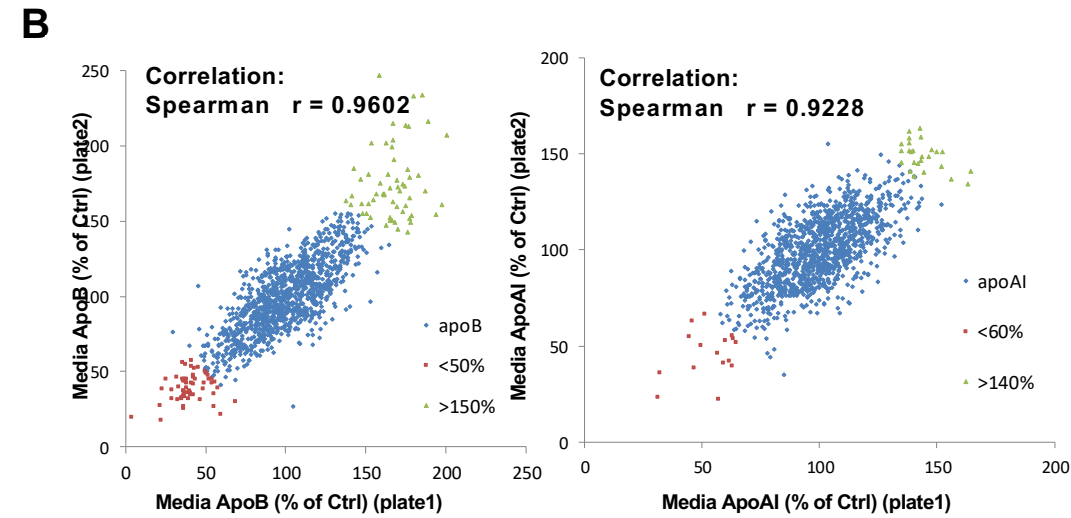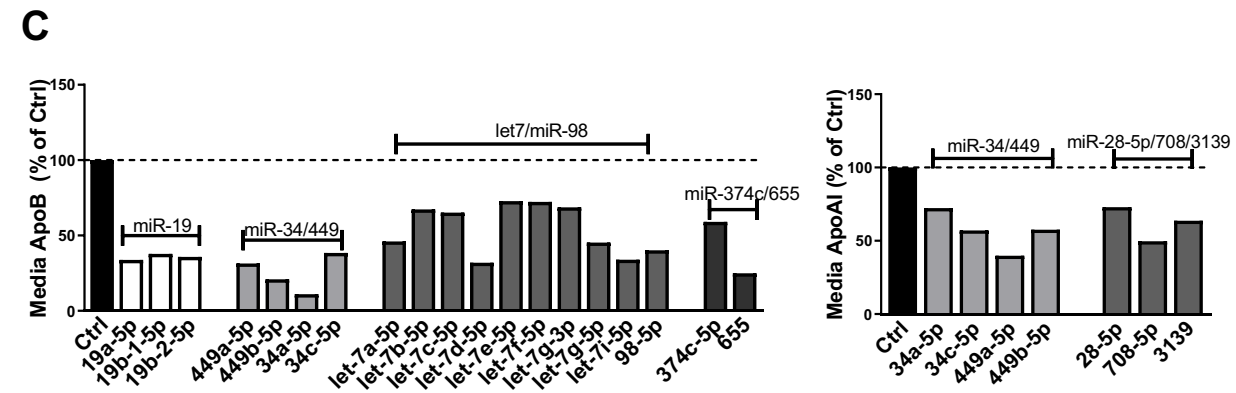

**Supplementary Fig 1. Screening a library to identify microRNAs regulating apoB and apoA1 secretion in human hepatoma Huh-7 cells.**

**(A)** Huh-7 cells were reverse transfected in duplicate plates with a human miRDIAN mimic 16.0 library (Dharmacon) of 1237 miRs at 50 nM. After 24 h, cells received complete media with 10% FBS. After another 24 h, cells were incubated with complete media containing 10% FBS and oleic acid/BSA complexes (0.4 mM/1.5%) for 2 h to avoid identification of miRs that affect posttranslational degradation of apoB. Media were used to quantify apoB and apoA1 levels by ELISA. Few wells in each plate were simultaneously transfected with negative control (Ctrl) or miR-30c (positive control, reduces apoB).

**(B)** Percentage change in media apoB and apoA1 in two plates exposed to the same miRs were compared with the negative control. Changes (%) in plate 1 are plotted against plate 2. Correlation between two plates with respect to changes in media apoB and apoA1 was determined.

**(C)** Different miR family members with the same seed sequence showed similar reductions in media apoB and apoA1 indicating internal consistency in the regulation of apoB and apoA1 secretion by family members.

# Supplementary Fig 2

## A. Media

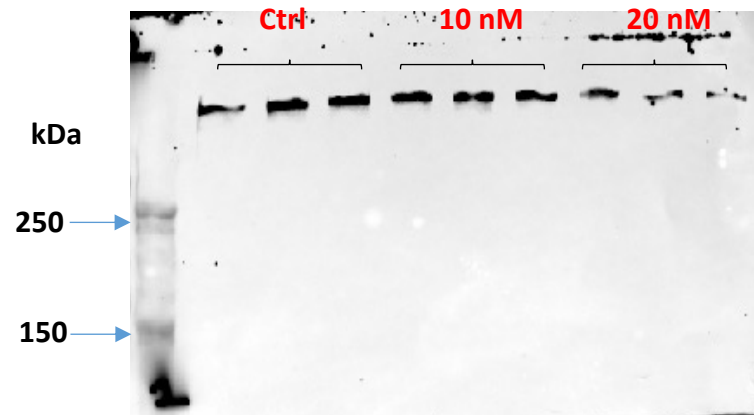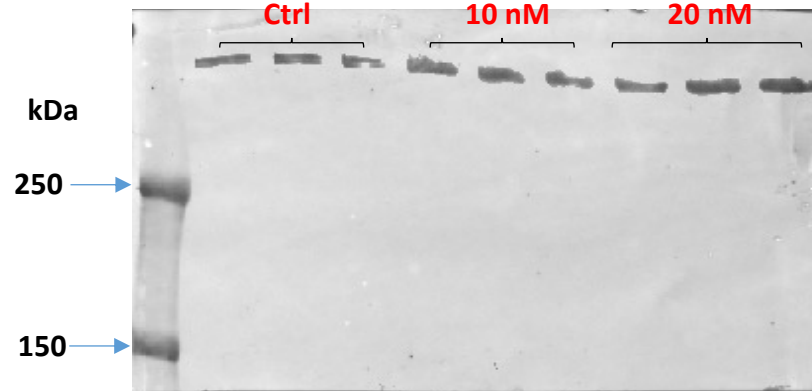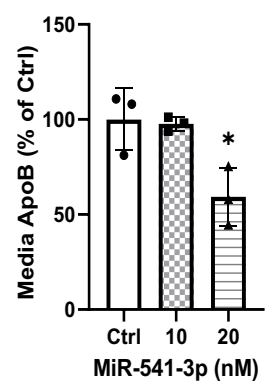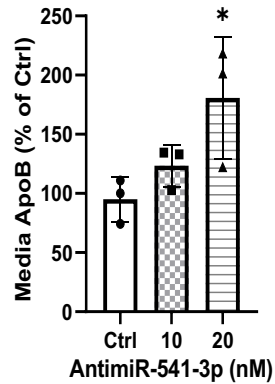

## B. Cells

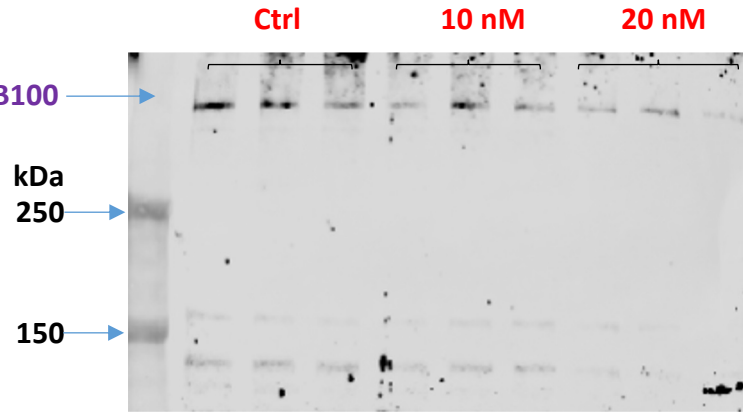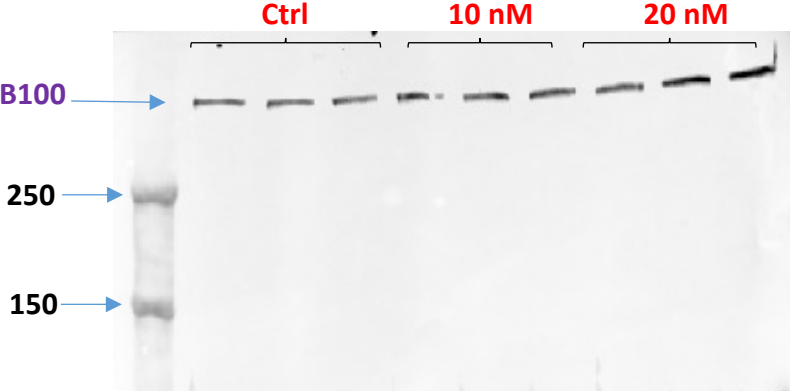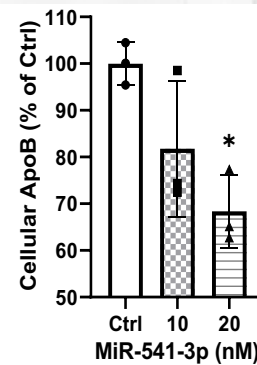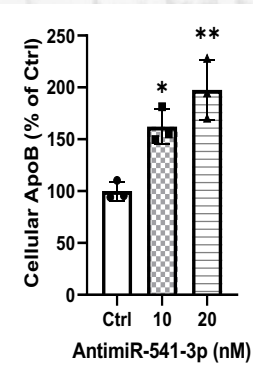

## C. Cells

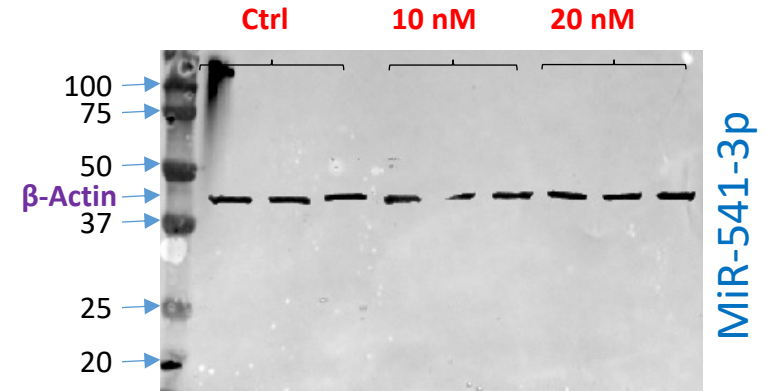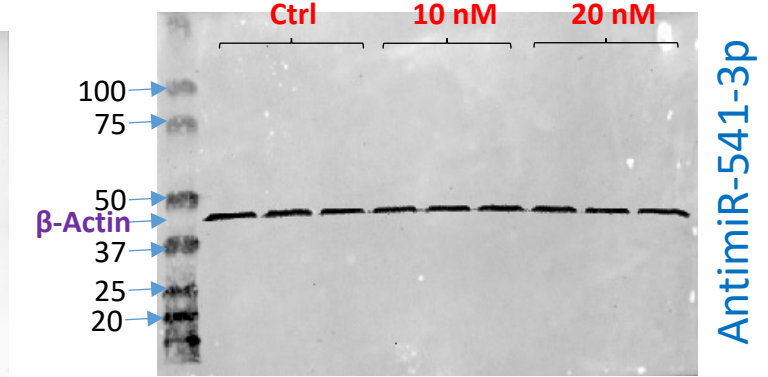

# Supplementary Fig 2

## D. Media

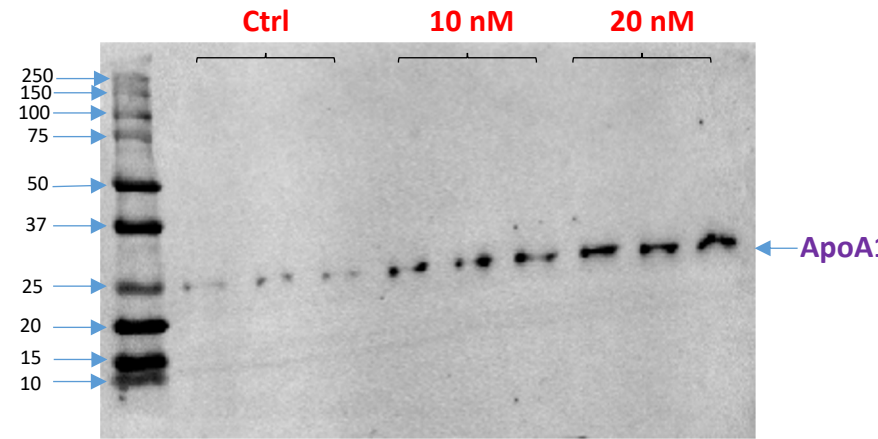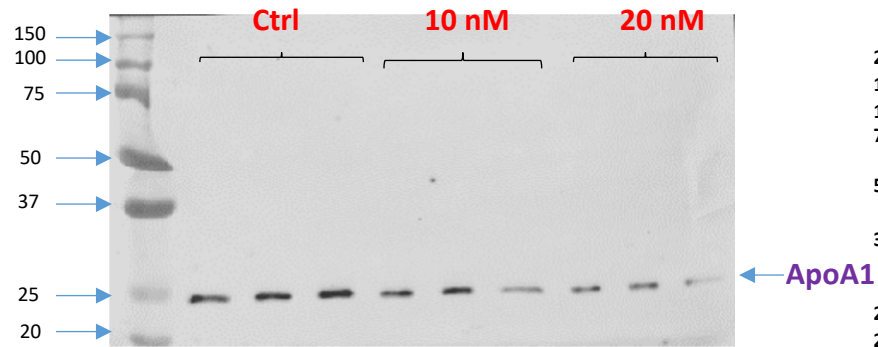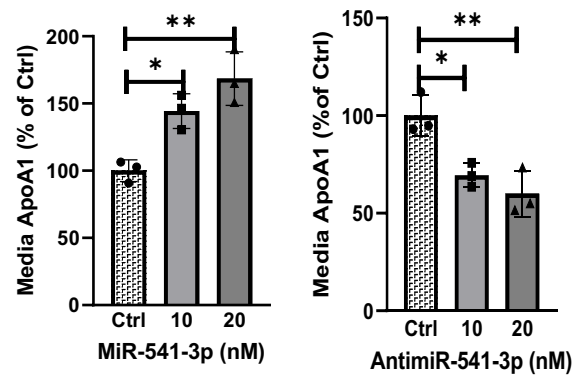

## E. Cells

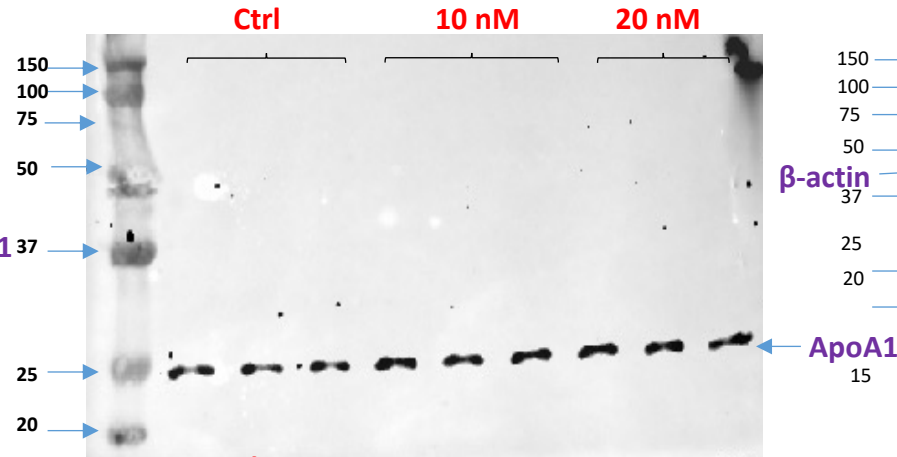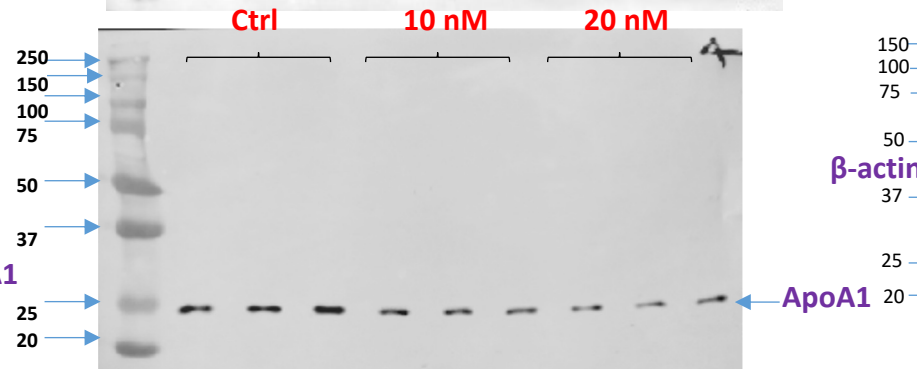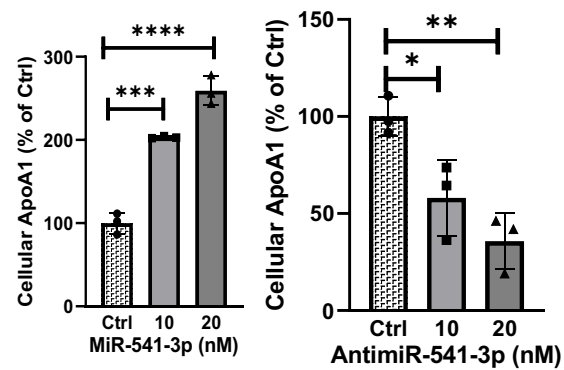

## F. Cells

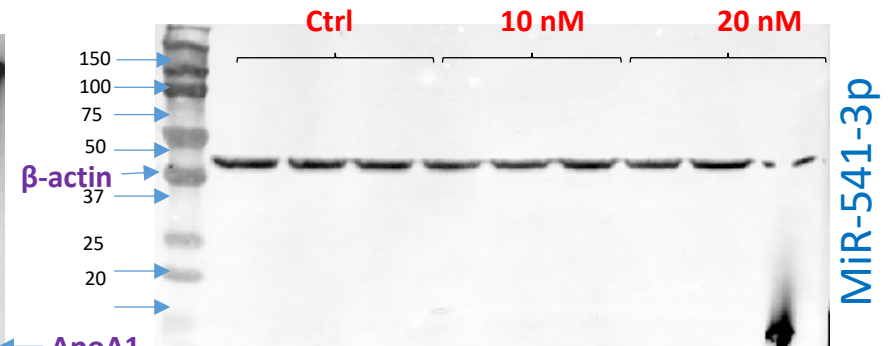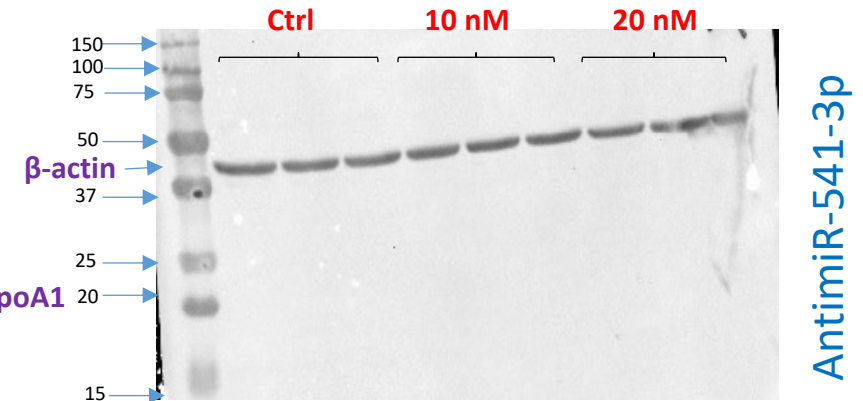

## G. mRNA

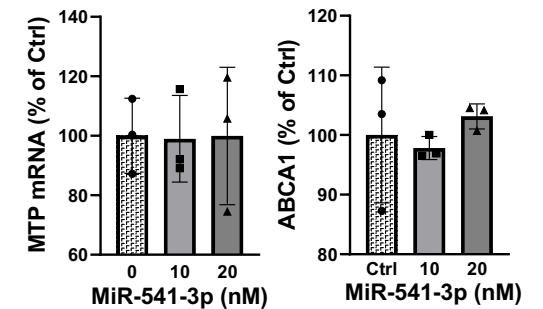

## **Supplementary Fig 2. Regulation of apoB and apoA1 by miR-541-3p.**

**(A-C)** Full gels probing apoB100 in the (A) media and (B-C) cell lysates of Huh-7 cells treated with miR-541-3p mimics (top) or antimiR-541-3p (bottom), respectively. Bands were quantified by ImageJ and plotted as % of control (bottom). The densitometric analysis showed significant reductions in apoB protein levels in cells and media of Huh-7 cells overexpressing miR-541-3p mimics and significant increases in cells overexpressing antimiR-541-3p. MiR-541-3p mimics and antimiR-541-3p had no effect on  $\beta$ -actin protein levels.

**(D-F)** Full gels and quantification of apoA1 bands in media (A) and cells (B) transfected with miR-541-3p mimics and antimiR-541-3p. Protein bands were quantified using ImageJ and normalized to  $\beta$ -actin and plotted as % of control (bottom). MiR-541-3p mimics increase whereas antimiR-541-3p decreases apoA1 expression.

**(G)** Quantification of *MTP* and *ABCA1* mRNA levels in Huh-7 cells transfected with different amounts of miR-541-3p mimics.

# Supplementary Fig 3

**A**

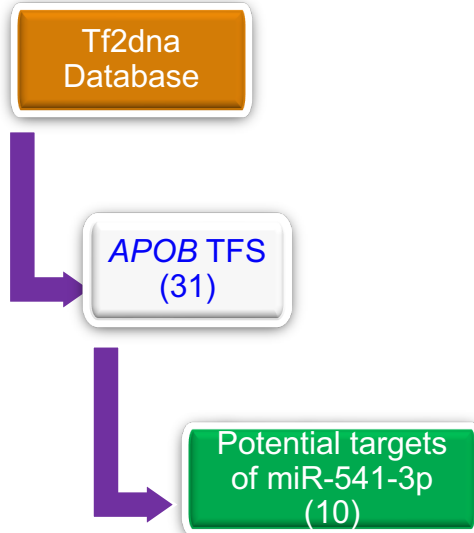

**B**

| Expression of TFs Regulating ApoB in Huh-7 cells |               |
|--------------------------------------------------|---------------|
| Expressed                                        | Not expressed |
| ZNF101                                           | ZNF442        |
| MAFK                                             | ZSCAN22       |
| NFATC3                                           | ZNF746        |
| RELA                                             |               |
| ZNF275                                           |               |
| ELK4                                             |               |
| HSF1                                             |               |

**C**

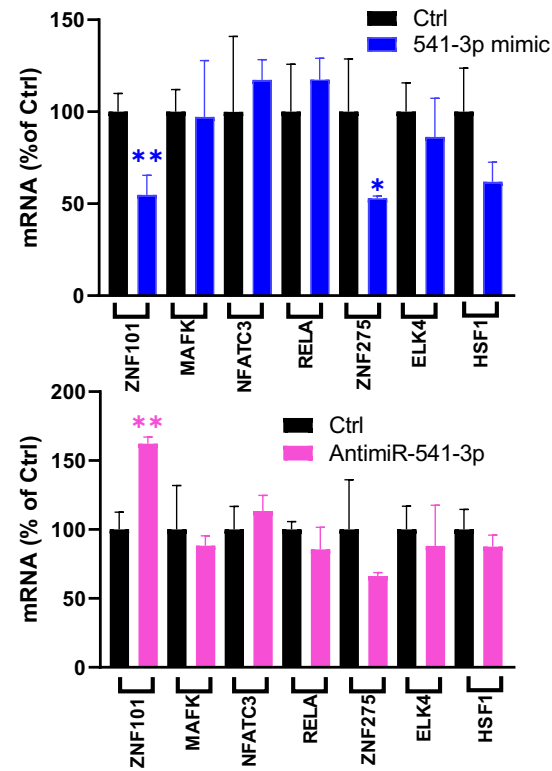

**D**

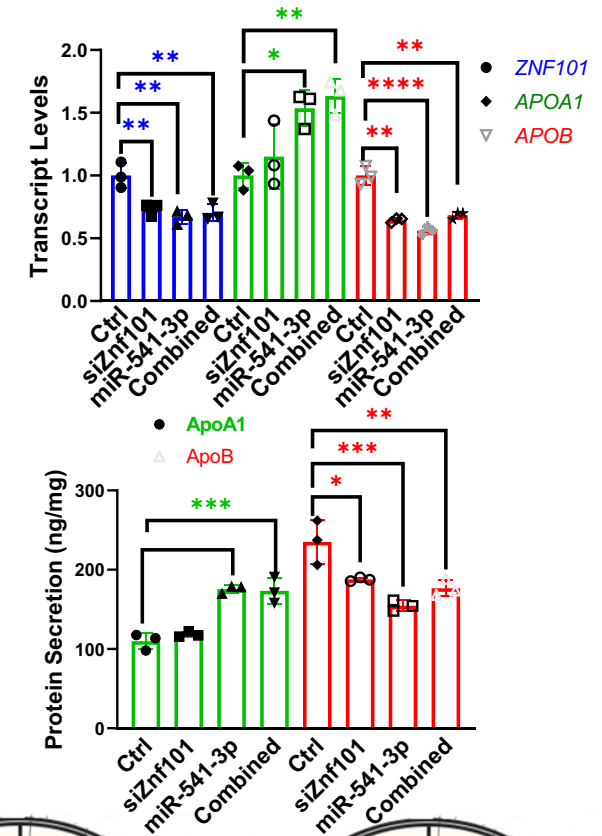

**E**

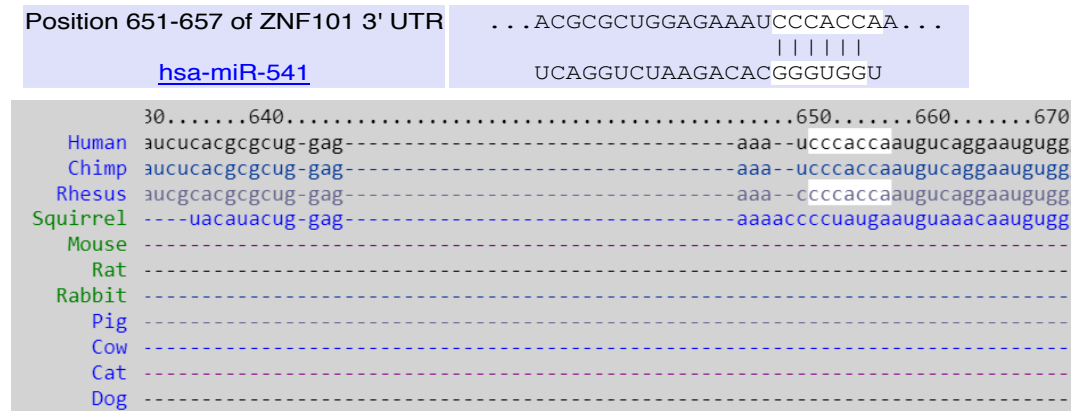

**F**

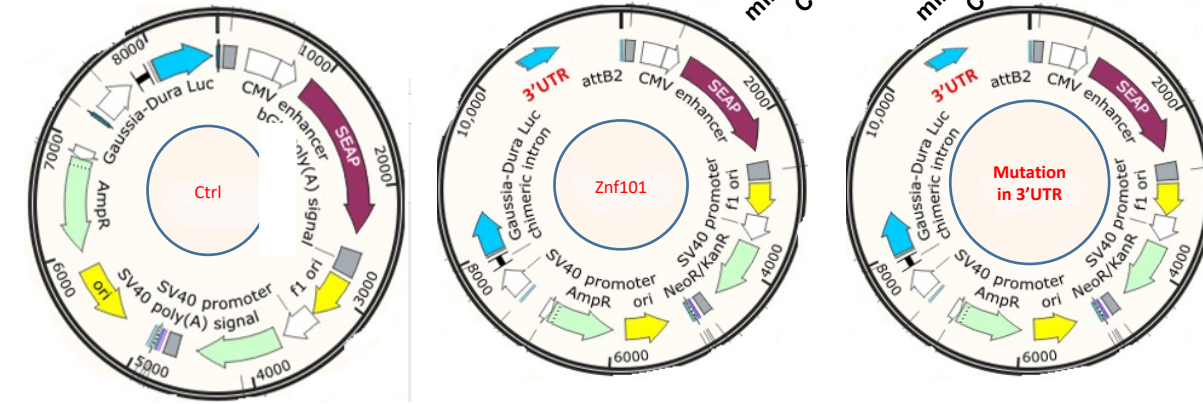

**G**

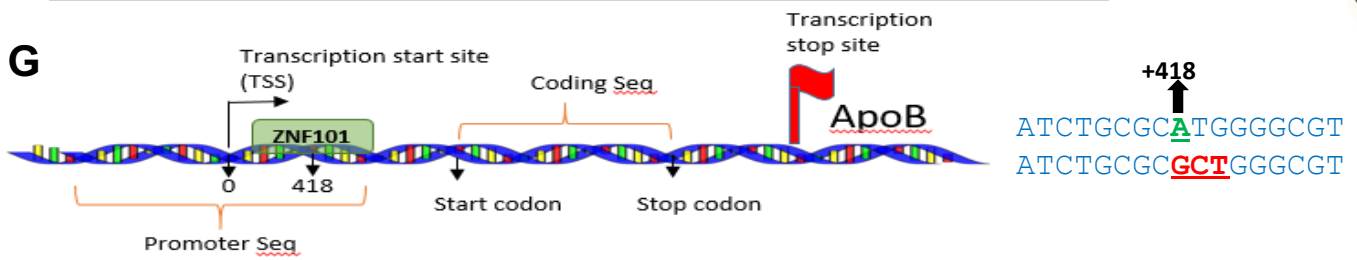

**Mutations in the seed complementary sequence of 3'-UTR of ZNF101**  
 5' CCCACCA 3'- ZNF101 sequence  
 5' CCCACAT 3'- Mutated (red) ZNF101 sequence

### **Supplementary Fig 3. Identification of transcription factors (TFs) regulating apoB.**

- (A)** Tf2dna database was queried for TFs that could potentially regulate *APOB* gene expression. This identified 31 potential TFs that could regulate *APOB* expression. Ten of these TFs were identified as targets of miR-541-3p using Target Scan.
- (B)** Transcript levels of these 10 TFs were quantified in triplicate using specific primers. Seven TFs could be measured in Huh-7 cells.
- (C)** Huh-7 cells were transfected in triplicate with 20 nM miR-541-3p or antimiR-541-3p. After 48 h, changes in mRNA levels were quantified. Znf101 significantly reduced or increased, respectively, in cells transfected with miR-541-3p mimics or antimiR-541-3p.
- (D)** Huh-7 cells were transfected with miR-541-3p mimics (20 nM) or siZnf101 (28 nM), alone or in combination. After 48 h, cell lysates were used to measure different mRNA levels (left). Conditioned media was used to quantify apoB and apoA1 levels by ELISA (right).
- (E)** Target Scan predicted that the 3'-UTR of ZNF101 mRNA contains complementary bases that could pair with miR-541-3p seed sequence (top). Target Scan was used to determine the conservation of Znf101 3'-UTR in different species. Conserved sequences were found in the rhesus monkey and chimpanzee (bottom).
- (F)** Schematic diagrams of plasmids expressing Gaussia-Dura luciferase under the control of Znf101 3'-UTR obtained from Genecopoeia. The plasmid also constitutively expresses alkaline phosphatase under the control of cytomegalovirus (CMV) promoter and is used as a control. The highlighted bases were mutated in the wild-type plasmid.
- (G)** Schematic diagram showing potential Znf101 binding site in the *APOB* promoter. Transcription start site (TSS) and stop sites are identified. *APOB* promoter and coding sequences (seq) are shown (not to scale). Potential Znf101 binding site was mutated as shown in red.

# Supplementary Fig 4

**A**

Tf2dna Database

TFs of APOA1 (59)

Potential targets of miR-541-3p (18)

**B**

| Expression of TFs regulating ApoA1 in Huh-7 cells |               |
|---------------------------------------------------|---------------|
| Expressed                                         | Not expressed |
| HNF4A                                             | SP6           |
| ZBTB4                                             | ZNF81         |
| IRF3                                              | FOX11         |
| ZNF100                                            | ONECUT3       |
| THRB                                              | ZNF418        |
| RARA                                              |               |
| NR4A3                                             |               |
| ZSCAN16                                           |               |
| ZNF726                                            |               |
| ZNF471                                            |               |
| YY1                                               |               |
| CASZ1                                             |               |
| ZNF771                                            |               |

**C**

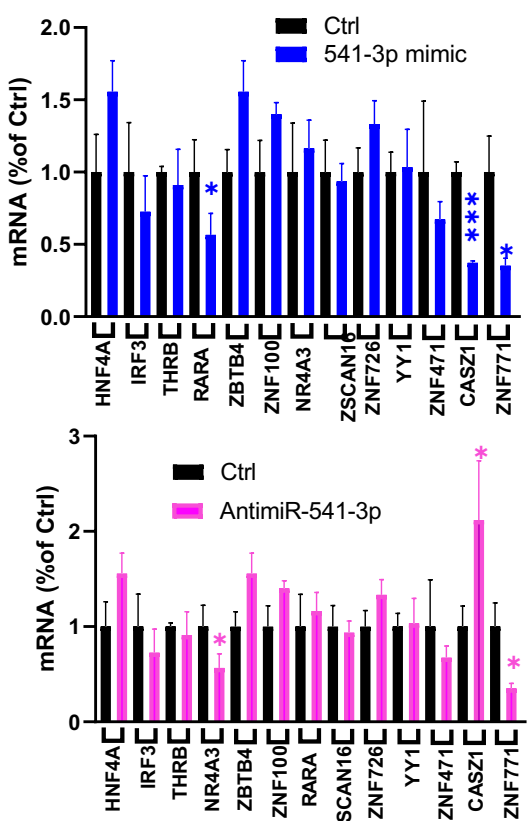

**D**

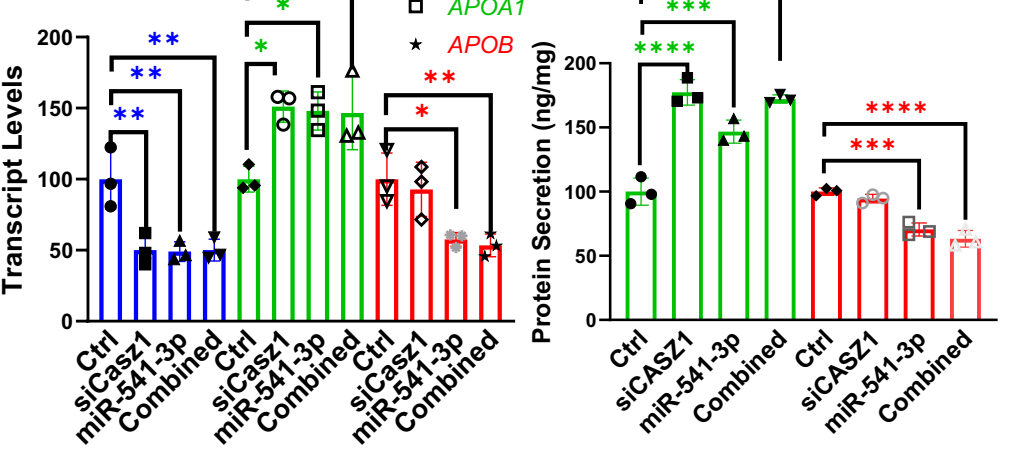

**E**

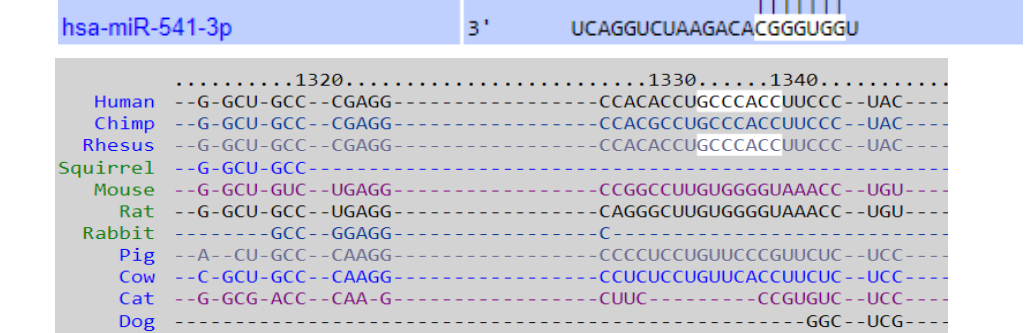

**F**

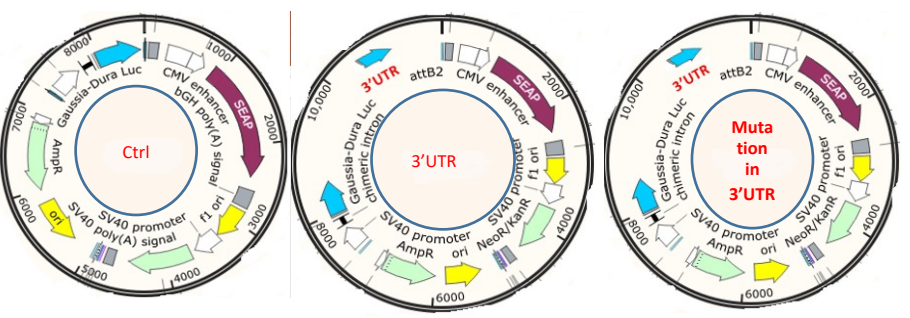

Mutations in the seed complementary sequence 3'-UTR of Casz1:

5' GCCCACC 3'- CASZ1 sequence

5' GCAATCC 3' Mutated (red) CASZ1 sequence

**G**

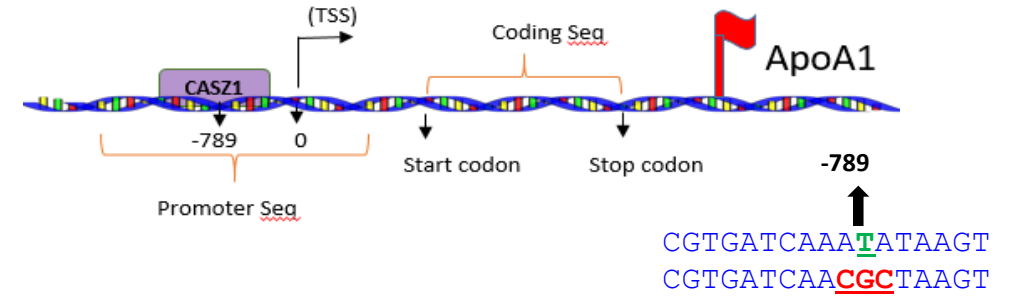

#### **Supplementary Fig 4. Identification of TFs regulating apoA1.**

**(A)** Tf2dna database was searched for TFs that could regulate *APOA1* gene expression. This identified 59 potential TFs. Target Scan predicted 18 of these TFs to be targets of miR-541-3p.

**(B)** mRNA levels of these TFs were quantified in triplicate by qRT-PCR. Huh-7 cells express 13 of these TFs.

**(C)** Huh-7 cells were transfected with 20 nM miR-541-3p mimics or antimiR-541-3p. After 48 h, changes in mRNA levels of different TFs were quantified in triplicate. *Casz1* was significantly decreased and increased, respectively, in cells expressing miR-541-3p mimics or antimiR-541-3p.

**(D)** Huh-7 cells were transfected in triplicate with miR-541-3p mimics (20 nM) or si*Casz1* (28 nM), alone or in combination. After 48 h, mRNA levels were quantified in cells (left), and protein levels in conditioned media (right) in triplicate. MiR-541-3p mimics and si*Casz1*, individually and combined, increased apoA1 levels to a similar extent indicating that they are in the same pathway.

**(E)** Target Scan 7.2 showed that *Casz1* 3'-UTR contains a complementary sequence that could base pair with miR-541-3p seed sequence (top). Clustal W alignment algorithms indicated conservation of the miR-541-3p complementary binding sequence in the 3'-UTR of *Casz1* in primates (bottom).

**(F)** Plasmids expressing luciferase with *Casz1* 3'-UTR were obtained from Genecopoeia. *Casz1* 3'-UTR was mutated as shown below in red.

**(G)** Schematic diagram showing potential *Casz1* binding site in the *APOA1* promoter (not to scale). Potential binding site sequence was mutated as shown in red.

# Supplementary Fig 5

## A. LOCUS MIR541 - HDL-cholesterol (Pan-UK-Biobank)

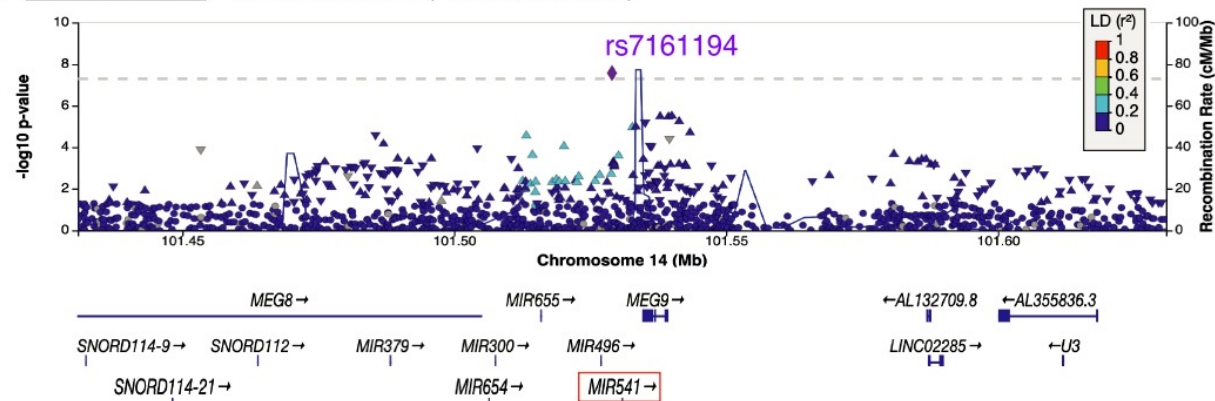

### Association of rs7161194-G allele with plasma lipids

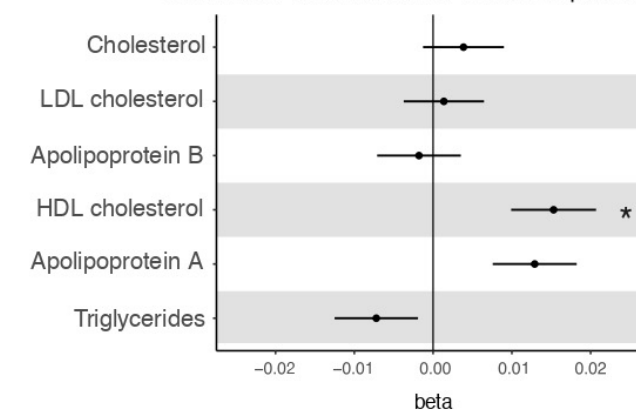

## B. LOCUS CASZ1 - Total-cholesterol (Pan-UK-Biobank)

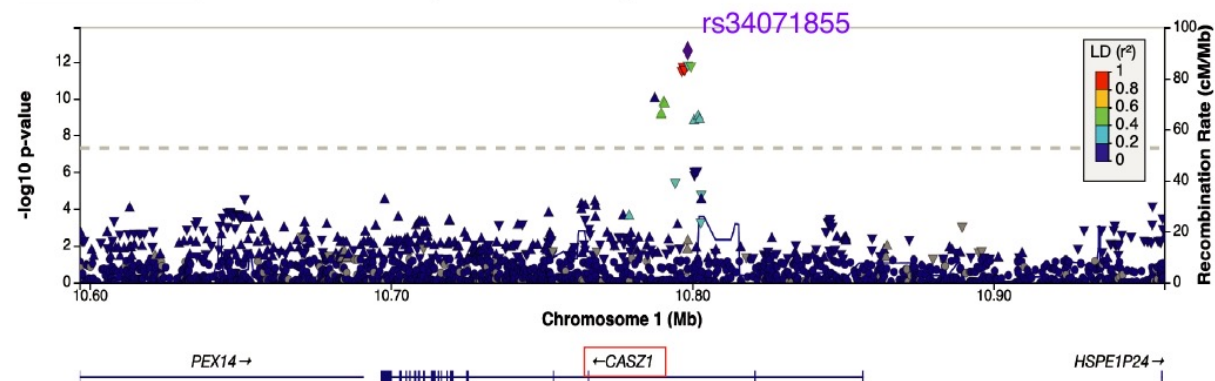

### Association of rs34071855-G allele with plasma lipids

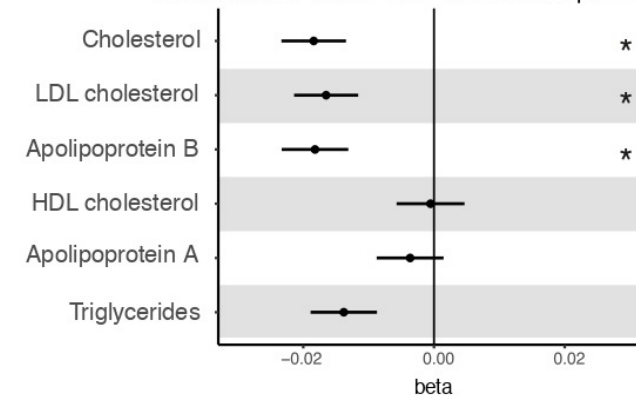

## C. LOCUS ZNF101 - Total-cholesterol (Pan-UK-Biobank)

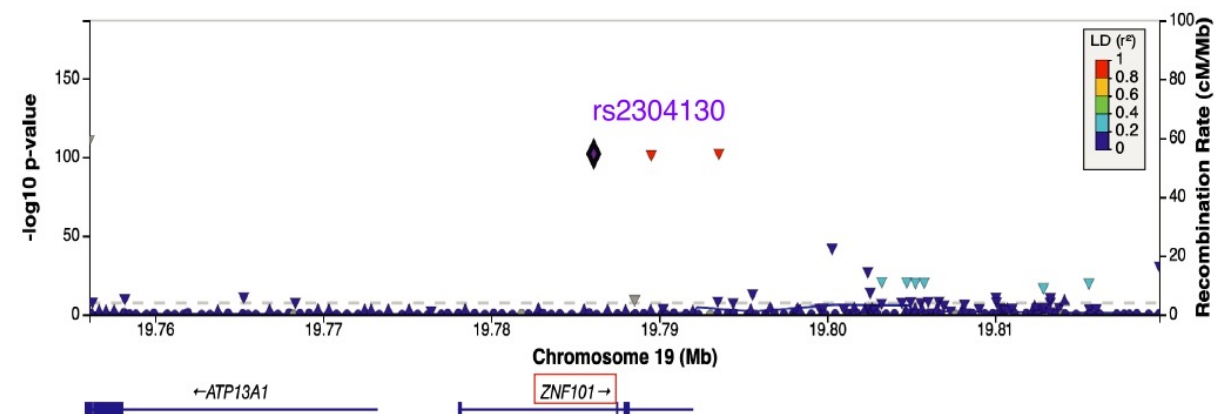

### Association of rs2304130-G allele with plasma lipids

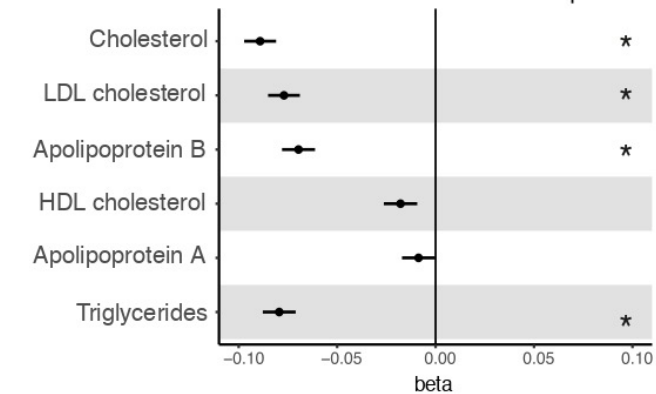

# Supplementary Fig 5

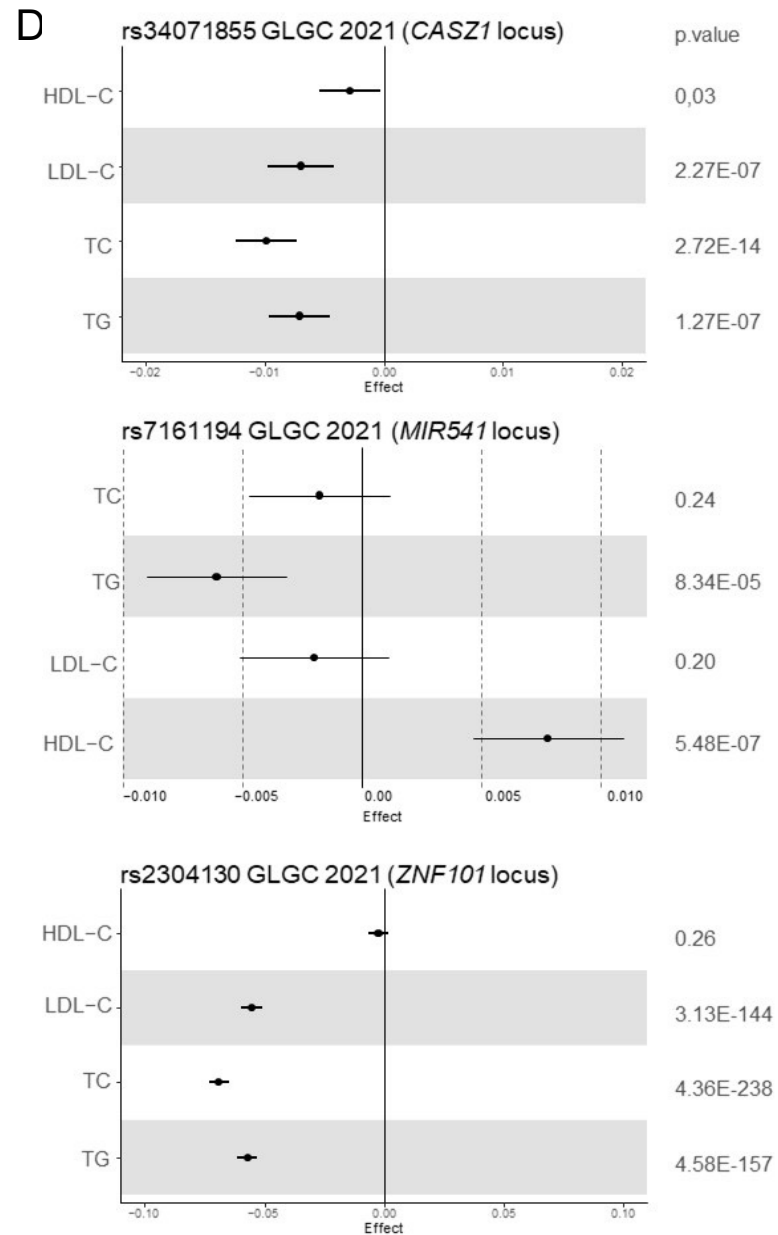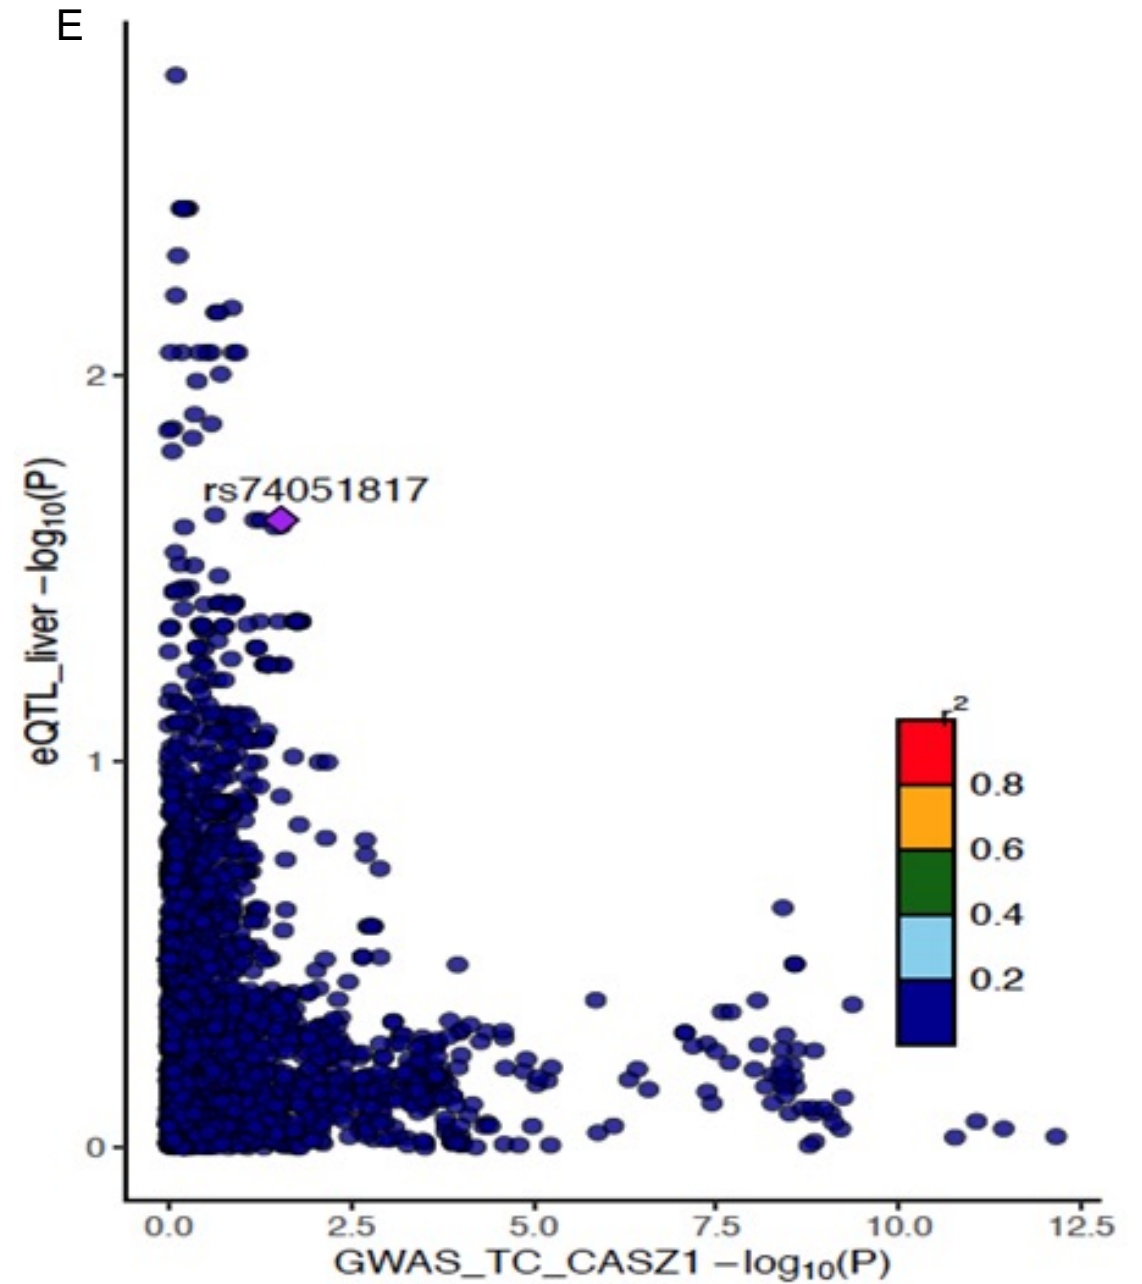

**Supplementary Fig 5. Genome wide associations of variants in the *MIR541*, *CASZ1*, and *ZNF101* loci with plasma lipids and lipoproteins.**

**(A-C)** Association results for SNPs ( $-\log_{10}$  P value, y-axis) as a function of genomic coordinates using human gene version 19 (hg19) for (A) *MIR541*, (B) *CASZ1*, and (C) *ZNF101* gene loci with plasma total cholesterol, LDL, apoB, HDL-C, apoA1, and triglycerides in the UK Biobank using the Pan-UKB project summary statistics. The bottom panel shows genes at each locus, as annotated in the UCSC Genome Browser. The most highly associated SNPs are represented as purple diamonds, and the linkage disequilibrium (LD) values (1000 Genomes data) are in the inset. Light blue dotted lines indicate estimated recombination hotspots. Forrest plots (right panels) show the associations ( $\beta \pm$  standard error) of the top associated SNP with plasma lipids and apolipoproteins levels. (\*) Correspond to genome wide significant p-values ( $p < 5.0E-08$ ). Raw data are presented in Supplemental Table 3.

**(D-E)** (D) Forrest plots show the associations ( $\beta \pm$  standard error) of the top associated SNP with plasma lipids and apolipoproteins levels in GLGC. (E) LocusCompare plot shows the relationship between SNPs in the *CASZ1* locus ( $\pm 100$ kb) and their association with total cholesterol plasma levels in the x-axis with the gene expression of *CASZ1* in the liver (eQTL\_liver- $\log_{10}(P)$  from GTEx dataset V7) in the y-axis.

# Supplementary Fig 6

**A**

Seed

Hsa-miR-541-3p: 3' UCAGGU CUAAGACACGGGUGGU 5'

Mmu-miR-541-3p: 3' UCAUACCUAAGACACAAGCGGU 5'

**B**

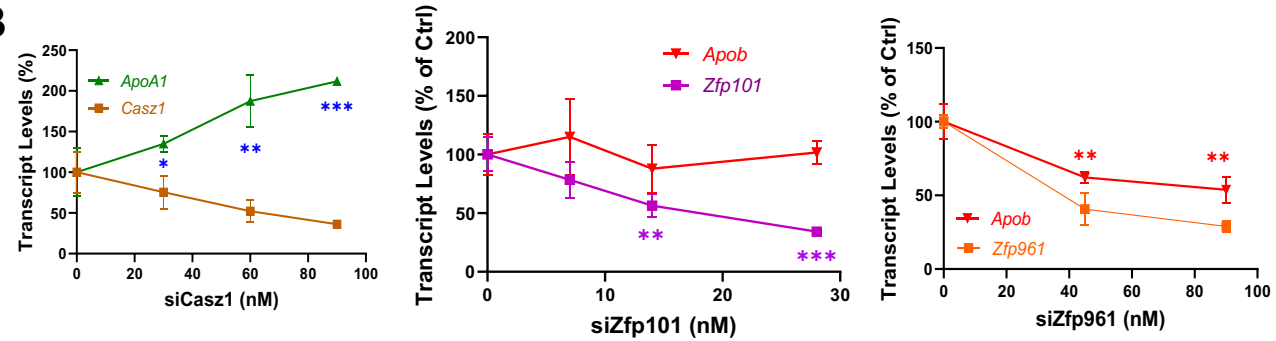

**C**

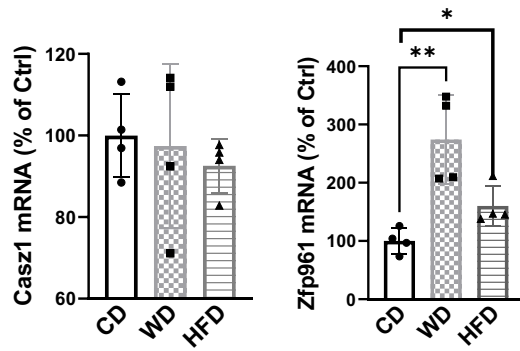

## Supplementary Fig 5. Mouse orthologs of human genes.

**(A)** Human and mouse miR-541-3p sequences are compared to highlight sequence differences (red). Hsa-miR-541-3p and mmu-miR-541-3p are not identical. They contain three different bases in seed and non-seed sequences each.

**(B)** Identification of mouse orthologs of human Znf101 and Casz1 and their role in the regulation of mouse apoB and apoA1 expression. Mouse liver AML12 cells were transfected in triplicate with different concentrations of mouse siCasz1 (left), siZfp101 (middle) or siZfp961 (right). After 48 h, the indicated mouse mRNAs were quantified in triplicate. These studies identified *Casz1* and *Zfp961* as functional mouse orthologs of human *CASZ1* and *ZNF101* genes. \*  $P < 0.05$ ; \*\*  $P < 0.01$ ; \*\*\* $P < 0.001$ ; \*\*\*\* $P < 0.0001$ .

**(C)** Male C57Bl6 mice ( $n = 4$ , 5 months old) were fed chow (CD), Western (WD) or obesogenic (HFD) diets for 13 weeks. Livers were collected to measure mRNA levels. *Zfp961* expression increased in the livers of high fat diet fed mice. One-way ANOVA, \*  $P < 0.05$ , \*\* $P < 0.001$ .

# Supplementary Fig 7

**A**

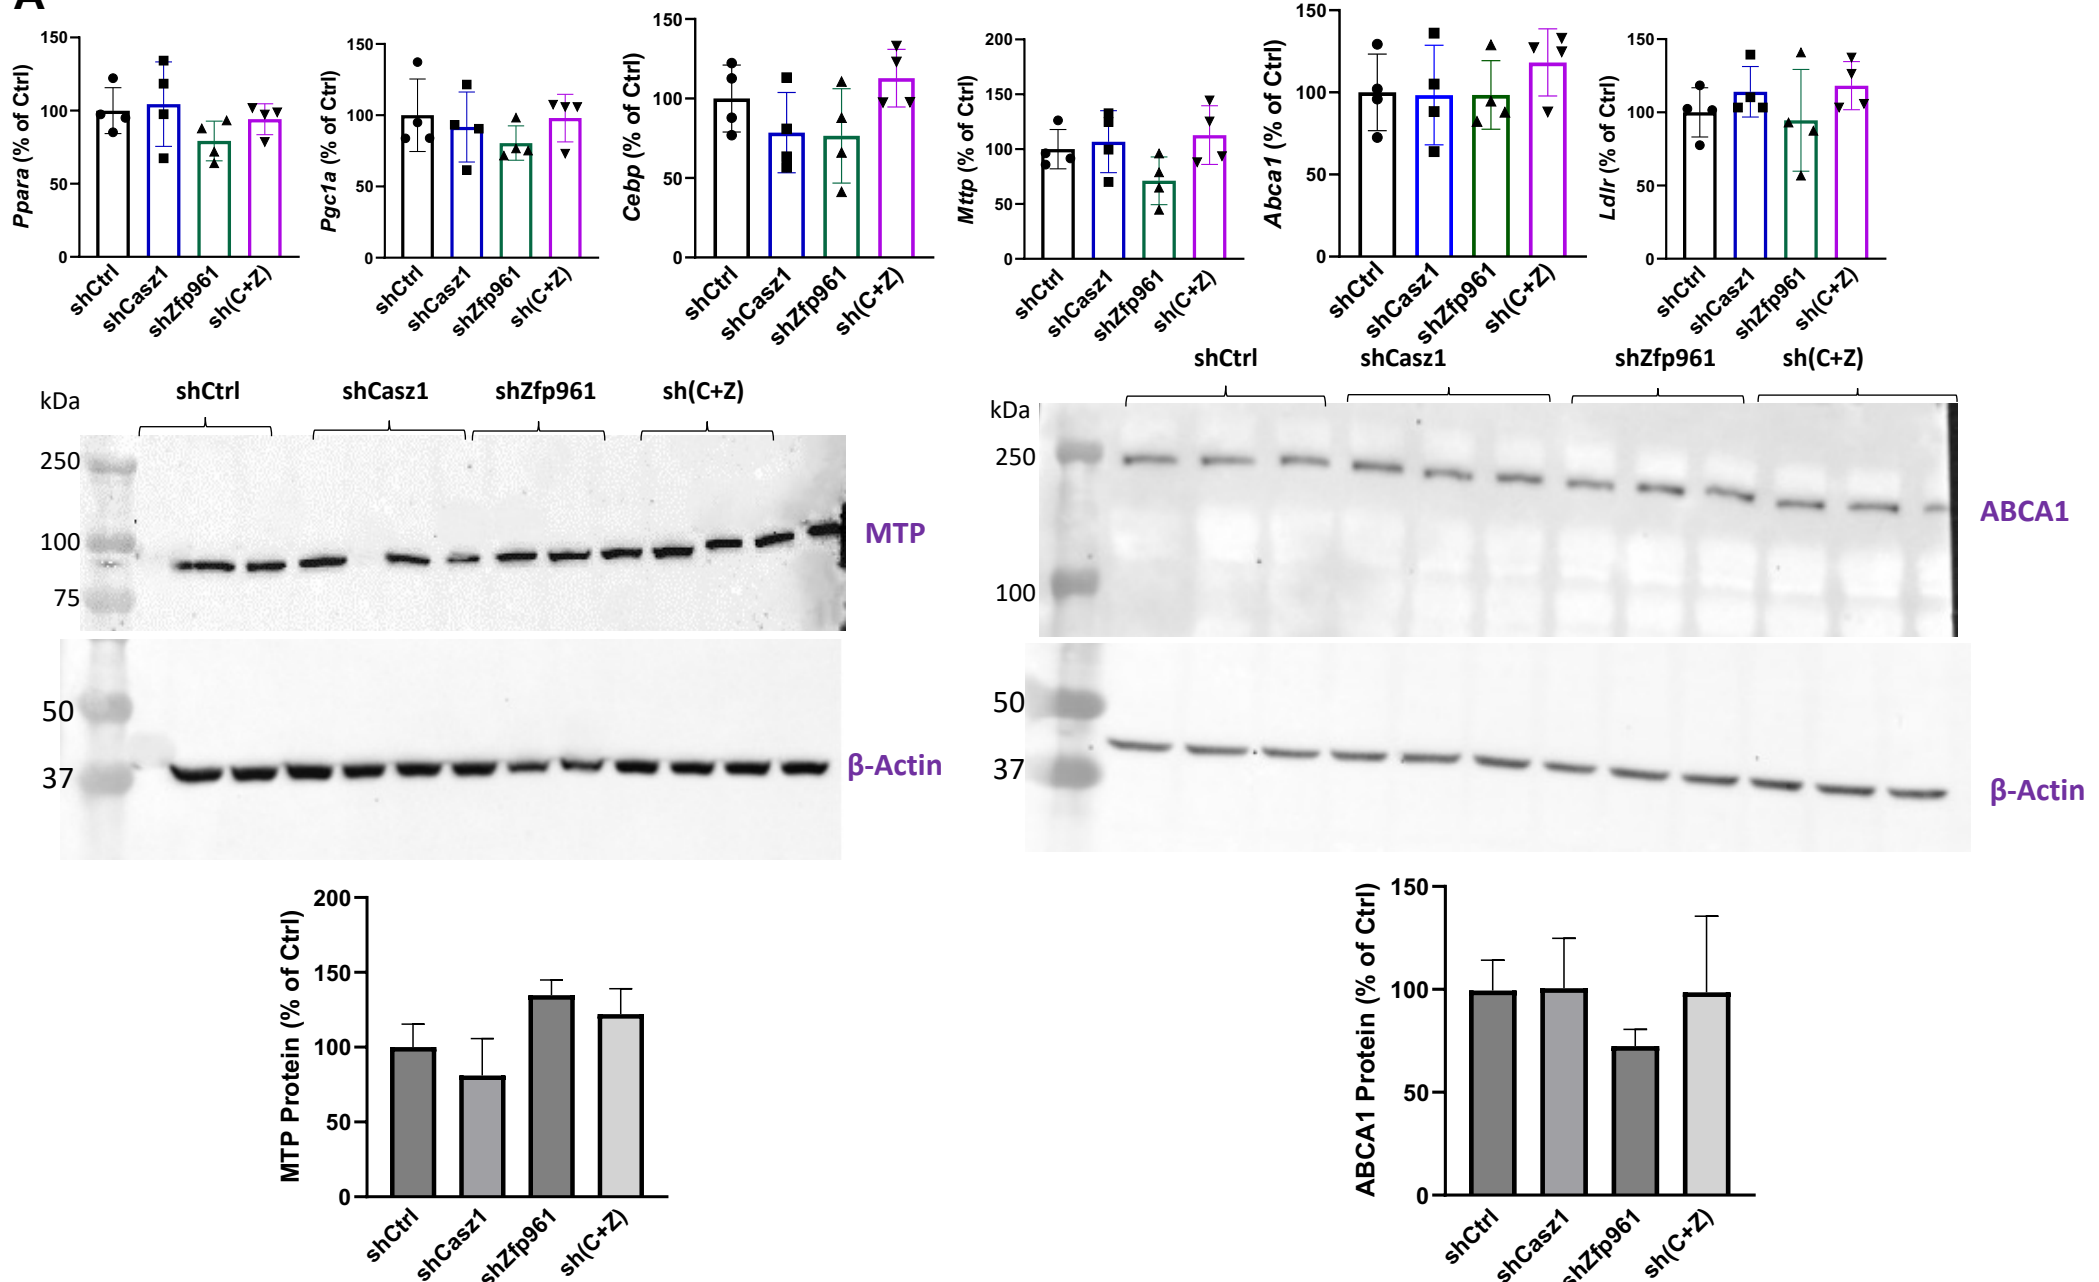

# Supplementary Fig 7

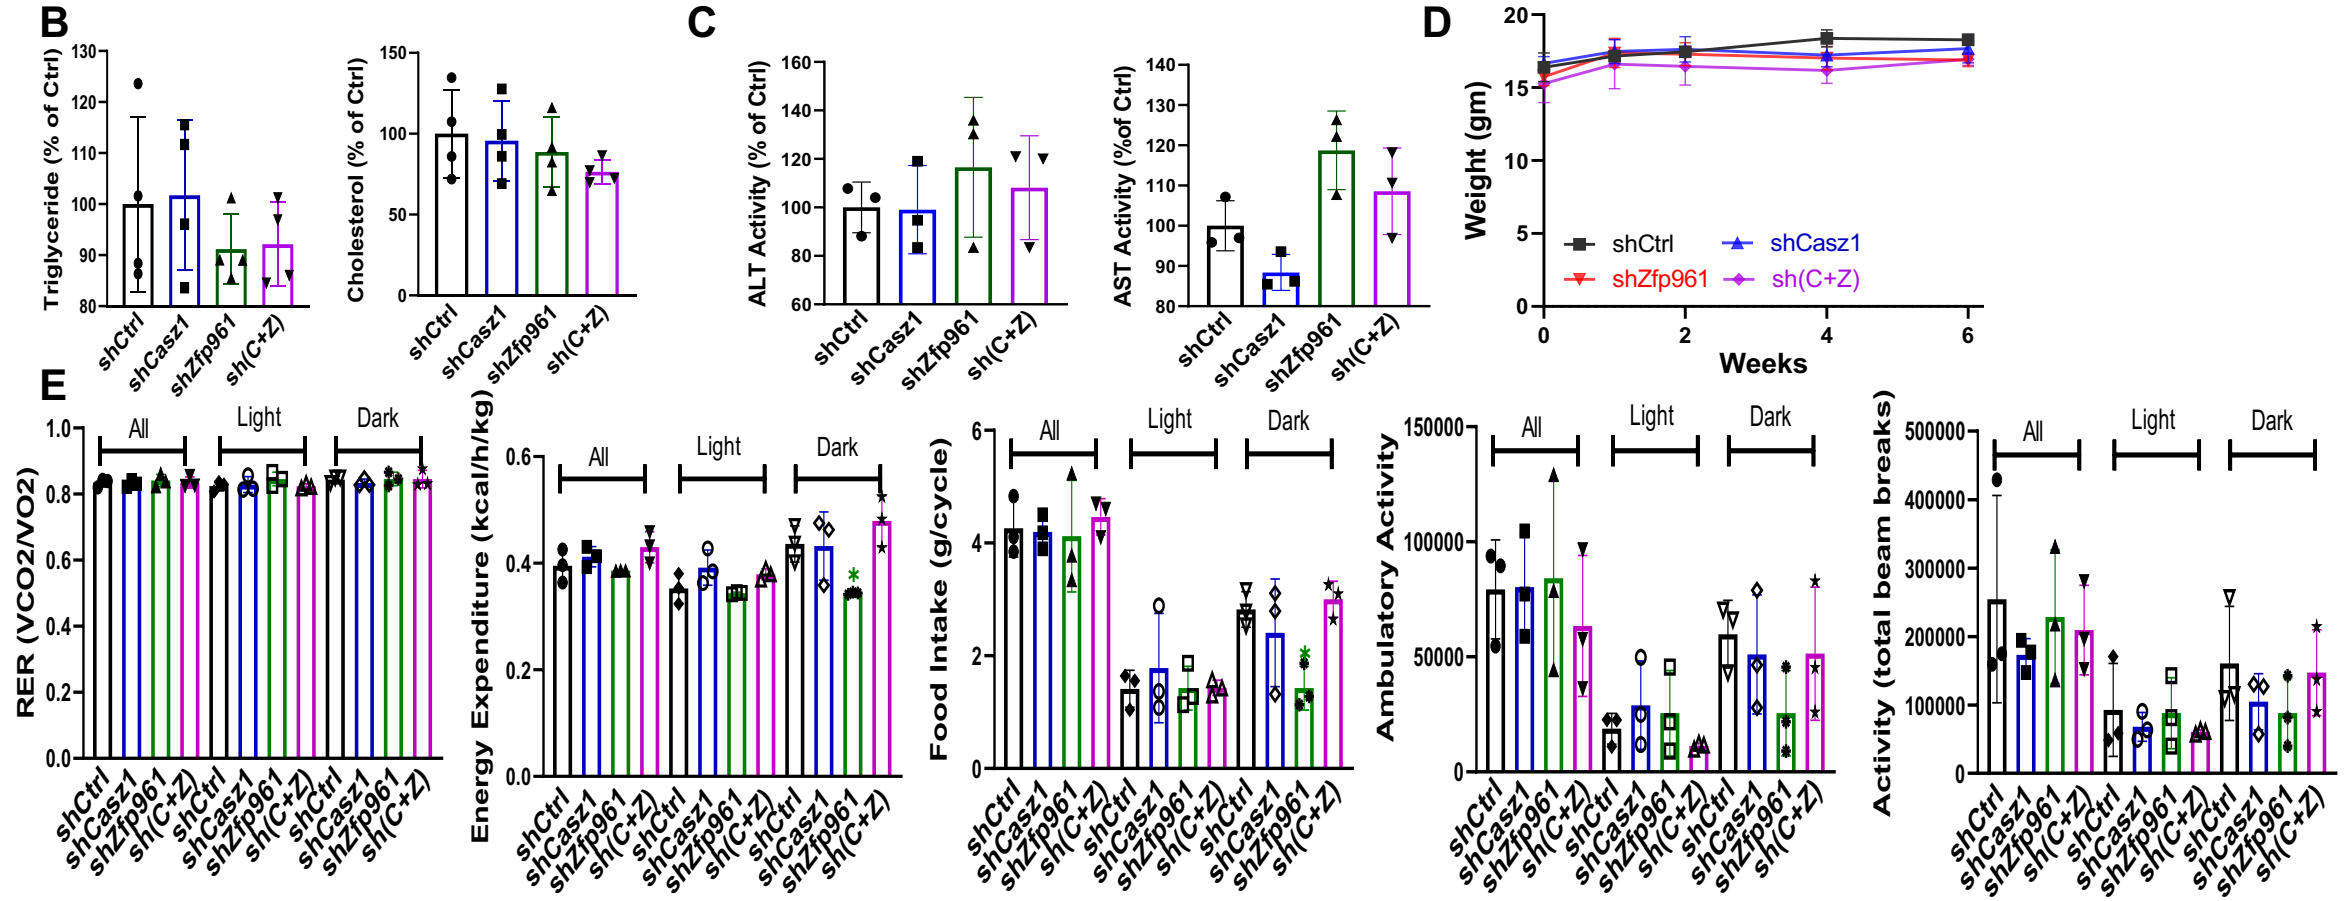

## **Supplementary Fig 7. Effect of hepatic Casz1 and Zfp961 knockdown on different parameters in mice.**

Mice (C57Bl6J, female, 2.5-month-old) were transduced with AAV8 ( $2.5 \times 10^{11}$  gc/mouse) expressing shControl (shCtrl,  $n = 4$ ), shCasz1 ( $n = 4$ ) or shZfp961 ( $n = 4$ ), alone or combined (sh(C+Z),  $n = 5$ ), and started on a Western diet.

**(A)** After 6 weeks, livers were collected to measure in triplicate different TFs and lipid metabolism genes. KD of different genes had no effect on their expression (top). Western blot analysis was performed to measure changes in MTP and ABCA1 (bottom). No significant differences in the expression of MTP and ABCA1 were found amongst different groups.

**(B)** After 6 weeks, lipids were extracted from liver slices and triglyceride and cholesterol levels were measured in triplicate and normalized with protein levels. KD of different genes had no effect on hepatic lipids.

**(C)** Plasma was used to measure ALT and AST activities in triplicate. These enzyme activities were unaffected by KD of Casz1 or Zfp961.

**(D)** Weight gain in mice was monitored over the course of 6 weeks. No significant differences were observed.

**(E)** After 5 week of transductions, mice were placed in CLAMS to measure different physiological parameters. No significant differences were noted.

# Supplementary Fig 8

**A**

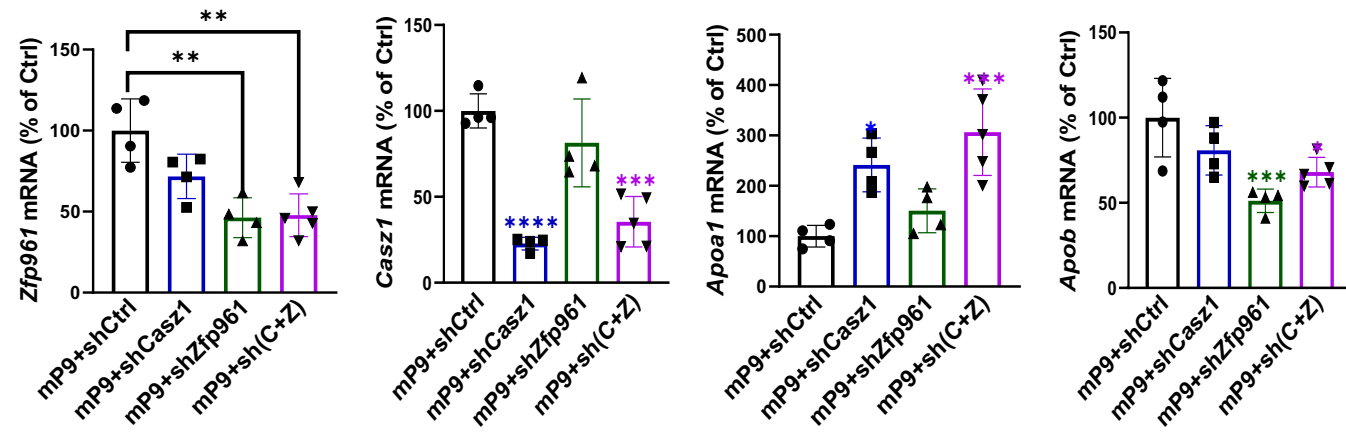

**B**

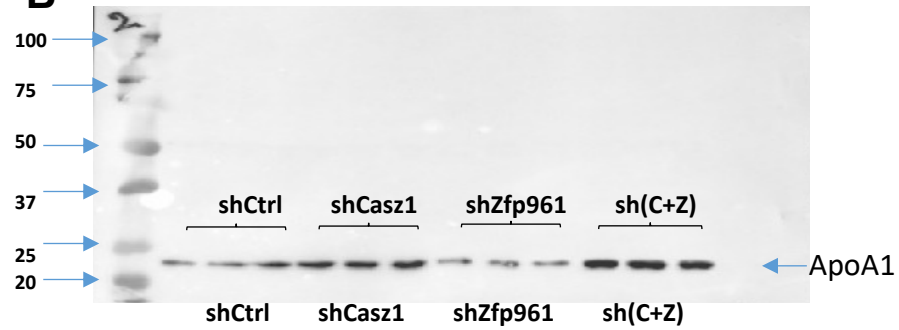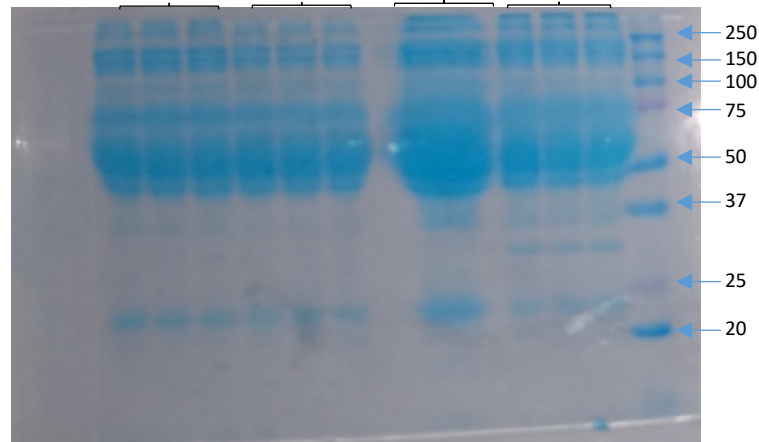

**C**

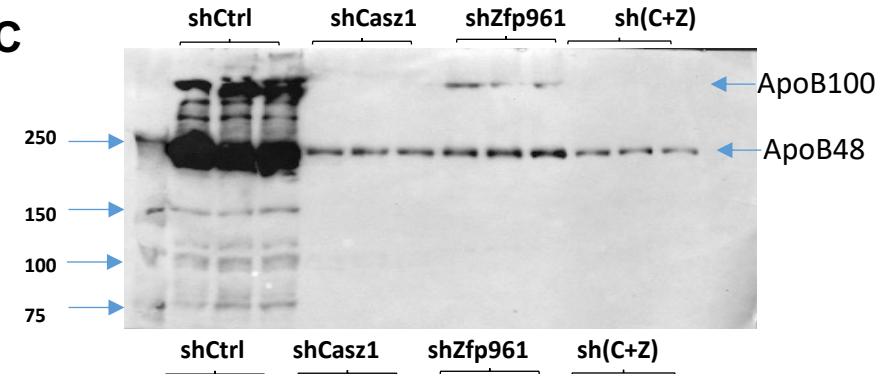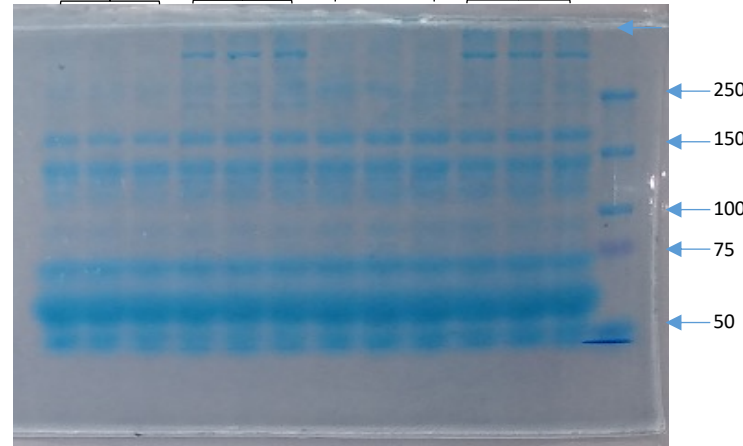

**Supplementary Fig 8. Effect of knockdown of different TFs on atherosclerosis.**

All mice received AA8 expressing mutant mouse PCSK9. In addition, mice were transduced with shCtrl, shCasz1, shZnf101, or shCasz1+shZnf101, and started on a Western diet.

**(A)** After 4 months, livers were collected to measure mRNA levels in triplicates.

**(B)** Detection of plasma apoA1 (top) by western blotting. Plasma (1  $\mu$ L) was separated on a 10% gel, transferred, and probed with anti-apoA1 antibodies. Plasma (1  $\mu$ L) was separated and stained with Coomassie blue (bottom) for control.

**(C)** Detection of apoB by western blotting (top) after separating plasma (1  $\mu$ L) on a 6% gel. Total plasma was separated and stained with Coomassie blue (bottom) for control.

# Supplementary Fig 9

**A**

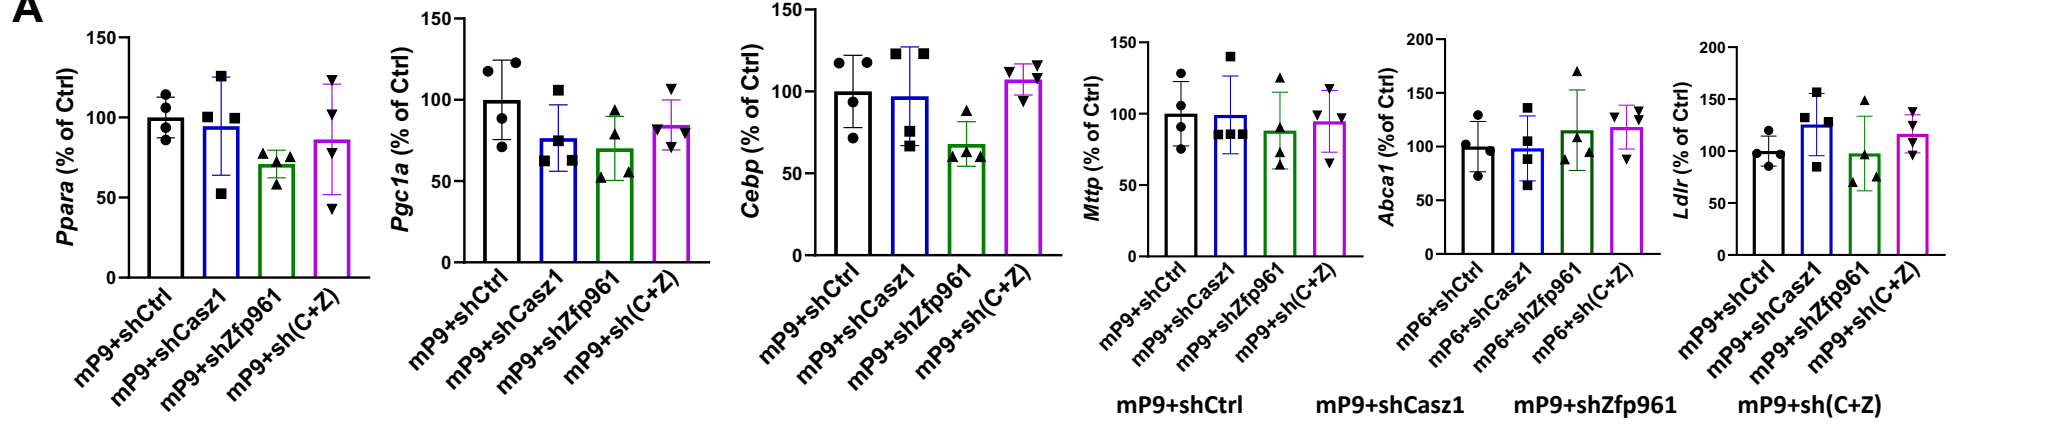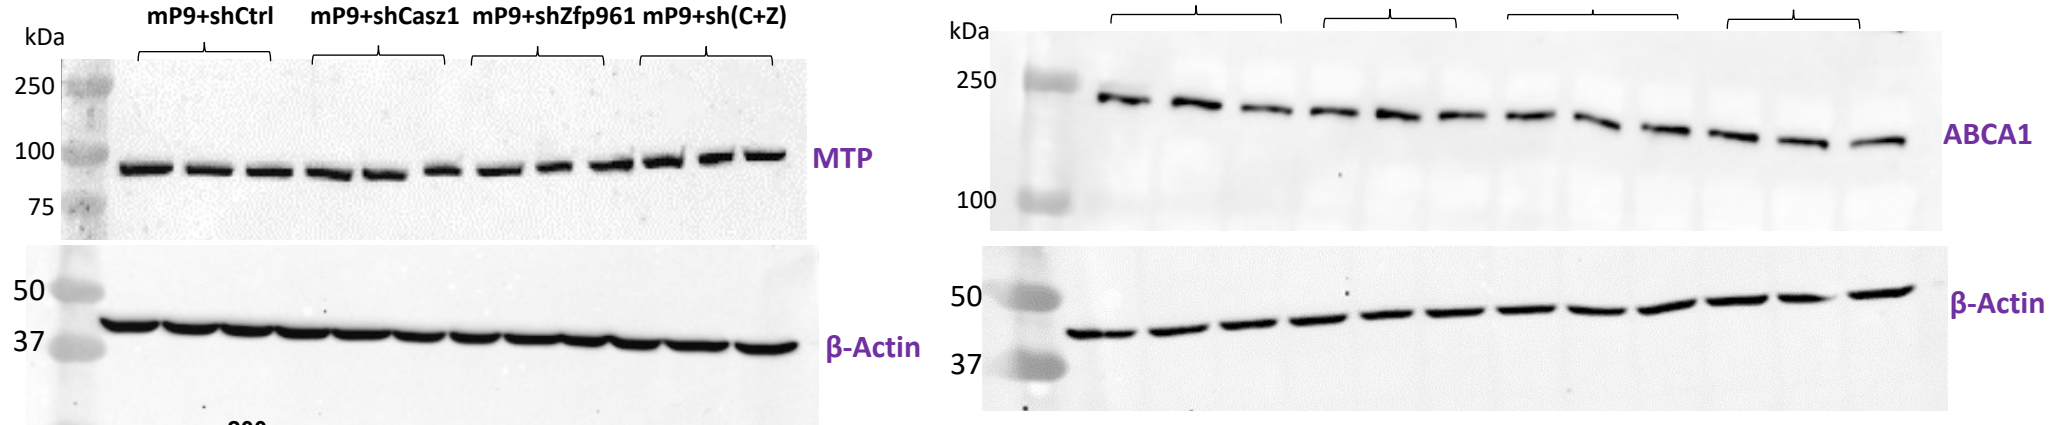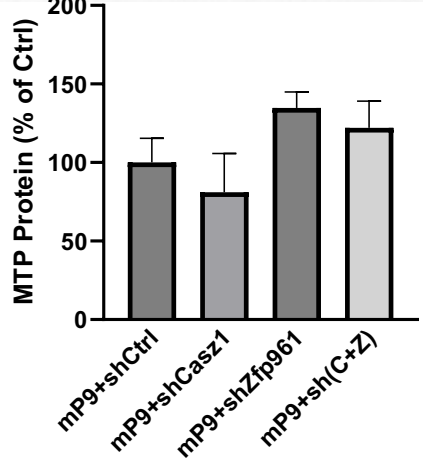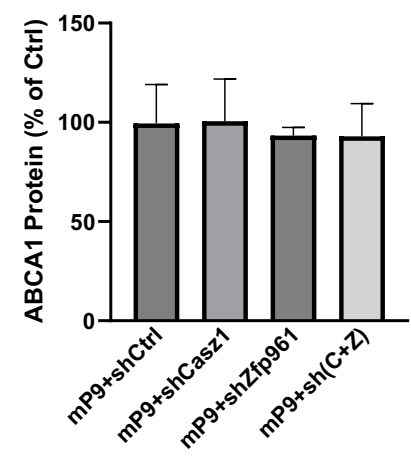

# Supplementary Fig 9

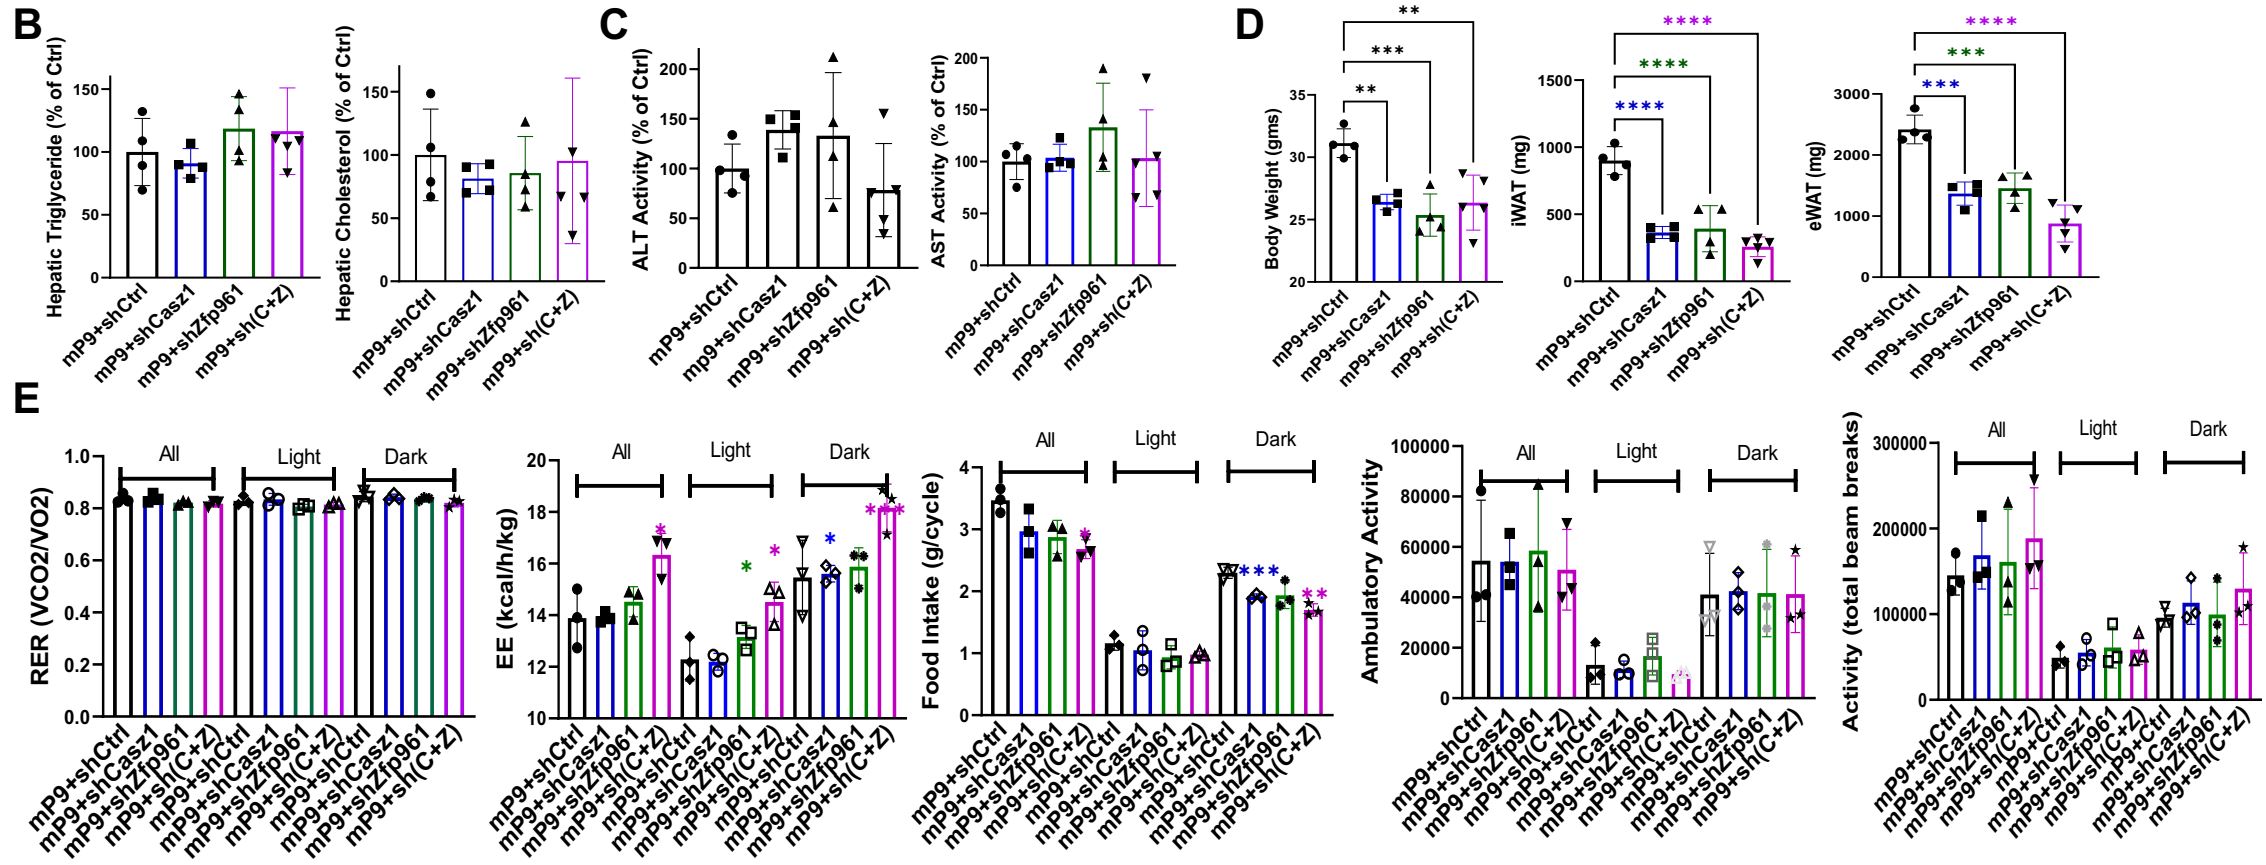

**Supplementary Fig 9. Effect of knockdown of different TFs on physiological parameters.** Mice were transduced with a combination of adenoviruses expressing gain-of-function mutant Pcsk9 and those expressing different shRNAs as in Fig 5.

**(A)** After 4 months, livers were collected to measure TFs and lipid metabolism genes in triplicates (top). Western blot analyses were performed to measure changes in MTP and ABCA1 proteins levels (bottom). MTP and ABCA1 mRNA and protein levels were similar in all the groups indicating that KD of different TFs had no effect on their expression.

**(B)** Lipids were measured in triplicates in livers and normalized to protein levels. Knockdown of different TFs had no effect on hepatic lipids.

**(C)** Plasma was used to measure AST/ALT activities in triplicates.

**(D)** At the end, different tissues were collected. Total body and adipose tissue weights in different knockdown mice were lower than in control mice (right). No differences in other organ weights were observed.

**(E)** After 3 months, mice were placed in CLAMS (comprehensive laboratory animal monitoring system) to monitor physiological indices.

Supplementary Fig 10

**A**

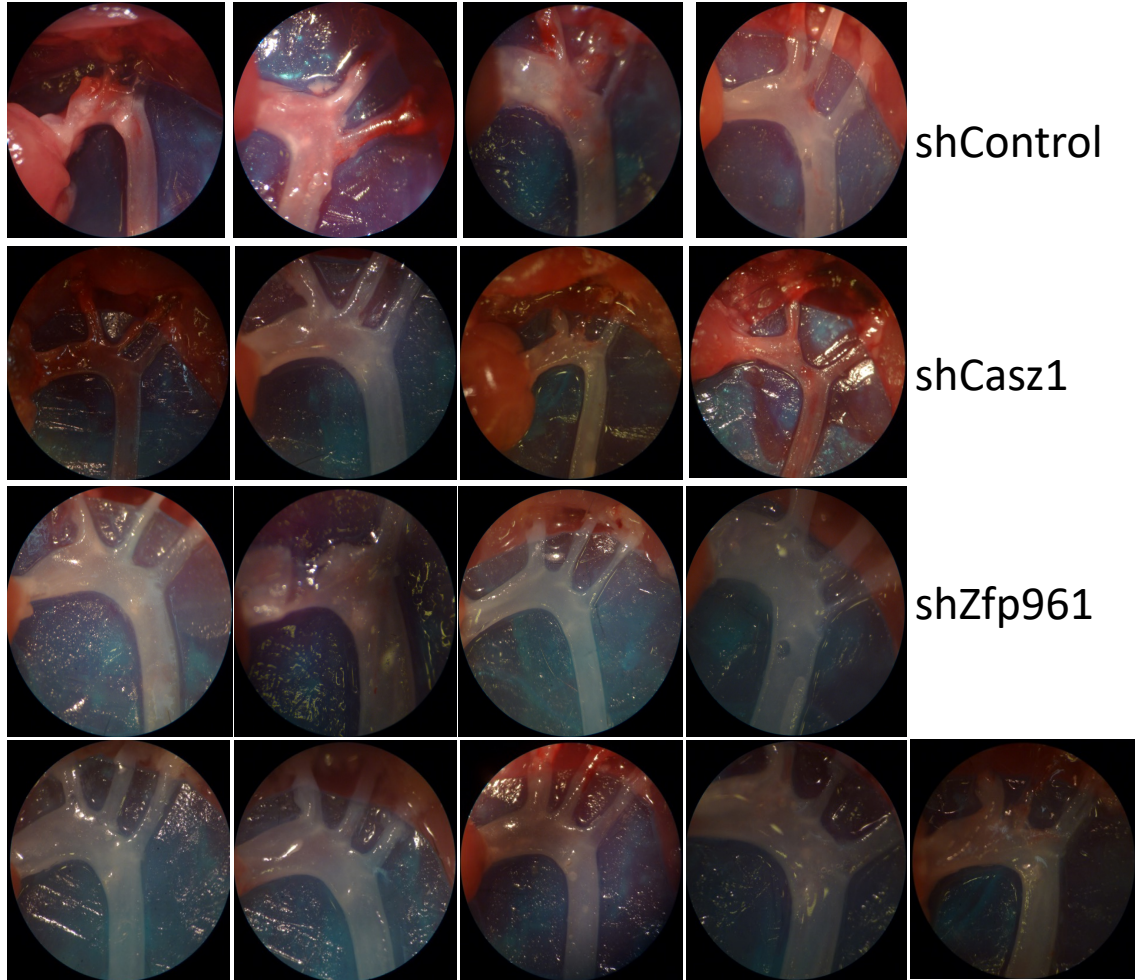

**B**

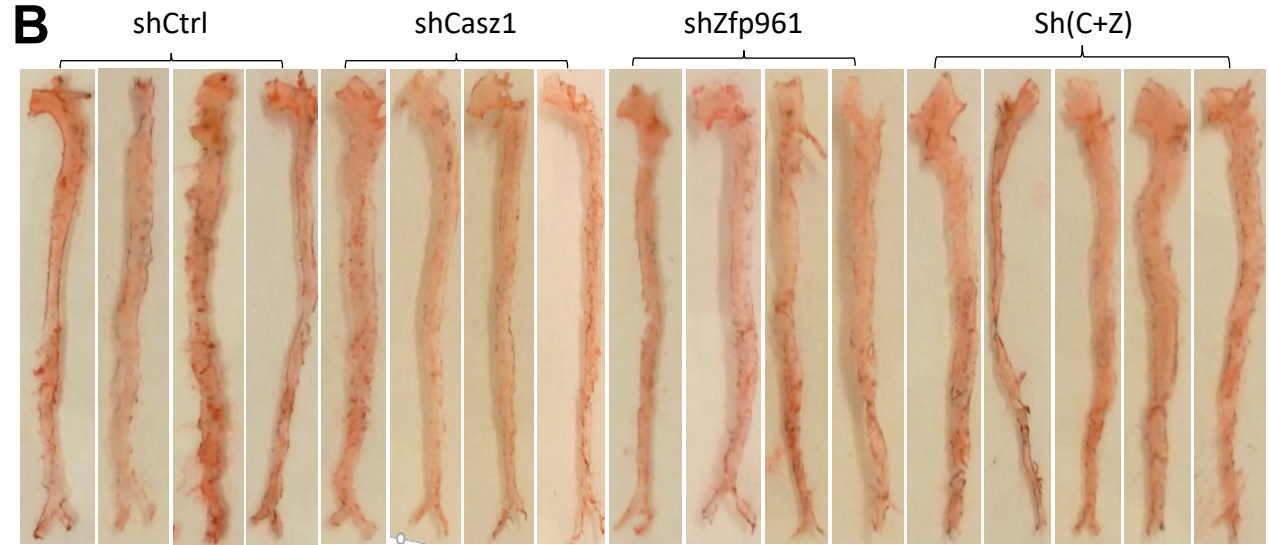

**Supplementary Fig 10. Effect of knockdown of different TFs on atherosclerosis.**

Mice were transduced with adenoviruses expressing gain-of-function mutant Pcsk9 and those expressing different shRNAs as in Fig 5.

**(A)** Aortas with major arteries were dissected from all mice, photographed, and presented as a collage.

**(B)** Whole aortas were stained with Oil Red O and all images were compiled.

# Supplementary Fig 11

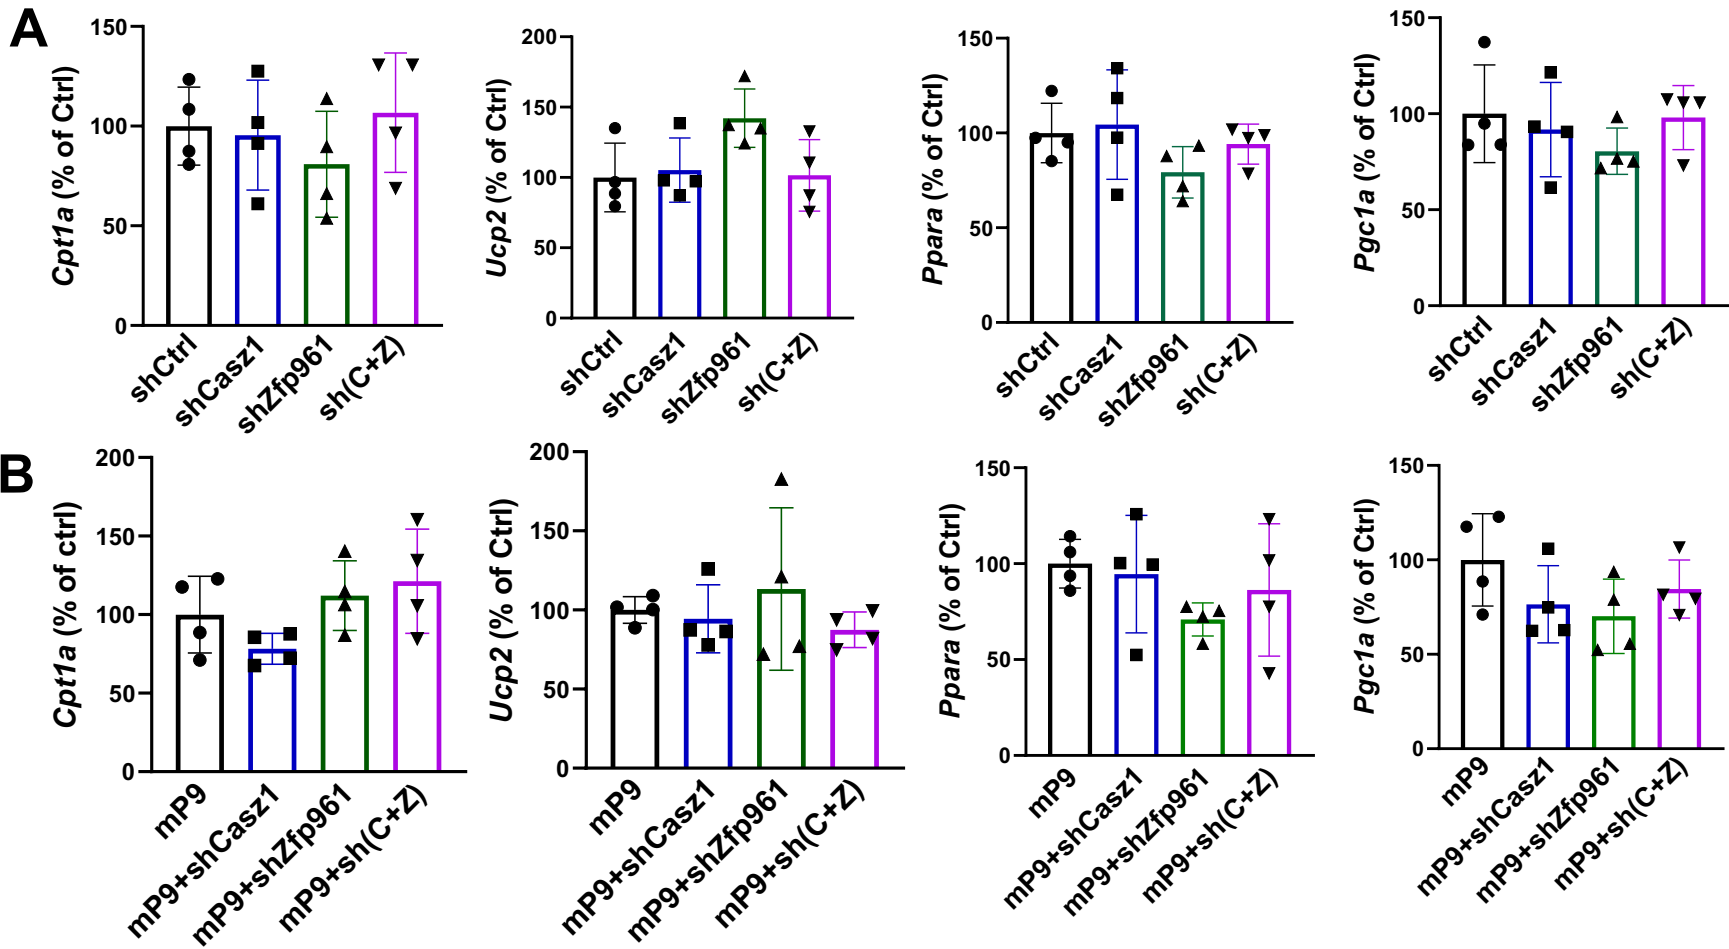

# Supplementary Fig 11

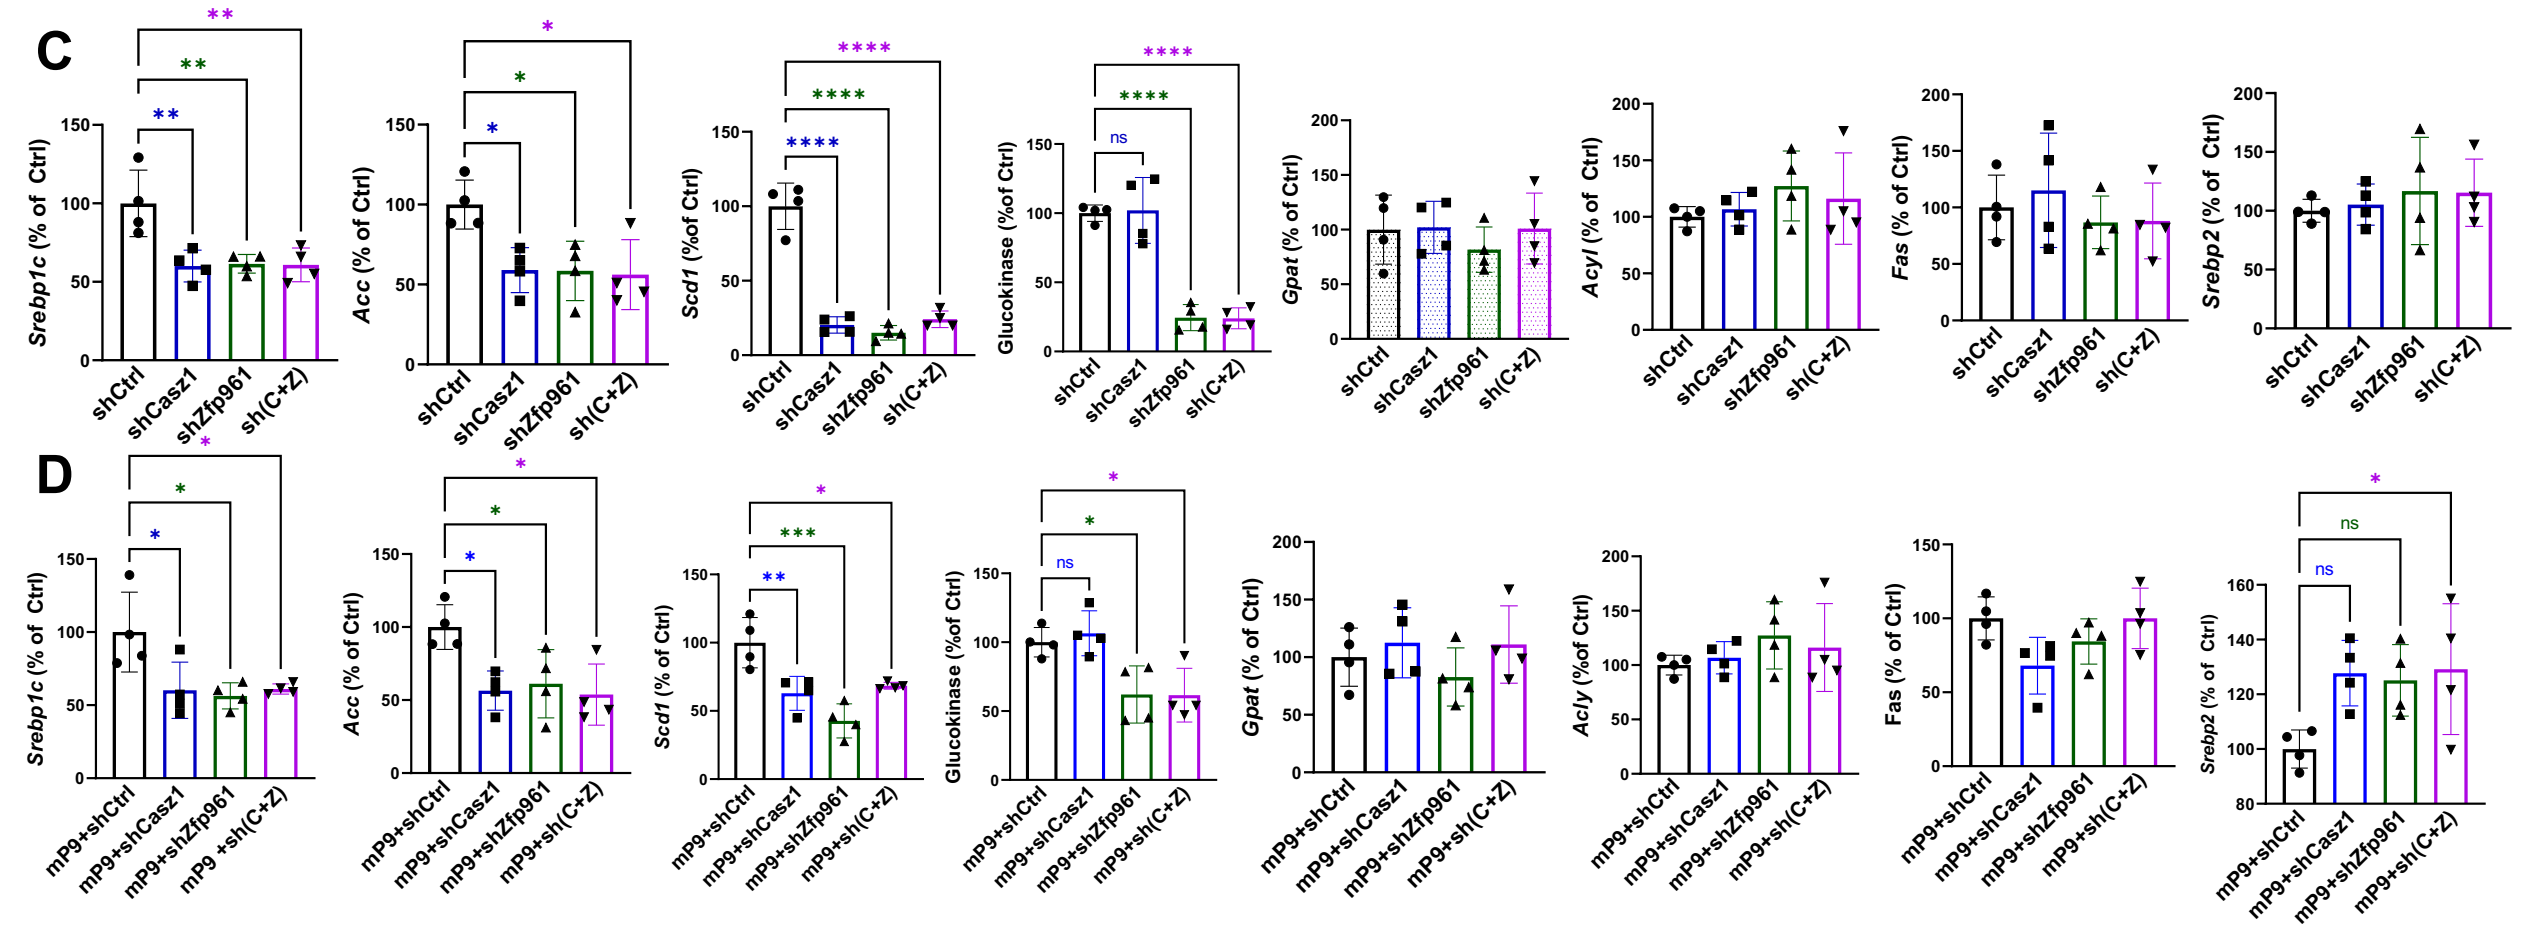

**Supplementary Fig 11. Hepatic knockdown of Casz1 and Znf961 has no effect on the mRNA levels of genes involved in  $\beta$ -oxidation, but reduces the expression of genes in lipogenesis.**

Mice were transduced with viruses as in Figs 4 and 5. Livers from these mice were used to quantify in triplicate different mRNAs involved in  $\beta$ -oxidation (A, B) and lipogenesis (C, D).

**Supplementary Table 2. Physical parameters in different mice transduced with different shRNAs measured using dual-energy x-ray absorptiometry (DEXA).** Mice were transduced with different shRNAs as described in Fig 4. DEXA was performed 3 months after the injection of viruses. All KD mice showed significantly less fat weight. Data are average +SD, Student *t*-test compared to controls.

| DEXA parameters                            | shCtrl (n=4) | shCasz1 (n=4)                    | shZfp961 (n=4)                    | sh(C+Z) (n=5)                     |
|--------------------------------------------|--------------|----------------------------------|-----------------------------------|-----------------------------------|
| Total Weight (gms)                         | 23.11 ± 0.55 | 24.60 ± 1.32<br>P = 1.72         | 23.59 ± 0.18<br>P = 0.86          | 21.31 ± 1.50,<br>P = 0.06         |
| Soft Weight (gms)                          | 21.91 ± 0.49 | 23.61 ± 1.42<br>P = 0.13         | 22.63 ± 0.13<br>P = 0.70          | 20.34 ± 1.60<br>P = 0.14          |
| Lean Weight (gms)                          | 12.82 ± 2.92 | 16.20 ± 2.92<br>P = 0.19         | 16.38 ± 0.95<br>P = 0.17          | 13.99 ± 2.75<br>P = 0.88          |
| Fat Weight (gms)                           | 10.59 ± 0.75 | 7.41 ± 1.69<br><b>P = 0.001</b>  | 6.25 ± 0.86<br><b>P = 0.0002</b>  | 6.35 ± 1.75<br><b>p&lt;0.0001</b> |
| Fat (% of body weight)                     | 46.46 ± 4.05 | 31.72 ± 8.83<br><b>P = 0.003</b> | 27.64 ± 3.92<br><b>P = 0.0005</b> | 31.56 ± 0.94<br><b>P = 0.0003</b> |
| Bone Mineral Content (gms)                 | 1.25 ± 0.17  | 0.98 ± 0.11<br>P = 0.08          | 0.96 ± 0.11<br>P = 0.052          | 0.97 ± 0.18<br><b>P = 0.05</b>    |
| Bone Mineral Density (mg/cm <sup>2</sup> ) | 88.66 ± 3.82 | 87.76 ± 3.72<br>P = 0.99         | 90.52 ± 7.65<br>P = 0.94          | 88.42 ± 6.85<br>P = 0.99          |

**Supplementary Table 3. Total weight gain was less in different mice transduced with shRNAs to KD Casz1 and Zfp961.** Mice were transduced with different shRNAs as described in Fig 5. DEXA was performed 3 months after the injection of viruses. All KD mice showed significantly less total; soft, lean and fat weights. Data are average +SD, Student *t*-test compared to controls.

| DEXA Parameters                            | mPcsk9+shCtrl (n=4) | mPcsk9+shCasz1 (n=4)             | mPcsk9+shZfp961 (n=4)            | mPcsk9+sh(C+Z) (n=5)              |
|--------------------------------------------|---------------------|----------------------------------|----------------------------------|-----------------------------------|
| Total Weight (gms)                         | 40.97 ± 0.82        | 34.18 ± 2.58<br><b>P = 0.024</b> | 36.17 ± 1.47<br><b>P = 0.001</b> | 30.58 ± 3.16<br><b>P = 0.0004</b> |
| Soft Weight (gms)                          | 40.00 ± 0.81        | 33.28 ± 2.59<br><b>P = 0.002</b> | 35.21 ± 1.38<br><b>P = 0.001</b> | 29.61 ± 3.17<br><b>P = 0.002</b>  |
| Lean Weight (gms)                          | 27.05 ± 0.49        | 22.83 ± 1.35<br><b>P = 0.001</b> | 23.47 ± 2.61<br><b>P = 0.041</b> | 20.07 ± 2.54<br><b>P = 0.0004</b> |
| Fat Weight (gms)                           | 13.17 ± 0.58        | 10.45 ± 1.37<br><b>P = 0.013</b> | 10.24 ± 1.09<br><b>P = 0.005</b> | 9.54 ± 1.01<br><b>P = 0.0006</b>  |
| Fat (% of body weight)                     | 32.93 ± 1.12        | 31.31 ± 1.92<br>P = 0.19         | 33.25 ± 8.01<br>P = 0.94         | 32.27 ± 2.46<br>P = 0.64          |
| Bone Mineral Content (gms)                 | 0.98 ± 0.01         | 0.90 ± 0.02<br><b>P = 0.003</b>  | 0.96 ± 0.10<br>P = 0.82          | 0.96 ± 0.08<br>P = 0.76           |
| Bone Mineral Density (mg/cm <sup>2</sup> ) | 86.32 ± 1.50        | 85.38 ± 2.26<br>P = 0.51         | 86.12 ± 0.77<br>P = 0.81         | 89.55 ± 2.30<br>P = 0.04          |

Data are average +SD. Student *t*-test



**SUPPLEMENTARY TABLE 4:** Different diets, chemicals and siRNAs used and their sources have been tabulated. In addition, this table contains primer sequences used in the study for mRNA quantitation and site-directed mutagenesis.

| Diets      | % Fat | Company, ID            |
|------------|-------|------------------------|
| Chow       | 13%   | Lab Diet, 5053         |
| Western    | 45%   | Envigo, TD.88137       |
| Obesogenic | 60%   | Research Diets, D12492 |
|            |       |                        |

| siRNAs oligo                         |                             |
|--------------------------------------|-----------------------------|
| Universal scrambled negative control | CGUUAUCGCGUAUAAUACGCGUAT    |
| ZNF101 Human siRNA Oligo Duplex      | GAAGUCUAAGGUAAUUUGAAAAAGUAA |
| CASZ1 Human siRNA Oligo Duplex       | UUUGGAGAAGGUUGACUUCAGGUACUC |
| Casz1 Mouse siRNA Oligo Duplex       | CGUGAAGGAUCCCAGUAAUGAAUCA   |
| Zfp961 Mouse siRNA Oligo Duplex      | ACACUGCCAGUCAAUCAUCCUGAA    |

| Reagents                                     |                          |                            |
|----------------------------------------------|--------------------------|----------------------------|
| Items                                        | Vendor                   | Catalog #                  |
| Hsa-miR-541-3p                               | Thermo Fisher Scientific | 4464066, Assay ID#MC13119  |
| Hsa-AntimiR-541-3p                           | Thermo Fisher Scientific | 4464084, Assay ID# MH13119 |
| Hsa-miR-541-5p                               | Thermo Fisher Scientific | 4464066, Assay ID#MC12516  |
| miRNA Negative Control                       | Thermo Fisher Scientific | 4464058                    |
| TaqMan™ miR-541-3p Assay                     | Thermo Fisher Scientific | 4427975, Assay ID#002201   |
| TaqMan™ miR-U6 Assay                         | Thermo Fisher Scientific | 4427975, Assay ID#001973   |
| TaqMan™ MicroRNA Reverse Transcription Kit   | Thermo Fisher Scientific | 4366596                    |
| TaqMan™ Universal Master Mix II, no UNG      | Thermo Fisher Scientific | 4440043                    |
| PowerTrack SYBR Green Master Mix             | Thermo Fisher Scientific | A46012                     |
| High-Capacity cDNA Reverse Transcription Kit | Thermo Fisher Scientific | 4374967                    |
| TRIzol™ Reagent                              | Thermo Fisher Scientific | 15596026                   |
| ELISA Pro: Human apoB                        | MABTECH                  | 3715-1HP-20                |
| Human Apolipoprotein A-II/ApoA1 DuoSet ELISA | R&D system               | DY3664-05                  |
| miRNA Target clone control vector            | Genecopoeia              | CmiT000001-MT05            |

|                                                              |                          |                      |
|--------------------------------------------------------------|--------------------------|----------------------|
| miRNA 3'UTR target expression clone for Human ZNF101         | Genecopoeia              | HmiT071405-MT05      |
| miRNA 3'UTR target expression clone for Human CASZ1          | Genecopoeia              | HmiT105330-MT05      |
| Custom promoter reporter clone for Human APOB                | Genecopoeia              | CS-HPRM30361-PG04-02 |
| Promoter reporter clone for Human APOA1                      | Genecopoeia              | HPRM25646-PG04       |
| Zfp961-AAVPrime™ Purified AAV Particles                      | Genecopoeia              | AA08-MSH074798-AV03  |
| Casz1-AAVPrime™ Purified AAV Particles                       | Genecopoeia              | AA08-MSH034915-AV03  |
| AAVPrime™ Purified AAV Particles for shRNA scrambled control | Genecopoeia              | AA08-CSHCTR001-AV03  |
| AAV8-D377y-mPCSK9 (5e12 gc)                                  | Vector biosystems Inc    | 7600                 |
| Secrete-Pair Dual Luminescence Assay                         |                          | LF031                |
| Apolipoprotein A-I/ApoA1 Antibody                            | NOVUS                    | NBP2-15429           |
| Apolipoprotein B (APOB), Polyclonal Antibody                 | MyBiosource              | MBS2006107           |
| Anti-Argonaute-2 antibody                                    | Abcam                    | ab186733             |
| Anti-Casz1 antibody                                          | Rockland                 | 600-401-B62          |
| Anti-Znf101 antibody                                         | Thermo Fisher            | 25599-1-AP           |
| Pointe Scientific Triglycerides Liquid Reagent               | Pointe Scientific        | 23-666-411           |
| Pointe Scientific Cholesterol Liquid Reagents                | Pointe Scientific        | 23-666-200           |
| EndoFectin™ Max transfection Reagent                         | Genecopoeia              | EF013                |
| Protease Inhibitor Cocktail                                  | Sigma Aldrich            | P1860                |
| RIPA buffer                                                  | Thermo Fisher Scientific | J63306               |
| Poloxamer 40716758                                           | Sigma Aldrich            | 40716758             |
| Olive oil                                                    | Sigma Aldrich            | 01514                |
| T0901317, LXR agonist                                        | Abcam                    | ab142808             |
| ScintiSafe™ Econo 2 Cocktail                                 | Thermo Fisher Scientific | FISSX21-5            |
| Cholesterol, [1,2-3H(N)]                                     | Perkin Elmer             | NET139001MC          |

| Human primers |                            |                       |
|---------------|----------------------------|-----------------------|
| Gene name     | Forward primer             | Reverse primer        |
| ZNF101        | GGAAGCCGAAATGGA CT CAG     | CATTGGATTCCGACCGAGGC  |
| MAFK          | GCACACATGGCAGAGAGAGT       | GAGTCCTGCTCACCGTCAAA  |
| NFATC3        | GCTCTCATGTCCAGCTCCTTT      | AGTTGGTGGTGGACACAAGG  |
| RELA          | TCCAGTGTGTGAAGAAGCGG       | TCCCACGCTGCTCTTCTAT   |
| ZNF275        | AAGTCCTTCCGAGGGGTCAA       | GAAGGCCG CAGGC GTAG   |
| ELK4          | TCACGAGCAGTGATCCAAGC       | AAGAGCGAGCAAGCTACCTG  |
| HSF1          | GAAGCAGCTGGTGC ACTACA      | CTGT CAGCAGGGAGATGGTG |
| ZNF442        | ACCTCATGTGTTG TAAAAGCTATGT | CTATGTAGGCAGGCCTGTGA  |
| ZSCAN22       | GCGCAAGTTGGCTAGTCTCT       | GGAAGCTGTCCTCTTCCCAC  |
| ZNF746        | GGACCCTGAAGCTCAACACA       | CTTCCCAGGCTCCTTCTCTG  |
| CASZ1         | CCGAGGGTGTCTACATGGTG       | CCCGTCCGAATCCTTCTCC   |

|                                                               |                                            |                        |
|---------------------------------------------------------------|--------------------------------------------|------------------------|
| HNF4A                                                         | GCAATGACACGTCCCCATCA                       | TCGAGGCACCGTAGTGTTTG   |
| ZNF771                                                        | AGGGGGTGGGGCTATATGTTT                      | CAGGCATCTTGGTGTCTGAG   |
| IRF3                                                          | ACACATACTGGGCAGTGAGC                       | CTACAATGAAGGGCCCCAGG   |
| THRB                                                          | TGCGCTTGAAAAAGAGACCT                       | AATTACCAGTGCCCTGGAGC   |
| NR4A3                                                         | TGCGTCCAAGCCCAATATAGC                      | GGTGTATTCCGAGCTGTATGT  |
| ZBTB4                                                         | TCCCTTTTGCAGTGGGCTT                        | CCTTCGATTTCGAGAGCAGA   |
| ZNF100                                                        | AGGGGCCATTGACGTTTAGG                       | AGGGCTCTTTTCTTGCTCC    |
| RARA                                                          | CACACACCTGAGCAGCATCAC                      | TCAAGAGCCGGTCTTTGGT    |
| ZSCAN16                                                       | TAAGGCAGAGGACCATTACTGG                     | TGCATCCTGATAGCAGAGCTT  |
| ZNF726                                                        | ATGAACCCCGAGGTAGGTGA                       | TTCAGGCTTTCCAGAAACGGT  |
| YY1                                                           | ACGGCTTCGAGGATCAGATTC                      | TGACCAGCGTTTGTTCATGT   |
| ZNF4471                                                       | GTCCTTCGGATGAGAGCGTC                       | AGCAGGGTTCATCCATTGCC   |
| ZNF81                                                         | GTTCTCAGCCGGGGTTTGAT                       | CTGCTGGGGTCAGAAGGAAG   |
| SP6                                                           | CTTCCTTGCTGAGAGGGTTG                       | TAGGATGGCCACTGGAAAAG   |
| FOXI1<br>(NM_012188.5)                                        | GGAAGTCACCAGTGGCCTTA                       | GGTGGGAGGATTTAGGGGTA   |
| ONECUT3                                                       | AAGGAACCTCCTCCCTGAAA                       | GCACAAATCCTTGGGAGAAA   |
| ZNF418                                                        | GGGTGTGTTTCTGCGGTTT                        | CCTCTGTGCAGCAAGAAGGA   |
| MTP                                                           |                                            |                        |
| ABCA1                                                         | AACAGTTTGTGGCCCTTTTG                       | AGTTCCAGGCTGGGGTACTT   |
| ApoA1                                                         | AGAGACTGCGAGAAGGAGGT                       | TCTCTGCCGCTGTCTTTGAG   |
| ApoB                                                          | TGTCAGTACACACTGGACGC                       | TCAAATGCGAGGCCCATCTT   |
| SDM_apoa1<br>luciferase promoter<br>plasmid                   | GCGTGATCAAcgcTAAGTGTGAA<br>C<br>AATGCAAAGG | ACAGGTGTGACTGGATCTC    |
| SDM_ApoB luciferase<br>promoter plasmid with<br>mutated bases | AAGGCATCTGataATGGGGCGTG                    | ACTTGGACAGACCAGGCT     |
| <b>Mice primers</b>                                           |                                            |                        |
| Cas2                                                          | CCTCCAAGTGCCTGAGCTAC                       | CGGGGTCTAGAGATTCCTC    |
| Zfp961                                                        | TGACCCATGTGGAGAAACGG                       | ACAGTGCCGTAAGTGAAGG    |
| Zfp101                                                        | GGTGAATGTGAACGTGGTTG                       | CCCAGCATTCTCAGGTTTA    |
| Apoa1                                                         | GGCCGTGGCTCTGGTCTT                         | AGCGTGGTGAAGGGCTTAT    |
| ApoB                                                          | TCCATATTCCAGACAACCTCTTC                    | GTTTATTTTGTTCCTGTTTATT |
| HNF4 $\alpha$                                                 | ACAGGAGAGGGTCAGAAGCA                       | ATGTTTGCACAACCACAGGA   |
| PPAR $\alpha$                                                 | CACGCATGTGAAGGCTGT                         | GCTCCGATCACACTTGTCTG   |
| PGC $\alpha$ 1                                                | CTGTCGAGTCTGTTGGAGCA                       | GGGAATGTCAATGCCTGAGT   |
| C/EBP                                                         | TTACAACAGGCCAGGTTTCC                       | CTCTGGGATGGATCGATTGT   |
| MTP                                                           | CACACAAGTGGCTCTCTCATTAA<br>AT              | TGCCCCATCAAGAAACT      |
| ABCA1                                                         | AACAGTTTGTGGCCCTTTTG                       | AGTTCCAGGCTGGGGTACTT   |
| LDLR                                                          | GAAAAGGCTACTGGCTGTGC                       | CCAGGACCCGGTCAGTAGTA   |
| SREBP2                                                        | CCATCTTCCCCTCTCTTTCC                       | AGGGAAGATCCTGGGAGAAA   |
| SCD1                                                          | CTTCAAGGGCAGTTCTGAGG                       | CAATGGTTTTTCATGGCAGTG  |
| Glucokinase                                                   | CTTCCAGGCCACAAACATT                        | TGAGTGTTGAAGCTGCCATC   |

|                |                       |                              |
|----------------|-----------------------|------------------------------|
| mGpat          | AGCAAGTCCTGCGCTATCAT  | CTCGTGTGGGTGATTGTGAC         |
| ACLY           | AGGTCTCTCTGCAGCCATGT  | AAGCTTTCCTCGACGTTTGA         |
| ACC            | GCCTCTTCCTGACAAACGAG  | TGACTGCCGAAACATCTCTG         |
| SREBP1c        | AGGTGTATTTGCTGGCTTGGT | AGAGATGACTAGGGAAGTGT<br>GTGT |
| FAS            | CTCAGTGTGCCACCTA G    | GCACTTGCTTGATGCAATCT         |
| UCP1           | CGTGAAGGTCAGAATGCAA   | GCATTGTAGGTCCCCGTG           |
| UCP2           | GCGTTCTGGGTACCATCCTA  | GCTCTGAGCCCTTGGTGTAG         |
| CPT1           | GACTCCGCTCGCTCATT     | TCTGCCATCTTGAGTGGTGA         |
| HNF4 $\alpha$  | ACAGGAGAGGGTCAGAAGCA  | ATGTTTGCACAACCACAGGA         |
| PPAR $\alpha$  | CACGCATGTGAAGGCTGT    | GCTCCGATCACACTTGTGCG         |
| PGCa1 $\alpha$ | CTGTCCGAGTCTGTTGGAGCA | GGGAATGTCAATGCCTGAGT         |
| C/EBP          | TTACAACAGGCCAGGTTTCC  | CTCTGGGATGGATCGATTGT         |

**Supplementary Table I. The effect of 1237 miRs on apoB and apoAI secretion in Huh7 cells. Medium apoB and apoAI were normalized against protein levels and calculated to percentages of Scr control.**

| Mature Name       | Mature Accession | Mature Sequence         | apoB   |        | apoAI  |        |
|-------------------|------------------|-------------------------|--------|--------|--------|--------|
|                   |                  |                         | plate1 | plate2 | plate1 | plate2 |
| hsa-let-7a-2-3p   | MIMAT0010195     | CUGUACAGCCUCCUAGCUUUC   | 110.79 | 94.94  | 114.44 | 102.87 |
| hsa-let-7a-3p     | MIMAT0004481     | CUAUACAAUCUACUGUCUUUC   | 112.31 | 86.33  | 73.30  | 59.51  |
| hsa-let-7a-5p     | MIMAT0000062     | UGAGGUAGUAGGUUGUAUAGUU  | 35.73  | 56.36  | 72.34  | 83.45  |
| hsa-let-7b-3p     | MIMAT0004482     | CUAUACAACCUACUGCCUUC    | 105.54 | 109.86 | 90.36  | 91.48  |
| hsa-let-7b-5p     | MIMAT0000063     | UGAGGUAGUAGGUUGUGUGUU   | 77.29  | 57.43  | 107.87 | 115.59 |
| hsa-let-7c        | MIMAT0000064     | UGAGGUAGUAGGUUGUAUGUU   | 67.69  | 62.76  | 78.38  | 70.12  |
| hsa-let-7c*       | MIMAT0004483     | UAGAGUUACACCCUGGGAGUUA  | 89.15  | 94.94  | 114.44 | 107.62 |
| hsa-let-7d-3p     | MIMAT0004484     | CUAUACGACCUGCUGCCUUUCU  | 158.43 | 246.59 | 91.70  | 95.20  |
| hsa-let-7d-5p     | MIMAT0000065     | AGAGGUAGUAGGUUGCAUAGUU  | 32.34  | 31.45  | 62.74  | 39.59  |
| hsa-let-7e-3p     | MIMAT0004485     | CUAUACGGCCUCCUAGCUUUC   | 125.04 | 144.66 | 96.92  | 102.60 |
| hsa-let-7e-5p     | MIMAT0000066     | UGAGGUAGGAGGUUGUAUAGUU  | 78.48  | 67.11  | 89.71  | 77.22  |
| hsa-let-7f-1-3p   | MIMAT0004486     | CUAUACAAUCUAUUGCCUUC    | 122.09 | 92.95  | 100.81 | 95.83  |
| hsa-let-7f-2-3p   | MIMAT0004487     | CUAUACAGUCUACUGUCUUUC   | 138.71 | 148.89 | 93.54  | 97.85  |
| hsa-let-7f-5p     | MIMAT0000067     | UGAGGUAGUAGAUUGUAUAGUU  | 72.94  | 71.62  | 60.78  | 71.53  |
| hsa-let-7g-3p     | MIMAT0004584     | CUGUACAGGCCACUGCCUUGC   | 69.96  | 67.38  | 110.83 | 99.48  |
| hsa-let-7g-5p     | MIMAT0000414     | UGAGGUAGUAGUUUGUACAGUU  | 55.08  | 35.56  | 91.47  | 83.59  |
| hsa-let-7i-3p     | MIMAT0004585     | CUGCGCAAGCUACUGCCUUGC   | 86.46  | 92.51  | 108.30 | 108.19 |
| hsa-let-7i-5p     | MIMAT0000415     | UGAGGUAGUAGUUUGUGCUGUU  | 35.04  | 32.74  | 64.23  | 51.90  |
| hsa-miR-1         | MIMAT0000416     | UGGAAUGUAAAGAAGUAUGUAU  | 144.14 | 142.57 | 125.78 | 120.96 |
| hsa-miR-100-3p    | MIMAT0004512     | CAAGCUUGUAUCUAUAGGUAUG  | 102.52 | 82.20  | 100.81 | 113.61 |
| hsa-miR-100-5p    | MIMAT0000098     | AACCCGUAGAUCGGAACUUGUG  | 107.18 | 111.45 | 102.86 | 80.38  |
| hsa-miR-101-3p    | MIMAT0000099     | UACAGUACUGUGUAACUGAA    | 107.83 | 106.29 | 94.22  | 81.17  |
| hsa-miR-101-5p    | MIMAT0004513     | CAGUUAUCACAGUGCUGAUGCU  | 47.51  | 60.73  | 67.47  | 70.52  |
| hsa-miR-103a-2-5p | MIMAT0009196     | AGCUUCUUUACAGUGCUGCCUUG | 87.04  | 114.00 | 94.41  | 92.61  |
| hsa-miR-103a-3p   | MIMAT0000101     | AGCAGCAUUGUACAGGGCUAUGA | 93.20  | 105.24 | 79.17  | 81.24  |
| hsa-miR-103b      | MIMAT0007402     | UCAUAGCCCUGUACAAUGCUGCU | 91.33  | 92.95  | 125.87 | 122.49 |
| hsa-miR-105-3p    | MIMAT0004516     | ACGGAUGUUUGAGCAUGUGCUA  | 162.70 | 201.90 | 107.31 | 122.44 |
| hsa-miR-105-5p    | MIMAT0000102     | UCAAAUGCUCAGACUCCUGUGGU | 89.81  | 80.09  | 82.59  | 115.36 |
| hsa-miR-106a-3p   | MIMAT0004517     | CUGCAAUGUAAGCACUUCUAC   | 100.65 | 91.42  | 71.76  | 71.72  |
| hsa-miR-106a-5p   | MIMAT0000103     | AAAAGUGCUUACAGUGCAGGUAG | 130.76 | 120.29 | 91.17  | 123.07 |
| hsa-miR-106b-3p   | MIMAT0004672     | CCGCACUGUGGGUACUUGCUGC  | 42.28  | 41.93  | 101.74 | 71.50  |
| hsa-miR-106b-5p   | MIMAT0000680     | UAAAGUGCUGACAGUGCAGAU   | 105.69 | 78.40  | 119.00 | 137.63 |
| hsa-miR-107       | MIMAT0000104     | AGCAGCAUUGUACAGGGCUAUCA | 152.95 | 152.07 | 93.21  | 120.04 |
| hsa-miR-10a-3p    | MIMAT0004555     | CAAAUUCGUAUCUAGGGGAAUA  | 112.50 | 89.12  | 107.03 | 85.44  |
| hsa-miR-10a-5p    | MIMAT0000253     | UACCCUGUAGAUCGAAUUUGUG  | 111.97 | 124.33 | 90.01  | 79.79  |
| hsa-miR-10b-3p    | MIMAT0004556     | ACAGAUUCGAUUCUAGGGGAAU  | 138.06 | 125.51 | 96.13  | 76.86  |
| hsa-miR-10b-5p    | MIMAT0000254     | UACCCUGUAGAACGAAUUUGUG  | 110.05 | 109.81 | 111.83 | 81.95  |
| hsa-miR-1178-3p   | MIMAT0005823     | UUGCUCACUGUUCUCCCUAG    | 116.70 | 96.58  | 101.86 | 91.31  |
| hsa-miR-1179      | MIMAT0005824     | AAGCAUUCUUCUUCUUGGUUGG  | 113.16 | 124.38 | 102.85 | 112.60 |

|                 |              |                             |        |        |        |        |
|-----------------|--------------|-----------------------------|--------|--------|--------|--------|
| hsa-miR-1180    | MIMAT0005825 | UUUCCGGCUCGCGUGGGUGUGU      | 95.23  | 86.33  | 78.32  | 84.34  |
| hsa-miR-1181    | MIMAT0005826 | CCGUCGCCGCCACCCGAGCCG       | 122.09 | 106.78 | 105.94 | 82.51  |
| hsa-miR-1182    | MIMAT0005827 | GAGGGUCUUGGGAGGGAUGUGAC     | 138.79 | 128.61 | 126.82 | 128.87 |
| hsa-miR-1183    | MIMAT0005828 | CACUGUAGGUGAUGGUGAGAGUGGGCA | 52.19  | 45.32  | 64.36  | 59.02  |
| hsa-miR-1184    | MIMAT0005829 | CCUGCAGCGACUUGAUGGCUUCC     | 144.95 | 126.62 | 95.92  | 122.56 |
| hsa-miR-1184    | MIMAT0005829 | CCUGCAGCGACUUGAUGGCUUCC     | 129.95 | 123.14 | 91.66  | 112.83 |
| hsa-miR-1185-5p | MIMAT0005798 | AGAGGAUACCCUUUGUAUGUU       | 94.13  | 79.12  | 104.80 | 114.24 |
| hsa-miR-1193    | MIMAT0015049 | GGGAUGGUAGACCGGUGACGUGC     | 118.45 | 81.94  | 95.19  | 81.56  |
| hsa-miR-1197    | MIMAT0005955 | UAGGACACAUGGUCUACUUCU       | 113.14 | 88.51  | 119.20 | 99.16  |
| hsa-miR-1200    | MIMAT0005863 | CUCCUGAGCCAUCUGAGCCUC       | 28.99  | 31.74  | 145.08 | 155.96 |
| hsa-miR-1201    | MIMAT0005864 | AGCCUGAUUAAACACAUGCUCUGA    | 82.47  | 111.85 | 83.60  | 78.97  |
| hsa-miR-1202    | MIMAT0005865 | GUGCCAGCUGCAGUGGGGAG        | 75.58  | 65.19  | 112.88 | 98.47  |
| hsa-miR-1203    | MIMAT0005866 | CCCGGAGCCAGGAUGCAGCUC       | 135.30 | 129.60 | 134.57 | 130.80 |
| hsa-miR-1204    | MIMAT0005868 | UCGUGGCCUGGUCUCCAUUAU       | 85.73  | 109.22 | 106.35 | 102.34 |
| hsa-miR-1205    | MIMAT0005869 | UCUGCAGGGUUUGCUUUGAG        | 83.53  | 96.30  | 108.09 | 106.54 |
| hsa-miR-1206    | MIMAT0005870 | UGUUCAUGUAGAUGUUUAAGC       | 62.56  | 77.76  | 63.54  | 58.24  |
| hsa-miR-1207-3p | MIMAT0005872 | UCAGCUGGCCUCAUUUC           | 61.40  | 60.18  | 113.17 | 95.95  |
| hsa-miR-1207-5p | MIMAT0005871 | UGGCAGGGAGGCUGGGAGGGG       | 112.87 | 117.90 | 151.94 | 123.51 |
| hsa-miR-1208    | MIMAT0005873 | UCACUGUUCAGACAGGCGGA        | 114.87 | 109.58 | 151.91 | 161.83 |
| hsa-miR-122-3p  | MIMAT0004590 | AACGCCAUUAUCACACUAAAUA      | 114.53 | 99.16  | 87.63  | 104.83 |
| hsa-miR-1224-3p | MIMAT0005459 | CCCCACCUCUCUCUCCUCAG        | 84.09  | 100.83 | 93.28  | 100.31 |
| hsa-miR-1224-5p | MIMAT0005458 | GUGAGGACUCGGGAGGUGG         | 86.15  | 78.45  | 104.32 | 102.15 |
| hsa-miR-1225-3p | MIMAT0005573 | UGAGCCCCUGUGCCGCCCCAG       | 96.94  | 99.01  | 112.33 | 107.03 |
| hsa-miR-1225-5p | MIMAT0005572 | GUGGGUACGGCCAGUGGGGGG       | 131.99 | 140.53 | 102.55 | 92.98  |
| hsa-miR-122-5p  | MIMAT0000421 | UGGAGUGUGACAAUGGUGUUUG      | 123.66 | 141.89 | 94.10  | 115.04 |
| hsa-miR-1226-3p | MIMAT0005577 | UCACCAGCCCUGUGUCCCUAG       | 96.52  | 85.57  | 98.76  | 104.73 |
| hsa-miR-1226-5p | MIMAT0005576 | GUGAGGGCAUGCAGGCCUGGAUGGGG  | 136.29 | 122.54 | 111.73 | 135.94 |
| hsa-miR-1227-3p | MIMAT0005580 | CGUGCCACCCUUUCCCCAG         | 102.71 | 126.71 | 126.08 | 149.56 |
| hsa-miR-1228-3p | MIMAT0005583 | UCACACCUGCCUCGCCCCC         | 166.12 | 150.46 | 140.76 | 137.86 |
| hsa-miR-1228-5p | MIMAT0005582 | GUGGGCGGGGCAGGUGUGUG        | 101.82 | 104.19 | 103.67 | 155.07 |
| hsa-miR-1229-3p | MIMAT0005584 | CUCUCACCACUGCCUCCACAG       | 83.85  | 99.11  | 105.37 | 102.92 |
| hsa-miR-1231    | MIMAT0005586 | GUGUCUGGGCGGACAGCUGC        | 140.49 | 134.25 | 75.53  | 78.78  |
| hsa-miR-1233-3p | MIMAT0005588 | UGAGCCCUGUCCUCCCGCAG        | 66.51  | 70.96  | 99.71  | 102.70 |
| hsa-miR-1233-3p | MIMAT0005588 | UGAGCCCUGUCCUCCCGCAG        | 76.74  | 64.70  | 109.18 | 101.08 |
| hsa-miR-1234-3p | MIMAT0005589 | UCGGCCUGACCACCCACCCAC       | 101.30 | 96.12  | 113.06 | 121.44 |
| hsa-miR-1236-3p | MIMAT0005591 | CCUCUCCCCUUGUCUCUCCAG       | 134.26 | 123.35 | 122.18 | 115.82 |
| hsa-miR-1237-3p | MIMAT0005592 | UCCUUCUGCUCCGUCCCCAG        | 63.63  | 72.23  | 98.39  | 128.44 |
| hsa-miR-1238-3p | MIMAT0005593 | CUUCCUCGUCUGUCUGCCCC        | 107.18 | 97.60  | 85.01  | 35.11  |
| hsa-miR-1243    | MIMAT0005894 | AACUGGAUCAAUUAUAGGAGUG      | 119.29 | 108.32 | 56.96  | 22.21  |
| hsa-miR-124-3p  | MIMAT0000422 | UAAGGCACGCGGUGAAUGCC        | 85.48  | 81.06  | 100.65 | 109.74 |
| hsa-miR-1244    | MIMAT0005896 | AAGUAGUUGGUUUGUAUGAGAUGGUU  | 99.83  | 80.53  | 85.69  | 101.62 |

|                   |              |                            |        |        |        |        |
|-------------------|--------------|----------------------------|--------|--------|--------|--------|
| hsa-miR-1244      | MIMAT0005896 | AAGUAGUUGGUUUGUAUGAGAUGGUU | 73.40  | 91.43  | 91.12  | 106.18 |
| hsa-miR-1245a     | MIMAT0005897 | AAGUGAUCUAAAGGCCUACAU      | 141.91 | 145.35 | 113.00 | 129.59 |
| hsa-miR-124-5p    | MIMAT0004591 | CGUGUUCACAGCGGACCUUGAU     | 39.80  | 37.58  | 93.96  | 99.34  |
| hsa-miR-1246      | MIMAT0005898 | AAUGGAUUUUUGGAGCAGG        | 86.87  | 106.17 | 103.77 | 110.50 |
| hsa-miR-1247-5p   | MIMAT0005899 | ACCCGUCCCGUUCGUCCCGGA      | 95.76  | 130.95 | 105.47 | 87.89  |
| hsa-miR-1248      | MIMAT0005900 | ACCUUCUUGUAUAAGCACUGUCUAAA | 110.60 | 90.56  | 114.00 | 80.92  |
| hsa-miR-1249      | MIMAT0005901 | ACGCCUUCUUUUUUUUUUUCA      | 80.02  | 96.24  | 93.06  | 108.84 |
| hsa-miR-1250      | MIMAT0005902 | ACGGUGCUGGAUGUGGCCUUU      | 71.49  | 61.09  | 110.40 | 94.68  |
| hsa-miR-1251      | MIMAT0005903 | ACUCUAGCUGCCAAAGGCGCU      | 121.16 | 116.00 | 107.65 | 106.62 |
| hsa-miR-1252      | MIMAT0005944 | AGAAGGAAAUUGAAUUCAUUUA     | 126.57 | 104.36 | 127.72 | 113.14 |
| hsa-miR-1253      | MIMAT0005904 | AGAGAAGAAGAUACGCCUGCA      | 102.13 | 80.01  | 72.53  | 84.02  |
| hsa-miR-1254      | MIMAT0005905 | AGCCUGGAAGCUGGAGCCUGCAGU   | 49.17  | 59.73  | 83.65  | 99.30  |
| hsa-miR-1255a     | MIMAT0005906 | AGGAUGAGCAAAGAAAGUAGAUU    | 88.54  | 80.66  | 107.65 | 118.68 |
| hsa-miR-1255b-5p  | MIMAT0005945 | CGGAUGAGCAAAGAAAGUGGUU     | 74.20  | 67.39  | 109.32 | 98.34  |
| hsa-miR-1256      | MIMAT0005907 | AGGCAUUGACUUCUCACUAGCU     | 38.12  | 42.15  | 72.95  | 79.25  |
| hsa-miR-1257      | MIMAT0005908 | AGUGAAUGAUGGGUUCUGACC      | 197.57 | 160.70 | 135.85 | 123.64 |
| hsa-miR-1258      | MIMAT0005909 | AGUUAGGAUUAGGUCGUGGAA      | 179.87 | 232.76 | 108.22 | 116.78 |
| hsa-miR-1259      | MIMAT0005910 | AUAUAUGAUGACUUAGCUUUU      | 76.42  | 94.49  | 83.16  | 92.03  |
| hsa-miR-125a-3p   | MIMAT0004602 | ACAGGUGAGGUUCUUGGGAGCC     | 66.15  | 67.12  | 104.32 | 117.84 |
| hsa-miR-125a-5p   | MIMAT0000443 | UCCCUGAGACCCUUUAACCUGUGA   | 88.45  | 101.98 | 97.01  | 95.28  |
| hsa-miR-125b-1-3p | MIMAT0004592 | ACGGGUUAGGCUCUUGGGAGCU     | 110.90 | 129.83 | 87.71  | 102.82 |
| hsa-miR-125b-2-3p | MIMAT0004603 | UCACAAGUCAGGCUCUUGGGAC     | 65.00  | 51.04  | 62.15  | 88.87  |
| hsa-miR-125b-5p   | MIMAT0000423 | UCCCUGAGACCCUAACUUGUGA     | 62.52  | 83.48  | 73.26  | 115.05 |
| hsa-miR-1260a     | MIMAT0005911 | AUCCACCUCUGCCACCA          | 171.48 | 169.77 | 102.52 | 111.07 |
| hsa-miR-1260b     | MIMAT0015041 | AUCCACCACUGCCACCAU         | 93.11  | 103.66 | 115.34 | 121.75 |
| hsa-miR-1261      | MIMAT0005913 | AUGGAUAAGGCUUUGGCUU        | 76.42  | 92.95  | 100.24 | 102.82 |
| hsa-miR-1262      | MIMAT0005914 | AUGGGUGAAUUUGUAGAAGGAU     | 66.49  | 63.99  | 96.22  | 79.39  |
| hsa-miR-1263      | MIMAT0005915 | AUGGUACCCUGGCAUACUGAGU     | 102.52 | 103.71 | 129.86 | 137.72 |
| hsa-miR-126-3p    | MIMAT0000445 | UCGUACCGUGAGUAAUUAUGCG     | 112.30 | 124.65 | 118.57 | 101.17 |
| hsa-miR-1264      | MIMAT0005791 | CAAGUCUUAUUUGAGCACCUGUU    | 138.86 | 129.83 | 59.80  | 52.68  |
| hsa-miR-1265      | MIMAT0005918 | CAGGAUGUGGUCAAGUGUUGUU     | 134.20 | 146.73 | 105.37 | 107.89 |
| hsa-miR-126-5p    | MIMAT0000444 | CAUUUUUACUUUUGGUACGCG      | 113.16 | 90.56  | 103.41 | 78.35  |
| hsa-miR-1266      | MIMAT0005920 | CCUCAGGGCUGUAGAACAGGGCU    | 134.15 | 118.21 | 95.23  | 85.17  |
| hsa-miR-1267      | MIMAT0005921 | CCUGUUGAAGUGUAAUCCCA       | 110.76 | 101.11 | 107.61 | 108.03 |
| hsa-miR-1268a     | MIMAT0005922 | CGGGCGUGGUGGUGGGGG         | 94.84  | 100.76 | 73.66  | 78.84  |
| hsa-miR-1269a     | MIMAT0005923 | CUGGACUGAGCCGUGCUACUGG     | 59.36  | 21.49  | 80.55  | 48.38  |
| hsa-miR-1270      | MIMAT0005924 | CUGGAGAUUAUGGAAGAGCUGUGU   | 125.32 | 138.58 | 88.91  | 81.83  |
| hsa-miR-1270      | MIMAT0005924 | CUGGAGAUUAUGGAAGAGCUGUGU   | 118.58 | 138.58 | 81.45  | 81.40  |
| hsa-miR-1271-5p   | MIMAT0005796 | CUUGGCACCUAGCAAGCACUCA     | 99.97  | 110.28 | 82.76  | 115.02 |
| hsa-miR-1272      | MIMAT0005925 | GAUGAUGAUGGCAGCAAUUCUGAAA  | 141.70 | 139.97 | 163.23 | 134.14 |
| hsa-miR-1273a     | MIMAT0005926 | GGGCGACAAAGCAAGACUCUUUCU   | 135.71 | 143.44 | 83.52  | 110.63 |

|                  |              |                           |        |        |        |        |
|------------------|--------------|---------------------------|--------|--------|--------|--------|
| hsa-miR-1273c    | MIMAT0015017 | GGCGACAAAACGAGACCCUGUC    | 130.63 | 118.27 | 106.82 | 117.69 |
| hsa-miR-1273d    | MIMAT0015090 | GAACCCAUGAGGUUGAGGCUGCAGU | 97.89  | 94.62  | 97.34  | 86.90  |
| hsa-miR-1273e    | MIMAT0018079 | UUGCUUGAACCCAGGAAGUGGA    | 70.09  | 81.33  | 79.73  | 77.49  |
| hsa-miR-127-3p   | MIMAT0000446 | UCGGAUCCGUCUGAGCUUGGCU    | 67.87  | 73.75  | 68.92  | 79.61  |
| hsa-miR-1274a    | MIMAT0005927 | GUCCUGUUCAGGCGCCA         | 89.33  | 96.24  | 94.77  | 111.23 |
| hsa-miR-1274b    | MIMAT0005938 | UCCUGUUCGGGCGCCA          | 109.93 | 126.62 | 111.55 | 104.07 |
| hsa-miR-1275     | MIMAT0005929 | GUGGGGGAGAGGCUGUC         | 25.09  | 44.86  | 79.58  | 120.32 |
| hsa-miR-127-5p   | MIMAT0004604 | CUGAAGCUCAGAGGGCUCUGAU    | 88.18  | 130.82 | 70.19  | 70.88  |
| hsa-miR-1276     | MIMAT0005930 | UAAAGAGCCUGUGGAGACA       | 159.21 | 175.34 | 102.31 | 120.83 |
| hsa-miR-1277-3p  | MIMAT0005933 | UACGUAGAUUAUAUGUAUUUU     | 112.99 | 115.43 | 106.71 | 100.13 |
| hsa-miR-1278     | MIMAT0005936 | UAGUACUGUGCAUAUCAUCAU     | 98.64  | 97.59  | 110.61 | 119.82 |
| hsa-miR-1279     | MIMAT0005937 | UCAUAUUGCUUCUUUCU         | 169.64 | 159.80 | 117.45 | 112.66 |
| hsa-miR-128      | MIMAT0000424 | UCACAGUGAACGGUCUCUUU      | 119.68 | 102.74 | 94.52  | 90.63  |
| hsa-miR-1280     | MIMAT0005946 | UCCCACCGCUGCCACCC         | 88.40  | 80.08  | 108.55 | 113.85 |
| hsa-miR-1281     | MIMAT0005939 | UCGCCUCCUCCUCUCCC         | 90.29  | 83.83  | 107.03 | 121.36 |
| hsa-miR-1282     | MIMAT0005940 | UCGUUUGCCUUUUUCUGCUU      | 118.45 | 134.23 | 110.53 | 99.21  |
| hsa-miR-1283     | MIMAT0005799 | UCUACAAAGGAAAGCGCUUUUCU   | 140.73 | 129.83 | 103.66 | 114.24 |
| hsa-miR-1284     | MIMAT0005941 | UCUAUACAGACCCUGGCUUUUC    | 109.30 | 90.73  | 101.22 | 99.81  |
| hsa-miR-1285-3p  | MIMAT0005876 | UCUGGGCAACAAAGUGAGACCU    | 89.47  | 97.56  | 80.31  | 101.55 |
| hsa-miR-1286     | MIMAT0005877 | UGCAGGACCAAGAUGAGCCCU     | 88.16  | 82.27  | 88.36  | 106.93 |
| hsa-miR-1287     | MIMAT0005878 | UGCUGGAUCAGUGGUUCGAGUC    | 100.35 | 99.72  | 100.06 | 123.73 |
| hsa-miR-1288     | MIMAT0005942 | UGGACUGCCUGAUCUGGAGA      | 125.82 | 105.24 | 84.86  | 78.06  |
| hsa-miR-1289     | MIMAT0005879 | UGGAGUCCAGGAAUCUGCAUUUU   | 102.96 | 79.43  | 92.91  | 81.85  |
| hsa-miR-1290     | MIMAT0005880 | UGGAUUUUUGGAUCAGGGA       | 129.92 | 136.08 | 100.39 | 110.04 |
| hsa-miR-1291     | MIMAT0005881 | UGGCCUGACUGAAGACCAGCAGU   | 125.63 | 98.77  | 126.67 | 110.42 |
| hsa-miR-129-1-3p | MIMAT0004548 | AAGCCCUUACCCCAAAAAGUAU    | 147.09 | 133.17 | 127.98 | 123.87 |
| hsa-miR-129-2-3p | MIMAT0004605 | AAGCCCUUACCCCAAAAAGCAU    | 130.20 | 145.87 | 116.12 | 118.43 |
| hsa-miR-1292-5p  | MIMAT0005943 | UGGGAACGGGUUCCGGCAGACGCUG | 114.12 | 114.84 | 156.17 | 136.96 |
| hsa-miR-1293     | MIMAT0005883 | UGGGUGGUCUGGAGAUUUGUGC    | 42.19  | 34.36  | 119.24 | 138.84 |
| hsa-miR-1294     | MIMAT0005884 | UGUGAGGUUGGCAUUGUUGUCU    | 36.74  | 33.06  | 62.19  | 72.23  |
| hsa-miR-1295a    | MIMAT0005885 | UUAGGCCGCAGAUCUGGGUGA     | 116.97 | 105.37 | 108.17 | 91.69  |
| hsa-miR-129-5p   | MIMAT0000242 | CUUUUUGCGGUCUGGGCUUGC     | 127.86 | 101.94 | 107.82 | 115.57 |
| hsa-miR-1296     | MIMAT0005794 | UUAGGGCCCUGGCUCCAUCUCC    | 135.30 | 130.50 | 99.05  | 87.84  |
| hsa-miR-1297     | MIMAT0005886 | UUCAAGUAAUUCAGGUG         | 67.92  | 63.87  | 80.62  | 83.49  |
| hsa-miR-1298     | MIMAT0005800 | UUCAUUCGGCUGUCCAGAUGUA    | 131.10 | 120.16 | 115.11 | 128.44 |
| hsa-miR-1299     | MIMAT0005887 | UUCUGGAAUUCUGUGUGAGGGA    | 177.44 | 151.54 | 96.24  | 102.34 |
| hsa-miR-1300     | MIMAT0005888 | UUGAGAAGGAGGCUGCUG        | 130.16 | 110.81 | 72.64  | 78.04  |
| hsa-miR-1301     | MIMAT0005797 | UUGCAGCUGCCUGGGAGUGACUUC  | 99.24  | 97.89  | 106.40 | 82.57  |
| hsa-miR-1302     | MIMAT0005890 | UUGGGACAUACUUAUGCUIAAA    | 98.92  | 120.50 | 76.87  | 108.47 |
| hsa-miR-1302     | MIMAT0005890 | UUGGGACAUACUUAUGCUIAAA    | 109.87 | 107.42 | 94.54  | 110.95 |
| hsa-miR-1303     | MIMAT0005891 | UUUAGAGACGGGGUCUUGCUCU    | 130.73 | 124.03 | 112.08 | 128.49 |

|                  |              |                          |        |        |        |        |
|------------------|--------------|--------------------------|--------|--------|--------|--------|
| hsa-miR-1304-5p  | MIMAT0005892 | UUUGAGGCUACAGUGAGAUGUG   | 67.90  | 64.48  | 93.93  | 95.04  |
| hsa-miR-1305     | MIMAT0005893 | UUUUCAACUCUAAUGGGAGAGA   | 127.16 | 113.37 | 84.08  | 106.46 |
| hsa-miR-1306-3p  | MIMAT0005950 | ACGUUGGCUCUGGUGGUG       | 84.02  | 78.02  | 110.74 | 122.94 |
| hsa-miR-1307-3p  | MIMAT0005951 | ACUCGGCGUGGCGUCGGUCGUG   | 84.09  | 98.50  | 120.45 | 87.36  |
| hsa-miR-1308     | MIMAT0005947 | GCAUGGGUGGUUCAGUGG       | 122.50 | 119.68 | 100.34 | 112.19 |
| hsa-miR-130a-3p  | MIMAT0000425 | CAGUGCAAUGUAAAAGGGCAU    | 175.16 | 213.42 | 115.12 | 111.32 |
| hsa-miR-130a-5p  | MIMAT0004593 | UUCACAUUGUGCUACUGUCUGC   | 101.58 | 74.52  | 89.42  | 86.31  |
| hsa-miR-130b-3p  | MIMAT0000691 | CAGUGCAAUGAUGAAAGGGCAU   | 121.07 | 141.58 | 120.69 | 86.88  |
| hsa-miR-130b-5p  | MIMAT0004680 | ACUCUUUCCUGUUGCACUAC     | 115.73 | 115.22 | 51.01  | 66.79  |
| hsa-miR-1321     | MIMAT0005952 | CAGGGAGGUGAAUGUGAU       | 51.50  | 68.29  | 86.22  | 89.75  |
| hsa-miR-1322     | MIMAT0005953 | GAUGAUGCUGCUGAUGCUG      | 81.08  | 76.05  | 88.85  | 76.16  |
| hsa-miR-1323     | MIMAT0005795 | UCAAAACUGAGGGGCAUUUUCU   | 79.22  | 66.83  | 113.34 | 125.66 |
| hsa-miR-132-3p   | MIMAT0000426 | U AACAGUCUACAGCCAUGGUCG  | 138.93 | 154.68 | 84.13  | 97.21  |
| hsa-miR-1324     | MIMAT0005956 | CCAGACAGAAUUCUAUGCACUUUC | 120.17 | 134.11 | 117.88 | 115.53 |
| hsa-miR-132-5p   | MIMAT0004594 | ACCGUGGCUUUCGAUUGUUACU   | 75.49  | 89.88  | 105.94 | 116.14 |
| hsa-miR-133a     | MIMAT0000427 | UUUGGUCCCCUUAACCAGCUG    | 99.46  | 112.98 | 79.75  | 69.91  |
| hsa-miR-133b     | MIMAT0000770 | UUUGGUCCCCUUAACCAGCUA    | 142.29 | 185.05 | 118.31 | 104.55 |
| hsa-miR-134      | MIMAT0000447 | UGUGACUGGUUGACCAGAGGGG   | 91.39  | 97.33  | 102.40 | 93.98  |
| hsa-miR-135a-3p  | MIMAT0004595 | UAUAGGGAUUGGAGCCGUGGCG   | 124.92 | 128.04 | 96.87  | 84.85  |
| hsa-miR-135a-5p  | MIMAT0000428 | UAUGGCUUUUAUCCUAUGUGA    | 84.81  | 71.44  | 46.70  | 38.71  |
| hsa-miR-135b-3p  | MIMAT0004698 | AUGUAGGGCUAAAAGCCAUGGG   | 102.13 | 103.45 | 96.49  | 112.19 |
| hsa-miR-135b-5p  | MIMAT0000758 | UAUGGCUUUUCAUCCUAUGUGA   | 69.21  | 80.66  | 90.85  | 77.25  |
| hsa-miR-136-3p   | MIMAT0004606 | CAUCAUCGUCUCAAUGAGUCU    | 109.04 | 97.56  | 74.61  | 62.83  |
| hsa-miR-136-5p   | MIMAT0000448 | ACUCCAUUUGUUUGAUGAUGGA   | 109.99 | 122.90 | 97.74  | 97.25  |
| hsa-miR-137      | MIMAT0000429 | UUAUUGCUUAAGAAUACGCGUAG  | 116.59 | 99.52  | 80.64  | 64.36  |
| hsa-miR-138-1-3p | MIMAT0004607 | GCUACUUCACAACACCAGGGCC   | 95.41  | 99.17  | 111.75 | 103.93 |
| hsa-miR-138-2-3p | MIMAT0004596 | GCUAUUUCACGACACCAGGGUU   | 100.39 | 84.97  | 93.49  | 108.37 |
| hsa-miR-138-5p   | MIMAT0000430 | AGCUGGUGUUGUGAAUCAGGCCG  | 75.53  | 66.62  | 76.18  | 88.27  |
| hsa-miR-139-3p   | MIMAT0004552 | GGAGACGCGGCCUGUUGGAGU    | 78.33  | 86.48  | 124.22 | 117.39 |
| hsa-miR-139-5p   | MIMAT0000250 | UCUACAGUGCACGUGUCUCCAG   | 68.75  | 29.95  | 77.76  | 46.24  |
| hsa-miR-140-3p   | MIMAT0004597 | UACCACAGGGUAGAACCACGG    | 161.52 | 168.23 | 90.07  | 112.61 |
| hsa-miR-140-5p   | MIMAT0000431 | CAGUGGUUUUACCCUAUGGUAG   | 106.14 | 122.03 | 93.72  | 79.92  |
| hsa-miR-141-3p   | MIMAT0000432 | UAACACUGUCUGGUAAAGAUGG   | 96.55  | 97.06  | 99.61  | 114.49 |
| hsa-miR-141-5p   | MIMAT0004598 | CAUCUCCAGUACAGUGUUGGA    | 87.00  | 86.32  | 60.12  | 57.76  |
| hsa-miR-142-3p   | MIMAT0000434 | UGUAGUGUUCCUACUUUAUGGA   | 135.31 | 126.32 | 88.46  | 84.83  |
| hsa-miR-142-5p   | MIMAT0000433 | CAUAAAGUAGAAAGCACUACU    | 114.35 | 119.68 | 93.92  | 83.06  |
| hsa-miR-143-3p   | MIMAT0000435 | UGAGAUGAAGCACUGUAGCUC    | 97.71  | 121.47 | 83.17  | 103.36 |
| hsa-miR-143-5p   | MIMAT0004599 | GGUGCAGUGCUGCAUCUCUGGU   | 123.05 | 106.37 | 80.10  | 89.82  |
| hsa-miR-144-3p   | MIMAT0000436 | UACAGUAUAGAUGAUGUACU     | 161.18 | 167.61 | 82.85  | 83.90  |
| hsa-miR-144-5p   | MIMAT0004600 | GGUAUCAUCAUAUACUGUAAG    | 112.14 | 121.62 | 130.25 | 112.25 |
| hsa-miR-145-3p   | MIMAT0004601 | GGAUUCCUGGAAAUACUGUUCU   | 53.83  | 42.58  | 110.06 | 106.57 |

|                   |              |                         |        |        |        |        |
|-------------------|--------------|-------------------------|--------|--------|--------|--------|
| hsa-miR-145-5p    | MIMAT0000437 | GUCCAGUUUCCCCAGGAAUCCCU | 112.60 | 116.38 | 121.53 | 135.30 |
| hsa-miR-1468      | MIMAT0006789 | CUCCGUUUGCCUGUUUCGCUG   | 73.03  | 65.59  | 84.08  | 100.25 |
| hsa-miR-1469      | MIMAT0007347 | CUCGGCGCGGGGCGGGGCUC    | 93.26  | 101.48 | 104.82 | 103.18 |
| hsa-miR-146a-3p   | MIMAT0004608 | CCUCUGAAAUCAGUUCUUCAG   | 116.68 | 102.55 | 71.67  | 87.84  |
| hsa-miR-146a-5p   | MIMAT0000449 | UGAGAACUGAAUCCAUGGGUU   | 149.05 | 142.62 | 98.29  | 118.51 |
| hsa-miR-146b-3p   | MIMAT0004766 | UGCCUGUGGACUCAGUUCUGG   | 103.50 | 113.79 | 125.67 | 112.21 |
| hsa-miR-146b-5p   | MIMAT0002809 | UGAGAACUGAAUCCAUGGCU    | 107.18 | 92.81  | 77.26  | 94.72  |
| hsa-miR-1470      | MIMAT0007348 | GCCCUCCGCCCGUGCACCCCG   | 71.76  | 76.05  | 117.90 | 123.76 |
| hsa-miR-1471      | MIMAT0007349 | GCCCGCGUGUGGAGCCAGGUGU  | 81.18  | 89.48  | 81.94  | 83.54  |
| hsa-miR-147a      | MIMAT0000251 | GUGUGUGGAAAUGCUUCUGC    | 116.76 | 96.30  | 102.04 | 96.89  |
| hsa-miR-147b      | MIMAT0004928 | GUGUGCGGAAAUGCUUCUGCUA  | 41.11  | 57.15  | 107.15 | 104.58 |
| hsa-miR-148a-3p   | MIMAT0000243 | UCAGUGCACUACAGAACUUUGU  | 109.32 | 122.35 | 94.43  | 103.16 |
| hsa-miR-148a-5p   | MIMAT0004549 | AAAGUUCUGAGACACUCCGACU  | 109.66 | 84.33  | 75.58  | 80.63  |
| hsa-miR-148b-3p   | MIMAT0000759 | UCAGUGCAUCACAGAACUUUGU  | 123.55 | 90.26  | 125.26 | 126.32 |
| hsa-miR-148b-5p   | MIMAT0004699 | AAGUUCUGUUAUACACUCAGGC  | 89.47  | 96.02  | 63.22  | 53.95  |
| hsa-miR-149-3p    | MIMAT0004609 | AGGGAGGGACGGGGCUGUGC    | 88.79  | 126.88 | 95.20  | 79.10  |
| hsa-miR-149-5p    | MIMAT0000450 | UCUGGCUCCGUGUCUUCACUCCC | 97.27  | 103.45 | 98.92  | 105.58 |
| hsa-miR-150-3p    | MIMAT0004610 | CUGGUACAGGCCUGGGGGACAG  | 133.80 | 127.73 | 126.67 | 113.99 |
| hsa-miR-150-5p    | MIMAT0000451 | UCUCCAACCCUUGUACCAGUG   | 97.47  | 106.53 | 104.04 | 95.51  |
| hsa-miR-151a-3p   | MIMAT0000757 | CUAGACUGAAGCUCCUUGAGG   | 85.74  | 63.76  | 113.91 | 123.13 |
| hsa-miR-151a-5p   | MIMAT0004697 | UCGAGGAGCUCACAGUCUAGU   | 153.49 | 146.50 | 133.77 | 120.32 |
| hsa-miR-152       | MIMAT0000438 | UCAGUGCAUGACAGAACUUGG   | 177.78 | 149.43 | 82.79  | 108.37 |
| hsa-miR-153       | MIMAT0000439 | UUGCAUAGUCACAAAAGUGAUC  | 57.63  | 39.04  | 104.80 | 118.78 |
| hsa-miR-1537      | MIMAT0007399 | AAAACCGUCUAGUUACAGUUGU  | 135.14 | 123.68 | 140.11 | 145.34 |
| hsa-miR-1538      | MIMAT0007400 | CGGCCCGGGCUGCUGCUUCCU   | 90.29  | 75.90  | 112.08 | 111.85 |
| hsa-miR-1539      | MIMAT0007401 | UCCUGCGGUGCCAGAUGCCC    | 194.06 | 154.64 | 114.88 | 115.90 |
| hsa-miR-154-3p    | MIMAT0000453 | AAUCAUACACGGUUGACCUAUU  | 113.95 | 74.32  | 84.36  | 87.13  |
| hsa-miR-154-5p    | MIMAT0000452 | UAGGUUAUCCGUGUUGCCUUCG  | 84.17  | 100.90 | 89.06  | 87.46  |
| hsa-miR-155-3p    | MIMAT0004658 | CUCCUACAUAUUAGCAUUAACA  | 128.61 | 139.04 | 104.23 | 111.07 |
| hsa-miR-155-5p    | MIMAT0000646 | UUAUUGCUAAUCGUGAUAGGGGU | 148.36 | 130.95 | 84.38  | 115.16 |
| hsa-miR-15a-3p    | MIMAT0004488 | CAGGCCAUUUUGUGCUGCCUCA  | 110.85 | 116.18 | 77.92  | 63.41  |
| hsa-miR-15a-5p    | MIMAT0000068 | UAGCAGCACAUAAUGGUUUUGUG | 104.58 | 85.91  | 73.92  | 87.59  |
| hsa-miR-15b-3p    | MIMAT0004586 | CGAAUCAUUAUUUGCUGCUCUA  | 177.07 | 165.16 | 129.29 | 135.82 |
| hsa-miR-15b-5p    | MIMAT0000417 | UAGCAGCACAUCAUGGUUUACA  | 69.16  | 88.37  | 86.77  | 82.99  |
| hsa-miR-16-1-3p   | MIMAT0004489 | CCAGUAUUAACUGUGCUGCUGA  | 116.50 | 89.88  | 101.95 | 93.30  |
| hsa-miR-16-2-3p   | MIMAT0004518 | CCAAUAUUACUGUGCUGCUUUA  | 80.60  | 67.44  | 85.79  | 76.46  |
| hsa-miR-16-5p     | MIMAT0000069 | UAGCAGCACGUAAAUAUUGGCG  | 68.47  | 70.77  | 75.07  | 90.15  |
| hsa-miR-17-3p     | MIMAT0000071 | ACUGCAGUGAAGGCACUUGUAG  | 73.85  | 80.73  | 109.66 | 103.18 |
| hsa-miR-17-5p     | MIMAT0000070 | CAAAGUGCUUACAGUGCAGGUAG | 95.94  | 87.30  | 85.46  | 102.44 |
| hsa-miR-181a-2-3p | MIMAT0004558 | ACCACUGACCGUUGACUGUACC  | 176.77 | 212.80 | 151.87 | 143.32 |
| hsa-miR-181a-3p   | MIMAT0000270 | ACCAUCGACCGUUGAUUGUACC  | 68.79  | 74.76  | 98.54  | 105.59 |

|                 |              |                             |        |        |        |        |
|-----------------|--------------|-----------------------------|--------|--------|--------|--------|
| hsa-miR-181a-5p | MIMAT0000256 | AACAUUCAACGCUGUCGGUGAGU     | 114.26 | 113.40 | 82.66  | 84.47  |
| hsa-miR-181b-5p | MIMAT0000257 | AACAUUCAUUGCUGUCGGUGGGU     | 119.01 | 94.44  | 108.04 | 89.75  |
| hsa-miR-181c-3p | MIMAT0004559 | AACCAUCGACCGUUGAGUGGAC      | 124.58 | 106.81 | 99.90  | 95.48  |
| hsa-miR-181c-5p | MIMAT0000258 | AACAUUCAACCUGUCGGUGAGU      | 95.95  | 91.75  | 74.66  | 85.13  |
| hsa-miR-181d    | MIMAT0002821 | AACAUUCAUUGUUGCUGGGUGU      | 173.03 | 156.59 | 83.97  | 92.51  |
| hsa-miR-182-3p  | MIMAT0000260 | UGGUUCUAGACUUGCCAACUA       | 75.49  | 76.05  | 82.02  | 93.93  |
| hsa-miR-1825    | MIMAT0006765 | UCCAGUGCCCUCCUCUCC          | 174.60 | 160.38 | 94.82  | 89.07  |
| hsa-miR-182-5p  | MIMAT0000259 | UUUGGCAAUGGUAGAACUCACACU    | 92.30  | 106.34 | 117.84 | 108.36 |
| hsa-miR-1826    | MIMAT0006766 | AUUGAUCAUCGACACUUCGAACGCAAU | 93.40  | 102.55 | 124.30 | 111.23 |
| hsa-miR-1827    | MIMAT0006767 | UGAGGCAGUAGAUUGAAU          | 76.05  | 78.02  | 92.87  | 102.87 |
| hsa-miR-183-3p  | MIMAT0004560 | GUGAAUUACCGAAGGGCCAUA       | 116.30 | 86.44  | 103.67 | 74.59  |
| hsa-miR-183-5p  | MIMAT0000261 | UAUGGCACUGGUAGAAUUCACU      | 106.08 | 90.86  | 112.04 | 93.19  |
| hsa-miR-184     | MIMAT0000454 | UGGACGGAGAACUGAUAAAGGGU     | 85.71  | 72.95  | 110.41 | 102.36 |
| hsa-miR-185-3p  | MIMAT0004611 | AGGGGCUGGCUUUCUCUGGUC       | 43.80  | 45.32  | 87.14  | 101.55 |
| hsa-miR-185-5p  | MIMAT0000455 | UGGAGAGAAAGGCAGUUCUGA       | 143.83 | 131.44 | 94.56  | 92.57  |
| hsa-miR-186-3p  | MIMAT0004612 | GCCCAAAGGUGAAUUUUUGGG       | 140.49 | 130.73 | 103.96 | 120.30 |
| hsa-miR-186-5p  | MIMAT0000456 | CAAAGAAUUCUCCUUUUGGGCU      | 128.58 | 107.84 | 115.34 | 86.50  |
| hsa-miR-187-3p  | MIMAT0000262 | UCGUGUCUUGUGUUGCAGCCGG      | 96.93  | 90.32  | 79.00  | 74.12  |
| hsa-miR-187-5p  | MIMAT0004561 | GGCUACAACACAGGACCCGGGC      | 91.43  | 71.14  | 114.11 | 118.98 |
| hsa-miR-188-3p  | MIMAT0004613 | CUCCACAUGCAGGGUUUGCA        | 69.78  | 74.84  | 72.98  | 69.06  |
| hsa-miR-188-5p  | MIMAT0000457 | CAUCCCUUGCAUGGUGGAGGG       | 130.25 | 129.52 | 83.63  | 79.40  |
| hsa-miR-18a-3p  | MIMAT0002891 | ACUGCCCUAAGUGCUCUUCUGG      | 79.51  | 94.85  | 101.41 | 110.02 |
| hsa-miR-18a-5p  | MIMAT0000072 | UAAGGUGCAUCUAGUGCAGAUAG     | 100.26 | 126.11 | 142.80 | 163.49 |
| hsa-miR-18b-3p  | MIMAT0004751 | UGCCCUAAAUGCCCUUCUGGC       | 90.40  | 116.00 | 129.86 | 127.57 |
| hsa-miR-18b-5p  | MIMAT0001412 | UAAGGUGCAUCUAGUGCAGUUAG     | 94.45  | 108.74 | 122.87 | 106.26 |
| hsa-miR-1908    | MIMAT0007881 | CGGCGGGACGGCGAUUGGUC        | 78.33  | 61.62  | 125.91 | 124.79 |
| hsa-miR-1909-3p | MIMAT0007883 | CGCAGGGGCCGGGUGCUCACCG      | 82.01  | 82.20  | 115.62 | 116.14 |
| hsa-miR-1909-5p | MIMAT0007882 | UGAGUGCCGGUGCCUGCCUG        | 143.40 | 132.64 | 110.58 | 92.84  |
| hsa-miR-190a    | MIMAT0000458 | UGAUUAUGUUUGAUUAUUAGGU      | 66.13  | 75.39  | 85.77  | 90.24  |
| hsa-miR-190b    | MIMAT0004929 | UGAUUAUGUUUGAUUAUUGGUU      | 78.15  | 63.78  | 97.83  | 98.47  |
| hsa-miR-1910    | MIMAT0007884 | CCAGUCCUGUGCCUGCCGCCU       | 138.86 | 123.68 | 109.92 | 110.43 |
| hsa-miR-1911-3p | MIMAT0007886 | CACCAGGCAUUGUGGUCUC         | 84.13  | 92.67  | 85.01  | 87.34  |
| hsa-miR-1911-5p | MIMAT0007885 | UGAGUACCGCCAUGUCUGUUGGG     | 111.36 | 127.21 | 94.56  | 97.06  |
| hsa-miR-1912    | MIMAT0007887 | UACCCAGAGCAUGCAGUGUGAA      | 71.29  | 81.37  | 91.78  | 99.77  |
| hsa-miR-1913    | MIMAT0007888 | UCUGCCCCUCCGUCUGCCA         | 88.32  | 105.52 | 120.42 | 104.02 |
| hsa-miR-191-3p  | MIMAT0001618 | GCUGCGCUUGGAUUUCGUCCCC      | 122.77 | 149.72 | 152.22 | 151.35 |
| hsa-miR-1914-3p | MIMAT0007890 | GGAGGGGUCCCGCACUGGGAGG      | 110.90 | 114.46 | 120.75 | 121.22 |
| hsa-miR-1914-5p | MIMAT0007889 | CCCUGUGCCCGGCCACUUCUG       | 125.63 | 126.14 | 106.16 | 110.82 |
| hsa-miR-1915-3p | MIMAT0007892 | CCCCAGGGCGACGCGGGGG         | 128.53 | 108.52 | 102.97 | 97.08  |
| hsa-miR-1915-5p | MIMAT0007891 | ACCUUGCCUUGCUGCCCGGGCC      | 81.37  | 77.55  | 95.96  | 67.87  |
| hsa-miR-191-5p  | MIMAT0000440 | CAACGGAAUCCCAAAGCAGCUG      | 94.13  | 84.13  | 131.97 | 96.76  |

|                  |              |                          |        |        |        |        |
|------------------|--------------|--------------------------|--------|--------|--------|--------|
| hsa-miR-192-3p   | MIMAT0004543 | CUGCCAAUCCAUAAGGUCACAG   | 131.07 | 142.51 | 103.92 | 89.56  |
| hsa-miR-192-5p   | MIMAT0000222 | CUGACCUAUGAAUUGACAGCC    | 93.88  | 102.09 | 91.85  | 86.35  |
| hsa-miR-193a-3p  | MIMAT0000459 | AACUGGGCCUACAAAGUCCCAGU  | 102.91 | 90.56  | 112.33 | 72.78  |
| hsa-miR-193a-5p  | MIMAT0004614 | UGGGUCUUUGCGGGCGAGAUGA   | 114.60 | 115.93 | 106.51 | 105.74 |
| hsa-miR-193b-3p  | MIMAT0002819 | AACUGGGCCUCAAAGUCCCVCU   | 81.18  | 77.31  | 115.74 | 85.93  |
| hsa-miR-193b-5p  | MIMAT0004767 | CGGGGUUUUGAGGGCGAGAUGA   | 166.57 | 199.38 | 141.69 | 145.03 |
| hsa-miR-194-3p   | MIMAT0004671 | CCAGUGGGGUCUGUUAUCUG     | 97.86  | 91.42  | 110.49 | 97.74  |
| hsa-miR-194-5p   | MIMAT0000460 | UGUAACAGCAACUCCAUGUGGA   | 172.95 | 174.42 | 60.48  | 78.78  |
| hsa-miR-195-3p   | MIMAT0004615 | CCAAUAUUGGCUGUGCUGCUCC   | 120.57 | 142.81 | 102.35 | 105.16 |
| hsa-miR-195-5p   | MIMAT0000461 | UAGCAGCACAGAAAUAUUGGC    | 59.59  | 92.58  | 78.07  | 75.30  |
| hsa-miR-196a-3p  | MIMAT0004562 | CGGCAACAAGAAACUGCCUGAG   | 114.75 | 108.52 | 122.90 | 120.98 |
| hsa-miR-196a-5p  | MIMAT0000226 | UAGGUAGUUCAUGUUGUUGGG    | 92.57  | 92.83  | 78.04  | 68.80  |
| hsa-miR-196b-3p  | MIMAT0009201 | UCGACAGCACGACACUGCCUUC   | 115.52 | 104.36 | 124.30 | 91.66  |
| hsa-miR-196b-5p  | MIMAT0001080 | UAGGUAGUUCCUGUUGUUGGG    | 89.02  | 74.44  | 72.24  | 54.49  |
| hsa-miR-1972     | MIMAT0009447 | UCAGGCCAGGCACAGUGGCUCA   | 134.19 | 146.58 | 109.52 | 117.99 |
| hsa-miR-1972     | MIMAT0009447 | UCAGGCCAGGCACAGUGGCUCA   | 117.74 | 87.84  | 87.12  | 102.80 |
| hsa-miR-1973     | MIMAT0009448 | ACCGUGCAAAGGUAGCAUA      | 112.50 | 89.12  | 99.28  | 89.66  |
| hsa-miR-197-3p   | MIMAT0000227 | UUCACCACCUUCCACCCAGC     | 54.84  | 55.26  | 92.84  | 85.51  |
| hsa-miR-1974     | MIMAT0009449 | UGGUUGUAGUCCGUGCGAGAAUA  | 119.67 | 101.48 | 105.57 | 112.62 |
| hsa-miR-1975     | MIMAT0009450 | CCCCACAACCGCGCUUGACUAGCU | 106.24 | 91.42  | 69.49  | 69.18  |
| hsa-miR-1976     | MIMAT0009451 | CCUCCUGCCUCCUUGCUGU      | 64.48  | 73.64  | 93.93  | 79.20  |
| hsa-miR-1977     | MIMAT0009452 | GAUUAGGGUGCUUAGCUGUUA    | 82.93  | 90.38  | 85.36  | 110.28 |
| hsa-miR-1978     | MIMAT0009453 | GGUUUGGUCCUAGCCUUCUA     | 75.49  | 77.59  | 121.89 | 104.09 |
| hsa-miR-1979     | MIMAT0009454 | CUCCACUGCUUCACUUGACUA    | 141.23 | 137.14 | 96.26  | 124.51 |
| hsa-miR-198      | MIMAT0000228 | GGUCCAGAGGGGAGAUAGGUUC   | 117.20 | 115.10 | 106.39 | 93.73  |
| hsa-miR-199a-3p  | MIMAT0000232 | ACAGUAGUCUGCACAUUGGUUA   | 123.08 | 121.94 | 99.48  | 94.52  |
| hsa-miR-199a-5p  | MIMAT0000231 | CCCAGUGUUCAGACUACCUGUUC  | 80.32  | 72.95  | 108.55 | 90.87  |
| hsa-miR-199b-5p  | MIMAT0000263 | CCCAGUGUUUAGACUAUCUGUUC  | 90.49  | 118.78 | 86.22  | 90.23  |
| hsa-miR-19a-3p   | MIMAT0000073 | UGUGCAAUUCUAUGCAAACUGA   | 107.81 | 113.91 | 117.27 | 115.72 |
| hsa-miR-19a-5p   | MIMAT0004490 | AGUUUUGCAUAGUUGCACUACA   | 50.23  | 49.19  | 124.73 | 109.32 |
| hsa-miR-19b-1-5p | MIMAT0004491 | AGUUUUGCAGGUUUGCAUCCAGC  | 36.55  | 45.32  | 90.42  | 76.21  |
| hsa-miR-19b-2-5p | MIMAT0004492 | AGUUUUGCAGGUUUGCAUUUCA   | 37.00  | 35.70  | 103.66 | 92.57  |
| hsa-miR-19b-3p   | MIMAT0000074 | UGUGCAAUCCAUGCAAACUGA    | 154.62 | 164.41 | 94.91  | 122.60 |
| hsa-miR-200a-3p  | MIMAT0000682 | UAACACUGUCUGGUAACGAUGU   | 82.95  | 80.66  | 110.49 | 92.03  |
| hsa-miR-200a-5p  | MIMAT0001620 | CAUCUUACCGGACAGUGCUGGA   | 82.47  | 98.23  | 100.73 | 91.69  |
| hsa-miR-200b-3p  | MIMAT0000318 | UAAUACUGCCUGGUAUGAUGA    | 50.55  | 52.33  | 57.75  | 66.35  |
| hsa-miR-200b-5p  | MIMAT0004571 | CAUCUUACUGGGCAGCAUUGGA   | 75.58  | 89.15  | 119.57 | 113.45 |
| hsa-miR-200c-3p  | MIMAT0000617 | UAAUACUGCCGGGUAUGAUGGA   | 82.47  | 83.97  | 61.63  | 63.38  |
| hsa-miR-200c-5p  | MIMAT0004657 | CGUCUUACCCAGCAGUGUUUGG   | 108.11 | 120.61 | 102.52 | 107.89 |
| hsa-miR-202-3p   | MIMAT0002811 | AGAGGUAUAGGGCAUGGGAA     | 91.09  | 85.98  | 135.72 | 103.64 |
| hsa-miR-202-5p   | MIMAT0002810 | UUCCUAUGCAUAUACUUCUUUG   | 97.50  | 90.18  | 106.19 | 93.41  |

|                  |              |                          |        |        |        |        |
|------------------|--------------|--------------------------|--------|--------|--------|--------|
| hsa-miR-203a     | MIMAT0000264 | GUGAAAUGUUUAGGACCACUAG   | 106.73 | 110.55 | 110.04 | 101.95 |
| hsa-miR-204-5p   | MIMAT0000265 | UCCCUUUGUCAUCCUAUGCCU    | 107.48 | 101.94 | 117.07 | 120.93 |
| hsa-miR-2052     | MIMAT0009977 | UGUUUUGAUAAACAGUAAUGU    | 40.43  | 35.71  | 100.73 | 92.51  |
| hsa-miR-2053     | MIMAT0009978 | GUGUUAUUAAACCUCUAUUUAC   | 53.83  | 45.30  | 74.24  | 92.61  |
| hsa-miR-205-3p   | MIMAT0009197 | GAUUUCAGUGGAGUGAAGUUC    | 40.99  | 53.26  | 83.90  | 86.81  |
| hsa-miR-2054     | MIMAT0009979 | CUGUAAUAUAAAUUUAAUUUAUU  | 102.96 | 104.72 | 106.68 | 98.26  |
| hsa-miR-205-5p   | MIMAT0000266 | UCCUUCAUCCACCGGAGUCUG    | 85.84  | 97.14  | 105.47 | 119.35 |
| hsa-miR-206      | MIMAT0000462 | UGGAAUGUAAGGAAGUGUGUGG   | 143.45 | 121.41 | 80.81  | 73.61  |
| hsa-miR-208a     | MIMAT0000241 | AUAAGACGAGCAAAAAGCUUGU   | 109.11 | 120.13 | 56.69  | 46.31  |
| hsa-miR-208b     | MIMAT0004960 | AUAAGACGAACAAAAGGUUUGU   | 112.15 | 124.71 | 79.73  | 80.71  |
| hsa-miR-20a-3p   | MIMAT0004493 | ACUGCAUUAUGAGCACUAAAG    | 117.03 | 108.50 | 107.64 | 84.78  |
| hsa-miR-20a-5p   | MIMAT0000075 | UAAAGUGCUUAUAGUGCAGGUAG  | 122.90 | 124.82 | 108.55 | 124.10 |
| hsa-miR-20b-3p   | MIMAT0004752 | ACUGUAGUAUGGGCACUCCAG    | 111.46 | 126.50 | 120.13 | 124.59 |
| hsa-miR-20b-5p   | MIMAT0001413 | CAAAGUGCUCUAUAGUGCAGGUAG | 124.49 | 105.05 | 114.87 | 111.62 |
| hsa-miR-210      | MIMAT0000267 | CUGUGCGUGUGACAGCGGCUGA   | 117.72 | 95.35  | 115.90 | 97.41  |
| hsa-miR-2110     | MIMAT0010133 | UUGGGGAAACGGCCGCUGAGUG   | 84.81  | 74.52  | 106.51 | 84.41  |
| hsa-miR-2113     | MIMAT0009206 | AUUUGUGCUUGGCUCUGUCAC    | 146.94 | 177.83 | 120.02 | 118.87 |
| hsa-miR-2114-3p  | MIMAT0011157 | CGAGCCUCAAGCAAGGGACUU    | 78.42  | 79.72  | 77.84  | 82.63  |
| hsa-miR-2114-5p  | MIMAT0011156 | UAGUCCCUUCCUUGAAGCGGUC   | 97.35  | 108.45 | 86.13  | 84.46  |
| hsa-miR-2115-3p  | MIMAT0011159 | CAUCAGAAUUCAUGGAGGCUAG   | 67.88  | 70.54  | 85.66  | 79.24  |
| hsa-miR-2115-5p  | MIMAT0011158 | AGCUUCCAUGACUCCUGAUGGA   | 71.96  | 66.09  | 97.82  | 82.85  |
| hsa-miR-211-5p   | MIMAT0000268 | UCCCUUUGUCAUCCUUCGCCU    | 112.02 | 92.64  | 93.49  | 101.68 |
| hsa-miR-2116-3p  | MIMAT0011161 | CCUCCAUGCCAAGAACUCCC     | 89.02  | 77.22  | 87.87  | 79.21  |
| hsa-miR-2116-5p  | MIMAT0011160 | GGUUCUUAAGCAUAGGAGGUCU   | 76.57  | 78.94  | 85.09  | 128.63 |
| hsa-miR-2117     | MIMAT0011162 | UGUUCUCUUUGCCAAGGACAG    | 85.49  | 92.42  | 117.80 | 112.80 |
| hsa-miR-212-3p   | MIMAT0000269 | UACAGUCUCCAGUCACGGCC     | 105.69 | 107.21 | 62.78  | 81.69  |
| hsa-miR-21-3p    | MIMAT0004494 | CAACACCAGUCGAUGGGCUGU    | 86.67  | 83.73  | 97.39  | 89.49  |
| hsa-miR-214-3p   | MIMAT0000271 | ACAGCAGGCACAGACAGGCAGU   | 113.07 | 138.59 | 86.42  | 93.32  |
| hsa-miR-214-5p   | MIMAT0004564 | UGCCUGUCUACACUUGCUGUGC   | 121.57 | 78.40  | 94.27  | 79.61  |
| hsa-miR-215      | MIMAT0000272 | AUGACCUAUGAAUUGACAGAC    | 90.86  | 96.00  | 107.37 | 116.87 |
| hsa-miR-21-5p    | MIMAT0000076 | UAGCUUAUCAGACUGAUGUUGA   | 110.59 | 121.46 | 112.80 | 105.38 |
| hsa-miR-216a-5p  | MIMAT0000273 | UAAUCUCAGCUGGCAACUGUGA   | 116.50 | 124.28 | 96.76  | 99.23  |
| hsa-miR-216b     | MIMAT0004959 | AAAUCUCUGCAGGCAAAUGUGA   | 169.78 | 172.43 | 116.53 | 118.25 |
| hsa-miR-217      | MIMAT0000274 | UACUGCAUCAGGAACUGAUUGGA  | 109.75 | 99.72  | 64.39  | 80.92  |
| hsa-miR-218-1-3p | MIMAT0004565 | AUGGUUCCGUCAAGCACCAUGG   | 91.81  | 110.29 | 72.19  | 62.93  |
| hsa-miR-218-2-3p | MIMAT0004566 | CAUGGUUCUGUCAAGCACCGCG   | 112.15 | 106.28 | 89.33  | 107.52 |
| hsa-miR-218-5p   | MIMAT0000275 | UUGUGCUUGAUCUAACCAUGU    | 83.07  | 86.29  | 99.94  | 99.21  |
| hsa-miR-219-1-3p | MIMAT0004567 | AGAGUUGAGUCUGGACGUCCCG   | 78.15  | 99.72  | 111.21 | 116.45 |
| hsa-miR-219-2-3p | MIMAT0004675 | AGAAUUGUGGCUGGACAUCUGU   | 49.33  | 57.21  | 138.44 | 141.06 |
| hsa-miR-219-5p   | MIMAT0000276 | UGAUUGUCCAAACGCAAUUCU    | 84.15  | 98.59  | 73.01  | 90.63  |
| hsa-miR-220a     | MIMAT0000277 | CCACACCGUAUCUGACACUUU    | 80.32  | 93.05  | 105.19 | 91.69  |

|                  |              |                          |        |        |        |        |
|------------------|--------------|--------------------------|--------|--------|--------|--------|
| hsa-miR-220b     | MIMAT0004908 | CCACCACCGUGUCUGACACUU    | 92.26  | 82.20  | 105.94 | 104.09 |
| hsa-miR-221-3p   | MIMAT0000278 | AGCUACAUUGUCUGCUGGGUUUC  | 142.31 | 139.73 | 110.78 | 120.82 |
| hsa-miR-221-5p   | MIMAT0004568 | ACCUGGCAUACAAUGUAGAUUU   | 108.04 | 92.67  | 97.28  | 104.46 |
| hsa-miR-222-3p   | MIMAT0000279 | AGCUACAUCUGGCUACUGGGU    | 97.75  | 118.23 | 79.09  | 87.81  |
| hsa-miR-222-5p   | MIMAT0004569 | CUCAGUAGCCAGUGUAGAUCU    | 45.34  | 106.70 | 89.53  | 91.03  |
| hsa-miR-223-3p   | MIMAT0000280 | UGUCAGUUUGUCAAAUACCCCA   | 113.82 | 98.12  | 82.72  | 76.97  |
| hsa-miR-223-5p   | MIMAT0004570 | CGUGUAUUUGACAAGCUGAGUU   | 83.86  | 74.16  | 83.23  | 82.97  |
| hsa-miR-22-3p    | MIMAT0000077 | AAGCUGCCAGUUGAAGAACUGU   | 56.06  | 43.12  | 78.01  | 67.08  |
| hsa-miR-224-3p   | MIMAT0009198 | AAAUGGUGCCCUAGUGACUACA   | 65.71  | 61.75  | 99.32  | 110.46 |
| hsa-miR-224-5p   | MIMAT0000281 | CAAGUCACUAGUGGUUCCGUU    | 76.04  | 63.08  | 109.42 | 104.22 |
| hsa-miR-22-5p    | MIMAT0004495 | AGUUCUUCAGUGGCAAGCUUUA   | 90.29  | 103.40 | 85.12  | 117.66 |
| hsa-miR-2276     | MIMAT0011775 | UCUGCAAGUGUCAGAGGCGAGG   | 89.12  | 89.44  | 98.34  | 105.48 |
| hsa-miR-2277-3p  | MIMAT0011777 | UGACAGCGCCCUGCCUGGCUC    | 103.84 | 120.29 | 120.76 | 115.88 |
| hsa-miR-2277-5p  | MIMAT0017352 | AGCGCGGGCUGAGCGCUGCCAGUC | 62.31  | 46.63  | 95.20  | 82.85  |
| hsa-miR-2278     | MIMAT0011778 | GAGAGCAGUGUGUGUUGCCUGG   | 101.10 | 126.54 | 96.74  | 97.36  |
| hsa-miR-2355-3p  | MIMAT0017950 | AUUGUCCUUGCUGUUUGGAGAU   | 89.56  | 97.60  | 120.80 | 114.49 |
| hsa-miR-2355-5p  | MIMAT0016895 | AUCCCAGAUACAAUGGACAA     | 144.95 | 144.71 | 103.03 | 119.72 |
| hsa-miR-23a-3p   | MIMAT0000078 | AUCACAUUGCCAGGGAUUUC     | 123.02 | 117.53 | 73.47  | 88.85  |
| hsa-miR-23a-5p   | MIMAT0004496 | GGGUUCCUGGGGAUGGGAUUU    | 120.64 | 136.43 | 88.90  | 97.80  |
| hsa-miR-23b-3p   | MIMAT0000418 | AUCACAUUGCCAGGGAUUACC    | 103.77 | 112.40 | 116.79 | 98.04  |
| hsa-miR-23b-5p   | MIMAT0004587 | UGGUUCCUGGCAUGCUGAUUU    | 106.45 | 78.96  | 77.14  | 73.53  |
| hsa-miR-23c      | MIMAT0018000 | AUCACAUUGCCAGUGAUUACCC   | 85.10  | 101.04 | 75.80  | 90.37  |
| hsa-miR-24-1-5p  | MIMAT0000079 | UGCCUACUGAGCUGAUUUCAGU   | 97.27  | 78.96  | 96.88  | 84.56  |
| hsa-miR-24-2-5p  | MIMAT0004497 | UGCCUACUGAGCUGAAACACAG   | 93.84  | 96.75  | 83.13  | 84.17  |
| hsa-miR-24-3p    | MIMAT0000080 | UGGCUCAGUUCAGCAGGAACAG   | 93.28  | 105.52 | 106.94 | 125.15 |
| hsa-miR-25-3p    | MIMAT0000081 | CAUUGCACUUGUCUCGGUCUGA   | 63.24  | 65.68  | 97.73  | 78.77  |
| hsa-miR-25-5p    | MIMAT0004498 | AGGCGGAGACUUGGGCAAUUG    | 99.22  | 93.27  | 91.90  | 110.65 |
| hsa-miR-26a-1-3p | MIMAT0004499 | CCUAUUCUUGGUUACUUGCACG   | 93.69  | 103.54 | 103.25 | 107.42 |
| hsa-miR-26a-2-3p | MIMAT0004681 | CCUAUUCUUGAUUACUUGUUUC   | 110.79 | 88.07  | 100.29 | 86.49  |
| hsa-miR-26a-5p   | MIMAT0000082 | UUCAAGUAAUCCAGGAUAGGCU   | 113.07 | 120.86 | 99.95  | 80.42  |
| hsa-miR-26b-3p   | MIMAT0004500 | CCUGUUCUCCAUAUACUUGGCUC  | 98.64  | 91.73  | 82.79  | 105.50 |
| hsa-miR-26b-5p   | MIMAT0000083 | UUCAAGUAAUUCAGGAUAGGU    | 70.46  | 91.93  | 76.84  | 105.02 |
| hsa-miR-27a-3p   | MIMAT0000084 | UUCACAGUGGCUAAGUUCGCGC   | 170.19 | 144.71 | 111.55 | 127.42 |
| hsa-miR-27a-5p   | MIMAT0004501 | AGGGCUUAGCUGCUUGUGAGCA   | 112.61 | 89.93  | 128.15 | 121.73 |
| hsa-miR-27b-3p   | MIMAT0000419 | UUCACAGUGGCUAAGUUCUGC    | 132.98 | 149.59 | 104.30 | 89.81  |
| hsa-miR-27b-5p   | MIMAT0004588 | AGAGCUUAGCUGAUUGGUGAAC   | 98.79  | 112.92 | 95.12  | 104.72 |
| hsa-miR-28-3p    | MIMAT0004502 | CACUAGAUUGUGAGCUCCUGGA   | 54.99  | 26.89  | 111.63 | 94.57  |
| hsa-miR-28-5p    | MIMAT0000085 | AAGGAGCUCACAGUCUAUUGAG   | 40.74  | 34.42  | 73.17  | 72.82  |
| hsa-miR-2861     | MIMAT0013802 | GGGGCCUGGCGGUGGGCGG      | 66.92  | 88.91  | 100.30 | 94.96  |
| hsa-miR-2909     | MIMAT0013863 | GUUAGGGCCAACAUCUCUUGG    | 78.10  | 95.31  | 103.97 | 79.61  |
| hsa-miR-296-3p   | MIMAT0004679 | GAGGGUUGGGUGGAGGCUCUCC   | 100.76 | 100.24 | 95.92  | 88.42  |

|                  |              |                          |        |        |        |        |
|------------------|--------------|--------------------------|--------|--------|--------|--------|
| hsa-miR-296-5p   | MIMAT0000690 | AGGGCCCCCCCUCAAUCCUGU    | 75.42  | 93.65  | 95.40  | 99.61  |
| hsa-miR-297      | MIMAT0004450 | AUGUAUGUGUGCAUGUGCAUG    | 60.75  | 60.73  | 84.53  | 79.10  |
| hsa-miR-298      | MIMAT0004901 | AGCAGAAGCAGGGAGGUUCUCCCA | 84.61  | 98.50  | 108.71 | 97.57  |
| hsa-miR-299-3p   | MIMAT0000687 | UAUGUGGGAUGGUAACCGCUU    | 128.60 | 104.32 | 99.51  | 110.03 |
| hsa-miR-299-5p   | MIMAT0002890 | UGUUUUACCGUCCACAUAUACA   | 96.31  | 85.59  | 94.84  | 82.38  |
| hsa-miR-29a-3p   | MIMAT0000086 | UAGCACCAUCUGAAAUCGGUUA   | 54.08  | 79.25  | 67.99  | 84.28  |
| hsa-miR-29a-5p   | MIMAT0004503 | ACUGAUUUUCUUUUGGUGUUCAG  | 112.31 | 125.79 | 110.65 | 129.72 |
| hsa-miR-29b-1-5p | MIMAT0004514 | GCUGGUUUCAUAUGGUGGUUAGA  | 93.52  | 101.83 | 125.15 | 124.59 |
| hsa-miR-29b-2-5p | MIMAT0004515 | CUGGUUUCACAUGGUGGCUUAG   | 74.65  | 61.98  | 108.65 | 97.69  |
| hsa-miR-29b-3p   | MIMAT0000100 | UAGCACCAUUUGAAAUCAGUGUU  | 118.09 | 132.64 | 101.97 | 72.19  |
| hsa-miR-29c-3p   | MIMAT0000681 | UAGCACCAUUUGAAAUCGGUUA   | 73.93  | 91.96  | 44.61  | 55.13  |
| hsa-miR-29c-5p   | MIMAT0004673 | UGACCGAUUUCUCCUGGUGUUC   | 95.15  | 90.44  | 113.92 | 113.19 |
| hsa-miR-300      | MIMAT0004903 | UAUACAAGGGCAGACUCUCUCU   | 126.73 | 137.37 | 97.91  | 116.74 |
| hsa-miR-301a-3p  | MIMAT0000688 | CAGUGCAAUAGUAUUGUCAAAAGC | 86.15  | 103.73 | 113.09 | 93.98  |
| hsa-miR-301b     | MIMAT0004958 | CAGUGCAAUGAUUUGUCAAAAGC  | 200.53 | 207.16 | 116.74 | 113.85 |
| hsa-miR-302a-3p  | MIMAT0000684 | UAAGUGCUUCCAUGUUUUGGUGA  | 123.05 | 121.62 | 146.53 | 148.85 |
| hsa-miR-302a-5p  | MIMAT0000683 | ACUUAACGUGGAUGUACUUGCU   | 120.90 | 72.56  | 107.17 | 98.25  |
| hsa-miR-302b-3p  | MIMAT0000715 | UAAGUGCUUCCAUGUUUAGUAG   | 123.02 | 126.75 | 129.86 | 126.30 |
| hsa-miR-302b-5p  | MIMAT0000714 | ACUUUAACAUGGAAGUGCUUUC   | 88.64  | 86.87  | 96.20  | 93.50  |
| hsa-miR-302c-3p  | MIMAT0000717 | UAAGUGCUUCCAUGUUUCAGUGG  | 185.42 | 233.52 | 130.29 | 123.47 |
| hsa-miR-302c-5p  | MIMAT0000716 | UUUAACAUGGGGUACCUGCUG    | 116.50 | 106.78 | 112.77 | 109.16 |
| hsa-miR-302d-3p  | MIMAT0000718 | UAAGUGCUUCCAUGUUUGAGUGU  | 89.25  | 89.85  | 134.07 | 144.28 |
| hsa-miR-302d-5p  | MIMAT0004685 | ACUUUAACAUGGAGGCACUUGC   | 92.67  | 115.93 | 71.08  | 76.21  |
| hsa-miR-302e     | MIMAT0005931 | UAAGUGCUUCCAUGCUU        | 146.11 | 139.37 | 143.10 | 133.24 |
| hsa-miR-302f     | MIMAT0005932 | UAAUUGCUUCCAUGUUU        | 118.05 | 99.53  | 82.11  | 105.64 |
| hsa-miR-3065-3p  | MIMAT0015378 | UCAGCACCAGGAUAUUGUUGGAG  | 90.69  | 78.54  | 99.51  | 91.43  |
| hsa-miR-3065-5p  | MIMAT0015066 | UCAACAAAUCACUGAUGCUGGA   | 128.50 | 114.95 | 108.00 | 122.54 |
| hsa-miR-3074-3p  | MIMAT0015027 | GAUAUCAGCUCAGUAGGCACCG   | 42.83  | 52.05  | 85.07  | 65.69  |
| hsa-miR-30a-3p   | MIMAT0000088 | CUUCAGUCGGAUGUUUGCAGC    | 129.95 | 118.27 | 69.39  | 81.23  |
| hsa-miR-30a-5p   | MIMAT0000087 | UGUAAACAUCCUCGACUGGAAG   | 94.27  | 78.71  | 104.53 | 98.77  |
| hsa-miR-30b-3p   | MIMAT0004589 | CUGGGAGGUGGAUGUUUACUUC   | 118.82 | 128.78 | 102.76 | 80.18  |
| hsa-miR-30b-5p   | MIMAT0000420 | UGUAAACAUCCUACACUCAGCU   | 118.05 | 104.07 | 107.06 | 112.21 |
| hsa-miR-30c-1-3p | MIMAT0004674 | CUGGGAGAGGGUUGUUUACUCC   | 102.06 | 104.65 | 134.62 | 121.16 |
| hsa-miR-30c-2-3p | MIMAT0004550 | CUGGGAGAAGGCUGUUUACUCU   | 121.07 | 107.99 | 110.42 | 127.52 |
| hsa-miR-30c-5p   | MIMAT0000244 | UGUAAACAUCCUACACUCUCAGC  | 62.44  | 55.93  | 81.77  | 93.80  |
| hsa-miR-30d-3p   | MIMAT0004551 | CUUCAGUCAGAUGUUUGCUGC    | 102.91 | 120.86 | 86.13  | 83.06  |
| hsa-miR-30d-5p   | MIMAT0000245 | UGUAAACAUCCCGACUGGAAG    | 69.99  | 78.45  | 119.30 | 109.34 |
| hsa-miR-30e-3p   | MIMAT0000693 | CUUCAGUCGGAUGUUUACAGC    | 104.62 | 27.13  | 78.88  | 44.10  |
| hsa-miR-30e-5p   | MIMAT0000692 | UGUAAACAUCCUUGACUGGAAG   | 101.04 | 89.22  | 119.54 | 109.60 |
| hsa-miR-3115     | MIMAT0014977 | AUAUGGGUUUACUAGUUGGU     | 81.25  | 117.34 | 68.31  | 90.93  |
| hsa-miR-3116     | MIMAT0014978 | UGCCUGGAACAUAAGUAGGGACU  | 84.89  | 82.42  | 109.60 | 137.02 |

|                  |              |                           |        |        |        |        |
|------------------|--------------|---------------------------|--------|--------|--------|--------|
| hsa-miR-3117-3p  | MIMAT0014979 | AUAGGACUCAUAUAGUGCCAG     | 85.77  | 97.58  | 84.64  | 83.11  |
| hsa-miR-3118     | MIMAT0014980 | UGUGACUGCAUUAUGAAAAUUCU   | 108.26 | 69.40  | 112.27 | 101.62 |
| hsa-miR-3119     | MIMAT0014981 | UGGCUUUUAACUUUGAUGGC      | 66.25  | 61.63  | 86.07  | 104.30 |
| hsa-miR-3120-3p  | MIMAT0014982 | CACAGCAAGUGUAGACAGGCA     | 97.91  | 109.31 | 122.03 | 114.28 |
| hsa-miR-3121-3p  | MIMAT0014983 | UAAAUAGAGUAGGCAAAGGACA    | 125.85 | 115.49 | 71.29  | 76.78  |
| hsa-miR-3122     | MIMAT0014984 | GUUGGGACAAGAGGACGGUCUU    | 76.87  | 107.66 | 97.28  | 96.58  |
| hsa-miR-3123     | MIMAT0014985 | CAGAGAAUUGUUUAAUC         | 175.93 | 142.40 | 127.65 | 101.27 |
| hsa-miR-3124-5p  | MIMAT0014986 | UUCGCGGGCGAAGGCAAAGUC     | 92.68  | 101.94 | 120.80 | 108.06 |
| hsa-miR-3125     | MIMAT0014988 | UAGAGGAAGCUGUGGAGAGA      | 100.35 | 103.93 | 97.84  | 95.78  |
| hsa-miR-3126-3p  | MIMAT0015377 | CAUCUGGCAUCCGUCACACAGA    | 89.56  | 107.36 | 100.00 | 73.74  |
| hsa-miR-3126-5p  | MIMAT0014989 | UGAGGGACAGAUGCCAGAAGCA    | 121.87 | 115.42 | 101.78 | 105.09 |
| hsa-miR-3127-5p  | MIMAT0014990 | AUCAGGGCUUGUGGAAUGGGAAG   | 109.22 | 112.44 | 124.42 | 104.76 |
| hsa-miR-3128     | MIMAT0014991 | UCUGGCAAGUAAAAACUCUCAU    | 65.20  | 78.81  | 107.64 | 121.30 |
| hsa-miR-3129-5p  | MIMAT0014992 | GCAGUAGUGUAGAGAUUGGUUU    | 117.45 | 127.33 | 82.32  | 79.95  |
| hsa-miR-3130-3p  | MIMAT0014994 | GCUGCACCGGAGACUGGGUAA     | 79.22  | 72.37  | 100.31 | 107.81 |
| hsa-miR-3130-5p  | MIMAT0014995 | UACCCAGUCUCCGGUGCAGCC     | 80.28  | 89.43  | 95.97  | 93.77  |
| hsa-miR-3131     | MIMAT0014996 | UCGAGGACUGGUGGAAGGGCCUU   | 83.26  | 124.16 | 115.03 | 102.51 |
| hsa-miR-3132     | MIMAT0014997 | UGGGUAGAGAAGGAGCUCAGAGGA  | 93.66  | 90.84  | 95.07  | 101.72 |
| hsa-miR-3133     | MIMAT0014998 | UAAAGAACUCUUAAAACCCAAU    | 60.02  | 68.42  | 75.39  | 78.60  |
| hsa-miR-3134     | MIMAT0015000 | UGAUGGAUAAAAGACUACAUAAU   | 86.91  | 99.64  | 88.12  | 110.22 |
| hsa-miR-3135a    | MIMAT0015001 | UGCCUAGGCUGAGACUGCAGUG    | 84.81  | 112.63 | 85.66  | 101.23 |
| hsa-miR-3136-5p  | MIMAT0015003 | CUGACUGAAUAGGUAGGGUCAUU   | 78.12  | 82.82  | 97.29  | 119.72 |
| hsa-miR-3137     | MIMAT0015005 | UCUGUAGCCUGGGAGCAAUGGGGU  | 95.35  | 78.96  | 140.39 | 138.44 |
| hsa-miR-3138     | MIMAT0015006 | UGUGGACAGUGAGGUAGAGGGAGU  | 70.84  | 65.69  | 106.19 | 114.43 |
| hsa-miR-3139     | MIMAT0015007 | UAGGAGCUCACAGAUGCCUGUU    | 84.11  | 60.73  | 65.33  | 61.94  |
| hsa-miR-31-3p    | MIMAT0004504 | UGCUAUGCCAACAUAUUGCCAU    | 110.60 | 106.77 | 112.33 | 139.14 |
| hsa-miR-3140-3p  | MIMAT0015008 | AGCUUUUGGGAUUCAGGUAGU     | 85.77  | 99.88  | 93.82  | 111.38 |
| hsa-miR-3141     | MIMAT0015010 | GAGGGCGGGUGGAGGAGGA       | 92.30  | 88.04  | 99.57  | 116.86 |
| hsa-miR-3142     | MIMAT0015011 | AAGGCCUUUCUGAACCUUCAGA    | 101.98 | 77.22  | 124.81 | 83.66  |
| hsa-miR-3143     | MIMAT0015012 | AUAACAUUGUAAAGCGCUUCUUUCG | 130.06 | 146.40 | 114.93 | 126.83 |
| hsa-miR-3144-3p  | MIMAT0015015 | AUAUACCUGUUCGGUCUCUUUA    | 125.38 | 120.28 | 84.98  | 118.38 |
| hsa-miR-3144-5p  | MIMAT0015014 | AGGGGACCAAAGAGAUUAUAG     | 73.21  | 65.07  | 76.00  | 76.95  |
| hsa-miR-3145-3p  | MIMAT0015016 | AGAUUUUUUGAGUGUUUGGAAUUG  | 79.06  | 105.20 | 82.01  | 95.87  |
| hsa-miR-3146     | MIMAT0015018 | CAUGCUAGGAUAGAAAGAAUGG    | 98.13  | 121.46 | 84.00  | 87.14  |
| hsa-miR-3147     | MIMAT0015019 | GGUUGGCAGUGAGGAGGGUGUGA   | 77.69  | 82.76  | 121.40 | 115.60 |
| hsa-miR-3148     | MIMAT0015021 | UGGAAAAACUGGUGUGUGCUU     | 108.63 | 126.76 | 133.10 | 128.28 |
| hsa-miR-3149     | MIMAT0015022 | UUUGUAUGGAUAUGUGUGUGUAU   | 118.82 | 107.26 | 78.23  | 88.35  |
| hsa-miR-3150a-3p | MIMAT0015023 | CUGGGGAGAUCCUCGAGGUUGG    | 59.00  | 75.14  | 111.55 | 118.10 |
| hsa-miR-3150b-3p | MIMAT0018194 | UGAGGAGAUUCGAGGUUGG       | 90.38  | 112.71 | 99.24  | 123.77 |
| hsa-miR-3151     | MIMAT0015024 | GGUGGGGCAAUGGGAUCAGGU     | 86.15  | 75.83  | 103.59 | 92.02  |
| hsa-miR-3152-3p  | MIMAT0015025 | UGUGUUAGAAUAGGGGCAAUAA    | 121.87 | 104.72 | 100.62 | 112.83 |

|                 |              |                           |        |        |        |        |
|-----------------|--------------|---------------------------|--------|--------|--------|--------|
| hsa-miR-3153    | MIMAT0015026 | GGGGAAAGCGAGUAGGGACAUUU   | 164.33 | 134.47 | 135.73 | 134.87 |
| hsa-miR-3154    | MIMAT0015028 | CAGAAGGGGAGUUGGGAGCAGA    | 87.59  | 88.70  | 83.14  | 87.96  |
| hsa-miR-3155a   | MIMAT0015029 | CCAGGCUCUGCAGUGGGAACU     | 150.31 | 129.05 | 114.93 | 120.93 |
| hsa-miR-3156-5p | MIMAT0015030 | AAAGAUCUGGAAGUGGGAGACA    | 104.81 | 109.88 | 102.28 | 89.45  |
| hsa-miR-3157-5p | MIMAT0015031 | UUCAGCCAGGCUAGUGCAGUCU    | 82.20  | 69.57  | 82.66  | 85.28  |
| hsa-miR-3158-3p | MIMAT0015032 | AAGGGCUUCCUCUCUGCAGGAC    | 106.21 | 102.17 | 98.92  | 114.52 |
| hsa-miR-3159    | MIMAT0015033 | UAGGAUUACAAGUGUCGGCCAC    | 164.05 | 180.89 | 114.39 | 130.66 |
| hsa-miR-31-5p   | MIMAT0000089 | AGGCAAGAUGCUGGCAUAGCU     | 84.58  | 86.58  | 133.23 | 137.00 |
| hsa-miR-3160-3p | MIMAT0015034 | AGAGCUGAGACUAGAAAGCCCA    | 132.73 | 116.71 | 98.24  | 93.50  |
| hsa-miR-3161    | MIMAT0015035 | CUGAUAAAGAACAGAGGCCAGAU   | 84.74  | 85.68  | 90.08  | 92.22  |
| hsa-miR-3162-5p | MIMAT0015036 | UUAGGGAGUAGAAGGGUGGGGAG   | 86.91  | 106.34 | 116.01 | 87.77  |
| hsa-miR-3163    | MIMAT0015037 | UAUAAAUGAGGGCAGUAAGAC     | 97.53  | 124.25 | 125.86 | 124.01 |
| hsa-miR-3164    | MIMAT0015038 | UGUGACUUUAAGGGAAAUGGCG    | 101.11 | 117.37 | 108.67 | 104.62 |
| hsa-miR-3165    | MIMAT0015039 | AGGUGGAUGCAAUGUGACCUCA    | 42.63  | 46.61  | 61.34  | 75.15  |
| hsa-miR-3166    | MIMAT0015040 | CGCAGACAAUGCCUACUGGCCUA   | 75.38  | 82.09  | 93.08  | 76.78  |
| hsa-miR-3167    | MIMAT0015042 | AGGAUUUCAGAAUACUGGUGU     | 91.78  | 108.28 | 84.29  | 105.46 |
| hsa-miR-3168    | MIMAT0015043 | GAGUUCUACAGUCAGAC         | 111.67 | 84.98  | 100.56 | 90.23  |
| hsa-miR-3169    | MIMAT0015044 | UAGGACUGUGCUUGGCACAUAG    | 56.96  | 52.87  | 119.13 | 116.48 |
| hsa-miR-3170    | MIMAT0015045 | CUGGGGUUCUGAGACAGACAGU    | 133.06 | 143.82 | 139.03 | 151.18 |
| hsa-miR-3171    | MIMAT0015046 | AGAUGUAUGGAAUCUGUAUUAUUC  | 85.29  | 92.31  | 93.26  | 101.67 |
| hsa-miR-3173-3p | MIMAT0015048 | AAAGGAGGAAAUAGGCAGGCCA    | 73.28  | 81.16  | 101.82 | 102.79 |
| hsa-miR-3174    | MIMAT0015051 | UAGUGAGUUAGAGAUGCAGAGCC   | 60.53  | 76.59  | 92.20  | 98.05  |
| hsa-miR-3175    | MIMAT0015052 | CGGGGAGAGAACGCAGUGACGU    | 81.51  | 95.31  | 112.50 | 94.60  |
| hsa-miR-3176    | MIMAT0015053 | ACUGGCCUGGGACUACCGG       | 125.63 | 97.58  | 126.67 | 111.61 |
| hsa-miR-3177-3p | MIMAT0015054 | UGCACGGCACUGGGGACACGU     | 28.82  | 37.96  | 92.00  | 82.32  |
| hsa-miR-3178    | MIMAT0015055 | GGGGCGCGGCCGGAUCG         | 95.97  | 97.61  | 119.44 | 119.88 |
| hsa-miR-3179    | MIMAT0015056 | AGAAGGGGUGAAAUUUAAACGU    | 81.94  | 88.40  | 83.28  | 102.68 |
| hsa-miR-3180    | MIMAT0018178 | UGGGGCGGAGCUUCCGGAG       | 73.63  | 113.65 | 105.04 | 116.69 |
| hsa-miR-3180-3p | MIMAT0015058 | UGGGGCGGAGCUUCCGGAGGCC    | 91.12  | 72.66  | 121.33 | 137.02 |
| hsa-miR-3180-5p | MIMAT0015057 | CUUCCAGACGCUCCGCCCCACGUCG | 88.36  | 103.54 | 101.78 | 105.09 |
| hsa-miR-3181    | MIMAT0015061 | AUCGGGCCUCGCGCCGG         | 54.91  | 60.53  | 118.18 | 78.40  |
| hsa-miR-3182    | MIMAT0015062 | GCUUCUGUAGUGUAGUC         | 134.06 | 152.53 | 117.47 | 102.36 |
| hsa-miR-3183    | MIMAT0015063 | GCCUCUCUCGGAGUCGCUCGGA    | 113.73 | 109.08 | 122.79 | 117.15 |
| hsa-miR-3184-5p | MIMAT0015064 | UGAGGGGCCUCAGACCGAGCUUUU  | 65.14  | 53.57  | 103.50 | 95.82  |
| hsa-miR-3185    | MIMAT0015065 | AGAAGAAGGCGGUCGGUCUGCGG   | 138.13 | 153.06 | 104.45 | 120.13 |
| hsa-miR-3186-3p | MIMAT0015068 | UCACGCGGAGAGAUGGCUUUG     | 59.19  | 41.21  | 85.60  | 91.97  |
| hsa-miR-3186-5p | MIMAT0015067 | CAGGCGUCUGUCUACGUGGCUU    | 72.11  | 99.17  | 85.09  | 77.57  |
| hsa-miR-3187-3p | MIMAT0015069 | UUGCCAUGGGGUCGCGCGG       | 93.46  | 124.71 | 108.53 | 131.65 |
| hsa-miR-3188    | MIMAT0015070 | AGAGGCUUUGUGCGGAUACGGGG   | 131.77 | 107.26 | 106.19 | 90.30  |
| hsa-miR-3189-3p | MIMAT0015071 | CCCUUGGGUCUGAUGGGGUAG     | 88.45  | 64.50  | 95.55  | 84.50  |
| hsa-miR-3190    | MIMAT0015073 | UGUGGAAGGUAGACGGCCAGAGA   | 123.81 | 131.49 | 125.29 | 108.38 |

|                 |              |                          |        |        |        |        |
|-----------------|--------------|--------------------------|--------|--------|--------|--------|
| hsa-miR-3191-3p | MIMAT0015075 | UGGGGACGUAGCUGGCCAGACAG  | 95.16  | 88.36  | 112.97 | 107.16 |
| hsa-miR-3192    | MIMAT0015076 | UCUGGGAGGUUGUAGCAGUGGAA  | 92.30  | 71.48  | 70.70  | 61.29  |
| hsa-miR-3193    | MIMAT0015077 | UCCUGCGUAGGAUCUGAGGAGU   | 74.69  | 98.79  | 87.39  | 113.64 |
| hsa-miR-3194-5p | MIMAT0015078 | GGCCAGCCACCAGGAGGGCUG    | 127.73 | 108.45 | 81.87  | 64.62  |
| hsa-miR-3195    | MIMAT0015079 | CGCGCCGGGCCCGGGUU        | 111.97 | 108.00 | 95.89  | 82.13  |
| hsa-miR-3196    | MIMAT0015080 | CGGGGCGGCAGGGGCCUC       | 95.16  | 88.36  | 98.29  | 114.86 |
| hsa-miR-3197    | MIMAT0015082 | GGAGGCGCAGGCUCGAAAGGCG   | 94.56  | 108.13 | 138.78 | 127.39 |
| hsa-miR-3198    | MIMAT0015083 | GUGGAGUCCUGGGGAAUGGAGA   | 151.77 | 180.89 | 83.60  | 71.91  |
| hsa-miR-3199    | MIMAT0015084 | AGGGACUGCCUUAGGAGAAAGUU  | 121.87 | 116.46 | 94.50  | 89.87  |
| hsa-miR-3200-3p | MIMAT0015085 | CACCUUGCGCUACUCAGGUCUG   | 89.95  | 115.43 | 82.88  | 93.80  |
| hsa-miR-3200-5p | MIMAT0017392 | AAUCUGAGAAGGCGCACAAAGGU  | 83.03  | 74.48  | 108.48 | 102.55 |
| hsa-miR-3201    | MIMAT0015086 | GGGAUAUGAAGAAAAAU        | 117.60 | 123.63 | 113.33 | 111.27 |
| hsa-miR-3202    | MIMAT0015089 | UGGAAGGGAGAAGAGCUUUAU    | 125.70 | 99.88  | 98.58  | 97.85  |
| hsa-miR-320a    | MIMAT0000510 | AAAAGCUGGGUUGAGAGGGCGA   | 70.62  | 68.41  | 98.12  | 85.54  |
| hsa-miR-320b    | MIMAT0005792 | AAAAGCUGGGUUGAGAGGGCAA   | 120.48 | 111.87 | 127.59 | 135.09 |
| hsa-miR-320c    | MIMAT0005793 | AAAAGCUGGGUUGAGAGGGU     | 86.83  | 98.74  | 97.88  | 123.20 |
| hsa-miR-320d    | MIMAT0006764 | AAAAGCUGGGUUGAGAGGA      | 112.50 | 122.45 | 92.20  | 78.84  |
| hsa-miR-320e    | MIMAT0015072 | AAAGCUGGGUUGAGAAGG       | 118.23 | 114.14 | 105.12 | 115.34 |
| hsa-miR-323a-3p | MIMAT0000755 | CACAUACACGGUCGACCUCU     | 73.44  | 86.87  | 69.63  | 81.51  |
| hsa-miR-323a-5p | MIMAT0004696 | AGGUGGUCCGUGGCGCGUUCGC   | 85.38  | 91.52  | 92.99  | 90.38  |
| hsa-miR-323b-3p | MIMAT0015050 | CCCAUACACGGUCGACCUCUU    | 69.58  | 52.18  | 79.91  | 74.92  |
| hsa-miR-323b-5p | MIMAT0001630 | AGGUUGUCCGUGGUGAGUUCGCA  | 107.40 | 90.18  | 111.59 | 97.69  |
| hsa-miR-32-3p   | MIMAT0004505 | CAAUUAGUGUGUGUGAUUUU     | 112.02 | 128.25 | 112.75 | 123.17 |
| hsa-miR-324-3p  | MIMAT0000762 | ACUGCCCCAGGUGCUGCUGG     | 96.55  | 117.16 | 101.63 | 109.47 |
| hsa-miR-324-5p  | MIMAT0000761 | CGCAUCCCCUAGGGCAUUGGUGU  | 74.34  | 82.25  | 103.99 | 83.06  |
| hsa-miR-325     | MIMAT0000771 | CCUAGUAGGUGUCCAGUAAGUGU  | 94.39  | 84.31  | 109.45 | 101.47 |
| hsa-miR-32-5p   | MIMAT0000090 | UAUUGCACAUUACUAAGUUGCA   | 86.67  | 74.03  | 99.25  | 88.63  |
| hsa-miR-326     | MIMAT0000756 | CCUCUGGGCCCUUCCUCCAG     | 76.41  | 97.04  | 78.06  | 61.68  |
| hsa-miR-328     | MIMAT0000752 | CUGGCCUCUCUGCCCUUCCGU    | 183.06 | 180.43 | 84.95  | 103.13 |
| hsa-miR-329     | MIMAT0001629 | AACACACCUGGUUAACCUCUUU   | 76.53  | 71.45  | 82.37  | 98.82  |
| hsa-miR-330-3p  | MIMAT0000751 | GCAAAGCACACGGCCUGCAGAGA  | 140.42 | 154.18 | 105.68 | 113.43 |
| hsa-miR-330-5p  | MIMAT0004693 | UCUCUGGGCCUGUGUCUAGGC    | 102.21 | 102.13 | 141.60 | 121.45 |
| hsa-miR-331-3p  | MIMAT0000760 | GCCCCUGGGCCUAUCCUAGAA    | 112.24 | 130.82 | 125.31 | 99.03  |
| hsa-miR-331-5p  | MIMAT0004700 | CUAGGUAUGGUCCCAGGGAUCC   | 107.42 | 110.88 | 94.68  | 78.28  |
| hsa-miR-335-3p  | MIMAT0004703 | UUUUUCAUUAUUGCUCUCCUGACC | 81.56  | 85.62  | 87.24  | 78.35  |
| hsa-miR-335-5p  | MIMAT0000765 | UCAAGAGCAAUAACGAAAAUGU   | 84.55  | 86.47  | 116.49 | 114.82 |
| hsa-miR-337-3p  | MIMAT0000754 | CUCCUAUAUGAUGCCUUCUUC    | 91.12  | 101.94 | 113.33 | 110.74 |
| hsa-miR-337-5p  | MIMAT0004695 | GAACGGCUUCAUACAGGAGUU    | 127.73 | 109.53 | 102.13 | 111.81 |
| hsa-miR-338-3p  | MIMAT0000763 | UCCAGCAUCAGUGAUUUUGUUG   | 110.65 | 124.17 | 77.06  | 105.17 |
| hsa-miR-338-5p  | MIMAT0004701 | AACAAUAUCCUGGUGCUGAGUG   | 98.24  | 83.48  | 87.19  | 82.18  |
| hsa-miR-339-3p  | MIMAT0004702 | UGAGCGCCUCGACGACAGAGCCG  | 121.51 | 95.78  | 73.14  | 78.33  |

|                  |              |                          |        |        |        |        |
|------------------|--------------|--------------------------|--------|--------|--------|--------|
| hsa-miR-339-5p   | MIMAT0000764 | UCCCGUCCUCCAGGAGCUCACG   | 122.90 | 128.71 | 79.13  | 85.54  |
| hsa-miR-33a-3p   | MIMAT0004506 | CAAUGUUUCCACAGUGCAUCAC   | 72.94  | 78.40  | 80.46  | 70.81  |
| hsa-miR-33a-5p   | MIMAT0000091 | GUGCAUUGUAGUUGCAUUGCA    | 105.87 | 110.97 | 65.48  | 65.39  |
| hsa-miR-33b-3p   | MIMAT0004811 | CAGUGCCUCGGCAGUGCAGCCC   | 98.24  | 111.45 | 100.67 | 100.76 |
| hsa-miR-33b-5p   | MIMAT0003301 | GUGCAUUGCUGUUGCAUUGC     | 75.23  | 113.91 | 76.14  | 69.34  |
| hsa-miR-340-3p   | MIMAT0000750 | UCCGUCUCAGUUACUUUAUAGC   | 111.36 | 121.39 | 103.66 | 113.70 |
| hsa-miR-340-5p   | MIMAT0004692 | UUAUAAAGCAAUGAGACUGAUU   | 73.74  | 88.44  | 141.77 | 110.64 |
| hsa-miR-342-3p   | MIMAT0000753 | UCUCACACAGAAAUCGCACCCGU  | 118.09 | 100.43 | 96.21  | 91.04  |
| hsa-miR-342-5p   | MIMAT0004694 | AGGGGUGCUAUCUGUGAUUGA    | 98.70  | 79.78  | 106.67 | 90.93  |
| hsa-miR-345-5p   | MIMAT0000772 | GCUGACUCCUAGUCCAGGGCUC   | 108.92 | 87.21  | 81.18  | 82.90  |
| hsa-miR-346      | MIMAT0000773 | UGUCUGCCCUGAUGCCUGCCUCU  | 115.52 | 110.67 | 102.48 | 116.48 |
| hsa-miR-34a-3p   | MIMAT0004557 | CAAUCAGCAAGUAUACUGCCCU   | 70.46  | 98.74  | 78.84  | 66.74  |
| hsa-miR-34a-5p   | MIMAT0000255 | UGGCAGUGUCUUAGCUGGUUGU   | 37.93  | 39.04  | 68.79  | 75.93  |
| hsa-miR-34b-3p   | MIMAT0004676 | CAAUCACUAACUCCACUGCCA    | 67.80  | 70.55  | 98.20  | 104.07 |
| hsa-miR-34b-5p   | MIMAT0000685 | UAGGCAGUGUCAUUAGCUGAUUG  | 84.31  | 73.10  | 132.29 | 128.37 |
| hsa-miR-34c-3p   | MIMAT0004677 | AAUCACUAACCACACGGCCAGG   | 147.12 | 161.18 | 142.49 | 124.44 |
| hsa-miR-34c-5p   | MIMAT0000686 | AGGCAGUGUAGUUAGCUGAUUGC  | 33.46  | 39.89  | 80.23  | 91.66  |
| hsa-miR-3605-3p  | MIMAT0017982 | CCUCCGUGUUACCUGUCCUCUAG  | 97.59  | 97.07  | 105.37 | 102.44 |
| hsa-miR-3605-5p  | MIMAT0017981 | UGAGGAUGGAUAGCAAGGAAGCC  | 102.06 | 100.90 | 118.63 | 102.92 |
| hsa-miR-3606-5p  | MIMAT0017983 | UUAGUGAAGGCUAUUUUAAAU    | 100.09 | 88.94  | 83.16  | 91.98  |
| hsa-miR-3607-3p  | MIMAT0017985 | ACUGUAAACGCUUUCUGAUG     | 67.69  | 101.66 | 95.93  | 127.87 |
| hsa-miR-3607-5p  | MIMAT0017984 | GCAUGUGAUGAAGCAAUCAGU    | 113.58 | 135.74 | 111.96 | 114.43 |
| hsa-miR-3609     | MIMAT0017986 | CAAAGUGAUGAGUAAUACUGGCUG | 106.30 | 109.48 | 109.49 | 105.28 |
| hsa-miR-3610     | MIMAT0017987 | GAAUCGGAAAGGAGGCGCCG     | 125.39 | 151.82 | 88.27  | 77.49  |
| hsa-miR-3611     | MIMAT0017988 | UUGUGAAGAAAGAAAUUCUUA    | 96.95  | 90.18  | 86.00  | 83.11  |
| hsa-miR-3612     | MIMAT0017989 | AGGAGGCAUCUUGAGAAAUGGA   | 48.32  | 67.43  | 97.29  | 91.03  |
| hsa-miR-3613-3p  | MIMAT0017991 | ACAAAAAAAAGCCCAACCCUUC   | 101.42 | 92.48  | 106.73 | 98.81  |
| hsa-miR-3613-5p  | MIMAT0017990 | UGUUGUACUUUUUUUUUGUUC    | 67.79  | 73.85  | 108.15 | 112.09 |
| hsa-miR-361-3p   | MIMAT0004682 | UCCCCAGGUGUGAUUCUGAUUU   | 131.44 | 109.64 | 99.29  | 93.35  |
| hsa-miR-3614-3p  | MIMAT0017993 | UAGCCUUCAGAUCUUGGUGUUU   | 127.90 | 118.96 | 113.37 | 114.52 |
| hsa-miR-3614-5p  | MIMAT0017992 | CCACUUGGAUCUGAAGGCUGCCC  | 120.40 | 128.01 | 87.39  | 110.00 |
| hsa-miR-3615     | MIMAT0017994 | UCUCUCGGCUCUCCGCGGCUC    | 166.78 | 162.80 | 134.76 | 151.73 |
| hsa-miR-361-5p   | MIMAT0000703 | UUAUCAGAAUCUCCAGGGGUAC   | 91.08  | 102.49 | 97.84  | 97.84  |
| hsa-miR-3616-3p  | MIMAT0017996 | CGAGGGCAUUUCAUGAUGCAGGC  | 101.30 | 94.64  | 112.08 | 104.31 |
| hsa-miR-3616-5p  | MIMAT0017995 | AUGAAGUGCACUCAUGUAUGU    | 132.55 | 145.68 | 88.55  | 80.55  |
| hsa-miR-3617-5p  | MIMAT0017997 | AAAGACAUAGUUGCAAGAUGGG   | 125.85 | 144.71 | 103.50 | 109.19 |
| hsa-miR-3618     | MIMAT0017998 | UGUCUACAUAUAAUGAAAAGAGC  | 119.16 | 137.73 | 110.67 | 127.90 |
| hsa-miR-3619-5p  | MIMAT0017999 | UCAGCAGGCAGGCUGGUGCAGC   | 98.13  | 121.46 | 67.47  | 76.42  |
| hsa-miR-3620-3p  | MIMAT0018001 | UCACCCUGCAUCCCGCACCCAG   | 113.57 | 126.62 | 100.18 | 112.83 |
| hsa-miR-3621     | MIMAT0018002 | CGCGGGUCGGGGUCUGCAGG     | 110.44 | 87.21  | 96.87  | 92.24  |
| hsa-miR-3622a-3p | MIMAT0018004 | UCACCUGACCUCCAUGCCUGU    | 103.98 | 89.93  | 100.96 | 111.13 |

|                  |              |                          |        |        |        |        |
|------------------|--------------|--------------------------|--------|--------|--------|--------|
| hsa-miR-3622a-5p | MIMAT0018003 | CAGGCACGGGAGCUCAGGUGAG   | 102.83 | 99.83  | 106.68 | 100.42 |
| hsa-miR-3622b-3p | MIMAT0018006 | UCACCUGAGCUCCCGUGCCUG    | 104.40 | 88.09  | 86.08  | 93.62  |
| hsa-miR-3622b-5p | MIMAT0018005 | AGGCAUGGGAGGUCAGGUGA     | 37.17  | 55.14  | 69.57  | 70.45  |
| hsa-miR-362-3p   | MIMAT0004683 | AACACACCUAUUCAAGGAUUA    | 98.59  | 86.38  | 84.42  | 90.57  |
| hsa-miR-362-5p   | MIMAT0000705 | AAUCCUUGGAACCUAGGUGUGAGU | 70.92  | 76.43  | 103.66 | 79.10  |
| hsa-miR-363-3p   | MIMAT0000707 | AAUUGCACGGUAUCCAUCUGUA   | 129.28 | 84.59  | 104.27 | 130.04 |
| hsa-miR-363-5p   | MIMAT0003385 | CGGGUGGAUCACGAUGCAAUUU   | 36.49  | 37.31  | 100.66 | 89.33  |
| hsa-miR-3646     | MIMAT0018065 | AAAAUGAAAUGAGCCCAGCCCA   | 116.58 | 67.71  | 90.67  | 87.29  |
| hsa-miR-3647-3p  | MIMAT0018067 | AGAAAUUUUUGUGUGUCUGAUC   | 57.70  | 50.29  | 72.07  | 80.51  |
| hsa-miR-3647-5p  | MIMAT0018066 | CUGAAGUGAUGAUUCACAUUCAU  | 137.02 | 129.37 | 120.90 | 117.62 |
| hsa-miR-3648     | MIMAT0018068 | AGCCGCGGGGAUCGCCGAGGG    | 131.01 | 93.15  | 102.76 | 102.36 |
| hsa-miR-3649     | MIMAT0018069 | AGGGACCUGAGUGUCUAAG      | 135.51 | 134.47 | 104.27 | 105.38 |
| hsa-miR-365*     | MIMAT0009199 | AGGGACUUUCAGGGGCAGCUGU   | 83.51  | 75.96  | 108.04 | 95.95  |
| hsa-miR-3650     | MIMAT0018070 | AGGUGUGUCUGUAGAGUCC      | 61.93  | 54.72  | 89.12  | 79.96  |
| hsa-miR-3651     | MIMAT0018071 | CAUAGCCCGGUCGUGUACAUGA   | 71.53  | 68.86  | 124.78 | 117.51 |
| hsa-miR-3652     | MIMAT0018072 | CGGCUGGAGGUGUGAGGA       | 88.64  | 81.25  | 135.29 | 139.64 |
| hsa-miR-3653     | MIMAT0018073 | CUAAGAAGUUGACUGAAG       | 147.98 | 155.08 | 95.20  | 87.14  |
| hsa-miR-3654     | MIMAT0018074 | GACUGGACAAGCUGAGGAA      | 112.21 | 137.75 | 76.50  | 101.08 |
| hsa-miR-3655     | MIMAT0018075 | GCUUGUCGUCGCGGUGUUGCU    | 117.39 | 96.81  | 121.69 | 93.26  |
| hsa-miR-3656     | MIMAT0018076 | GGCGGGUGCGGGGGUGG        | 127.86 | 102.34 | 120.02 | 113.59 |
| hsa-miR-3657     | MIMAT0018077 | UGUGUCCAUUAUUGGUGAUU     | 51.79  | 47.88  | 98.84  | 92.24  |
| hsa-miR-3658     | MIMAT0018078 | UUUAAGAAAACACCAUGGAGAU   | 74.77  | 87.84  | 86.67  | 95.19  |
| hsa-miR-3659     | MIMAT0018080 | UGAGUGUUGUCUACGAGGGCA    | 110.05 | 114.67 | 107.07 | 92.05  |
| hsa-miR-365a-3p  | MIMAT0000710 | UAAUGCCCUAAAAUCCUUUAU    | 90.34  | 73.74  | 95.73  | 109.13 |
| hsa-miR-3660     | MIMAT0018081 | ACUGACAGGAGAGCAUUUUGA    | 86.57  | 92.08  | 69.76  | 81.69  |
| hsa-miR-3661     | MIMAT0018082 | UGACCUGGGACUCGGACAGCUG   | 112.92 | 116.71 | 100.96 | 82.14  |
| hsa-miR-3662     | MIMAT0018083 | GAAAUGAUGAGUAGUGACUGAUG  | 87.05  | 93.24  | 92.80  | 96.16  |
| hsa-miR-3663-3p  | MIMAT0018085 | UGAGCACACACAGGCCGGGCGC   | 103.33 | 84.49  | 31.32  | 23.35  |
| hsa-miR-3663-5p  | MIMAT0018084 | GCUGGUCUGCGUGGUGCUCGG    | 94.66  | 112.02 | 92.89  | 89.09  |
| hsa-miR-3664-5p  | MIMAT0018086 | AACUCUGUCUUCACUCAUGAGU   | 108.69 | 82.95  | 108.92 | 96.92  |
| hsa-miR-3665     | MIMAT0018087 | AGCAGGUGCGGGGCGGCG       | 3.89   | 19.52  | 98.40  | 85.53  |
| hsa-miR-3666     | MIMAT0018088 | CAGUGCAAGUGUAGAUGCCGA    | 120.99 | 107.12 | 91.64  | 83.06  |
| hsa-miR-3667-3p  | MIMAT0018090 | ACCUUCCUCUCCAUGGGUCUUU   | 67.88  | 62.37  | 92.46  | 71.03  |
| hsa-miR-3667-5p  | MIMAT0018089 | AAAGACCCAUGAGGAGAAGGU    | 113.73 | 119.79 | 80.66  | 94.20  |
| hsa-miR-3668     | MIMAT0018091 | AAUGUAGAGAUUGAUCAAAU     | 99.82  | 107.27 | 103.68 | 103.16 |
| hsa-miR-3669     | MIMAT0018092 | ACGGAAUAUGUAUACGAAUAUA   | 100.75 | 123.17 | 103.27 | 99.75  |
| hsa-miR-3670     | MIMAT0018093 | AGAGCUCACAGCUGCCUUCUCUA  | 107.40 | 105.03 | 89.03  | 93.02  |
| hsa-miR-3671     | MIMAT0018094 | AUCAAAUAAGGACUAGUCUGCA   | 126.56 | 108.22 | 116.88 | 108.79 |
| hsa-miR-3672     | MIMAT0018095 | AUGAGACUCAUGUAAAACAUCUU  | 109.40 | 132.11 | 114.06 | 124.81 |
| hsa-miR-3673     | MIMAT0018096 | AUGGAAUGUAUAUACGGAAUA    | 112.48 | 112.18 | 81.18  | 86.62  |
| hsa-miR-367-3p   | MIMAT0000719 | AAUUGCACUUUAGCAAUGGUGA   | 51.75  | 52.20  | 95.89  | 102.36 |

|                  |              |                          |        |        |        |        |
|------------------|--------------|--------------------------|--------|--------|--------|--------|
| hsa-miR-3674     | MIMAT0018097 | AUUGUAGAACCUAAGAUUGGCC   | 57.75  | 59.08  | 88.17  | 80.59  |
| hsa-miR-3675-3p  | MIMAT0018099 | CAUCUCUAAGGAACUCCCCAA    | 95.99  | 94.26  | 117.61 | 112.83 |
| hsa-miR-3675-5p  | MIMAT0018098 | UAUGGGGCUUCUGUAGAGAUUUC  | 124.45 | 136.85 | 105.37 | 109.44 |
| hsa-miR-367-5p   | MIMAT0004686 | ACUGUUGC UAAUAUGCAACUCU  | 96.08  | 93.38  | 85.57  | 63.36  |
| hsa-miR-3676-3p  | MIMAT0018100 | CCGUGUUUCCCCACGCUUU      | 140.19 | 93.26  | 111.20 | 103.77 |
| hsa-miR-3677-3p  | MIMAT0018101 | CUCGUGGGCUCUGGCCACGGCC   | 102.38 | 102.94 | 98.92  | 100.02 |
| hsa-miR-3678-3p  | MIMAT0018103 | CUGCAGAGUUUGUACGGACCGG   | 71.47  | 87.49  | 87.95  | 81.58  |
| hsa-miR-3678-5p  | MIMAT0018102 | UCCGUACAAACUCUGCUGUG     | 106.21 | 104.72 | 95.52  | 84.56  |
| hsa-miR-3679-3p  | MIMAT0018105 | CUUCCCCCAGUAAUCUUCAUC    | 120.91 | 118.50 | 95.52  | 100.75 |
| hsa-miR-3679-5p  | MIMAT0018104 | UGAGGAUAUGGCAGGGAAGGGGA  | 69.92  | 77.92  | 94.50  | 71.10  |
| hsa-miR-3680-3p  | MIMAT0018107 | UUUUGCAUGACCCUGGGAGUAGG  | 152.65 | 96.52  | 93.60  | 81.78  |
| hsa-miR-3680-5p  | MIMAT0018106 | GACUCACUCACAGGAUUGUGCA   | 94.07  | 104.21 | 113.19 | 100.02 |
| hsa-miR-3681-3p  | MIMAT0018109 | ACACAGUGCUUCAUCCACUACU   | 108.77 | 109.48 | 94.84  | 75.69  |
| hsa-miR-3681-5p  | MIMAT0018108 | UAGUGGAUGAUGCACUCUGUGC   | 68.54  | 68.32  | 114.40 | 106.98 |
| hsa-miR-3682-3p  | MIMAT0018110 | UGAUGAUACAGGUGGAGGUAG    | 93.63  | 121.93 | 96.72  | 118.81 |
| hsa-miR-3683     | MIMAT0018111 | UGCGACAUUGGAAGUAGUAUCA   | 88.96  | 94.26  | 93.14  | 87.46  |
| hsa-miR-3684     | MIMAT0018112 | UUAGACCUAGUACACGUCCUU    | 118.38 | 88.93  | 82.93  | 79.64  |
| hsa-miR-3685     | MIMAT0018113 | UUUCCUACCCUACCUGAAGACU   | 102.06 | 101.66 | 90.42  | 114.52 |
| hsa-miR-3686     | MIMAT0018114 | AUCUGUAAGAGAAAGUAAAUGA   | 80.02  | 85.08  | 80.56  | 93.74  |
| hsa-miR-3687     | MIMAT0018115 | CCCGGACAGGCGUUCGUGCGACGU | 112.73 | 119.13 | 118.45 | 110.54 |
| hsa-miR-3688-3p  | MIMAT0018116 | UAUGGAAAGACUUUGCCACUCU   | 138.10 | 121.79 | 103.49 | 118.05 |
| hsa-miR-3689a-3p | MIMAT0018118 | CUGGGAGGUGUGAUUUCGUGGU   | 130.83 | 110.67 | 119.47 | 116.76 |
| hsa-miR-3689a-5p | MIMAT0018117 | UGUGAUAUCAUGGUUCCUGGGA   | 93.69  | 125.81 | 100.31 | 119.88 |
| hsa-miR-3689b-3p | MIMAT0018181 | CUGGGAGGUGUGAUUUGUGGU    | 89.22  | 94.14  | 128.80 | 113.59 |
| hsa-miR-3689b-5p | MIMAT0018180 | UGUGAUAUCAUGGUUCCUGGGA   | 101.30 | 100.88 | 97.34  | 114.05 |
| hsa-miR-3690     | MIMAT0018119 | ACCUGGACCCAGCGUAGACAAAG  | 91.75  | 83.49  | 104.92 | 116.48 |
| hsa-miR-3691-5p  | MIMAT0018120 | AGUGGAUGAUGGAGACUCGGUAC  | 102.30 | 91.52  | 113.82 | 106.07 |
| hsa-miR-3692-3p  | MIMAT0018122 | GUUCCACACUGACACUGCAGAAGU | 93.57  | 131.08 | 112.22 | 114.07 |
| hsa-miR-3692-5p  | MIMAT0018121 | CCUGCUGGUCAGGAGUGGAUACUG | 137.84 | 140.69 | 106.39 | 111.86 |
| hsa-miR-369-3p   | MIMAT0000721 | AAUAAUACAUGGUUGAUCUUU    | 116.11 | 113.15 | 138.23 | 155.59 |
| hsa-miR-369-5p   | MIMAT0001621 | AGAUCGACCGUGUUUAUUCGC    | 105.87 | 108.74 | 116.98 | 115.99 |
| hsa-miR-370      | MIMAT0000722 | GCCUGCUGGGGUGGAACCUGGU   | 92.72  | 101.48 | 101.47 | 97.85  |
| hsa-miR-3713     | MIMAT0018164 | GGUAUCCGUUUGGGGAUGGU     | 81.53  | 70.60  | 106.15 | 102.48 |
| hsa-miR-3714     | MIMAT0018165 | GAAGGCAGCAGUGCUCUCCUGU   | 68.39  | 74.18  | 101.17 | 87.86  |
| hsa-miR-371a-3p  | MIMAT0000723 | AAGUGCCGCAUCUUUUGAGUGU   | 135.14 | 135.97 | 129.29 | 128.84 |
| hsa-miR-371a-5p  | MIMAT0004687 | ACUCAACUGUGGGGCACU       | 139.61 | 137.14 | 101.10 | 110.15 |
| hsa-miR-372      | MIMAT0000724 | AAAGUGCUGCGACAUUUGAGCGU  | 86.91  | 115.93 | 121.86 | 128.30 |
| hsa-miR-373-3p   | MIMAT0000726 | GAAGUGCUCGAUUUUGGGGUGU   | 139.07 | 135.84 | 138.34 | 158.15 |
| hsa-miR-373-5p   | MIMAT0000725 | ACUCAAAAUGGGGGCGCUUCC    | 151.73 | 161.56 | 111.33 | 92.81  |
| hsa-miR-374a-3p  | MIMAT0004688 | CUUAUCAGAUUGUAUUGUAAU    | 80.02  | 97.14  | 82.37  | 97.39  |
| hsa-miR-374a-5p  | MIMAT0000727 | UUAAUACAACCUGAUAAAGUG    | 87.82  | 96.20  | 114.49 | 84.95  |

|                 |              |                            |        |        |        |        |
|-----------------|--------------|----------------------------|--------|--------|--------|--------|
| hsa-miR-374b-3p | MIMAT0004956 | CUUAGCAGGUUGUAUUAUCAUU     | 49.17  | 42.60  | 114.46 | 90.70  |
| hsa-miR-374b-5p | MIMAT0004955 | AUAUAAUACAACCUGCUAAGUG     | 64.48  | 70.12  | 116.79 | 117.31 |
| hsa-miR-374c-5p | MIMAT0018443 | AUAAUACAACCUGCUAAGUGCU     | 60.53  | 57.53  | 96.54  | 93.74  |
| hsa-miR-375     | MIMAT0000728 | UUUGUUCGUUCGGCUCGCGUGA     | 115.48 | 101.41 | 97.56  | 93.74  |
| hsa-miR-376a-3p | MIMAT0000729 | AUCAUAGAGGAAAUCCACGU       | 77.76  | 102.14 | 94.06  | 84.77  |
| hsa-miR-376a-5p | MIMAT0003386 | GUAGAUUCUCCUUCUAUGAGUA     | 104.10 | 94.86  | 84.07  | 96.59  |
| hsa-miR-376b-3p | MIMAT0002172 | AUCAUAGAGGAAAUCCAUGUU      | 111.64 | 104.67 | 102.79 | 87.26  |
| hsa-miR-376c-3p | MIMAT0000720 | AACAUAGAGGAAAUCCACGU       | 86.18  | 69.76  | 82.27  | 67.03  |
| hsa-miR-377-3p  | MIMAT0000730 | AUCACACAAAGGCAACUUUUGU     | 98.23  | 106.76 | 93.14  | 109.20 |
| hsa-miR-377-5p  | MIMAT0004689 | AGAGGUUGCCCUUGGUGAAUUC     | 57.65  | 56.03  | 76.09  | 69.78  |
| hsa-miR-378a-3p | MIMAT0000732 | ACUGGACUUGGAGUCAGAAGG      | 105.43 | 116.51 | 111.95 | 112.54 |
| hsa-miR-378a-5p | MIMAT0000731 | CUCCUGACUCCAGGUCCUGUGU     | 76.95  | 105.18 | 98.12  | 106.33 |
| hsa-miR-378b    | MIMAT0014999 | ACUGGACUUGGAGGCAGAA        | 135.51 | 142.06 | 125.60 | 133.26 |
| hsa-miR-378c    | MIMAT0016847 | ACUGGACUUGGAGUCAGAAGAGUGG  | 106.30 | 91.63  | 101.17 | 110.82 |
| hsa-miR-379-3p  | MIMAT0004690 | UAUGUAACAUGGUCCACUAACU     | 122.50 | 136.81 | 102.48 | 102.16 |
| hsa-miR-379-5p  | MIMAT0000733 | UGGUAGACUAUGGAACGUAGG      | 98.45  | 88.91  | 69.61  | 60.31  |
| hsa-miR-380-3p  | MIMAT0000735 | UAUGUAAUAUGGUCCACAUCUU     | 82.26  | 82.76  | 97.85  | 94.58  |
| hsa-miR-380-5p  | MIMAT0000734 | UGGUUGACCAUAGAACAUGCGC     | 65.49  | 58.77  | 134.01 | 130.53 |
| hsa-miR-381-3p  | MIMAT0000736 | UAUACAAGGGCAAGCUCUCUGU     | 104.62 | 91.26  | 126.82 | 110.46 |
| hsa-miR-382-5p  | MIMAT0000737 | GAAGUUGUUCGUGGUGGAUUCG     | 97.14  | 87.75  | 102.56 | 98.51  |
| hsa-miR-383     | MIMAT0000738 | AGAUCAGAAGGUGAUUGUGGCU     | 49.96  | 61.66  | 125.15 | 132.29 |
| hsa-miR-384     | MIMAT0001075 | AUUCCUAGAAAUUGUUCAUA       | 92.00  | 117.16 | 74.67  | 84.91  |
| hsa-miR-3907    | MIMAT0018179 | AGGUGCUCAGGCUGGCUCACA      | 49.80  | 49.98  | 81.21  | 88.26  |
| hsa-miR-3908    | MIMAT0018182 | GAGCAAUGUAGGUAGACUGUUU     | 71.96  | 89.05  | 96.39  | 73.13  |
| hsa-miR-3909    | MIMAT0018183 | UGUCCUCUAGGGCCUGCAGUCU     | 126.95 | 142.06 | 80.80  | 85.00  |
| hsa-miR-3910    | MIMAT0018184 | AAAGGCAUAAAACCAAGACA       | 81.97  | 61.29  | 81.32  | 99.55  |
| hsa-miR-3911    | MIMAT0018185 | UGUGUGGAUCCUGGAGGAGGCA     | 73.21  | 57.48  | 97.33  | 106.98 |
| hsa-miR-3912    | MIMAT0018186 | UAACGCAUAAUAUGGACAUGU      | 96.86  | 118.84 | 86.55  | 116.34 |
| hsa-miR-3913-5p | MIMAT0018187 | UUUGGGACUGAUCUUGAUGUCU     | 125.31 | 115.46 | 108.72 | 103.35 |
| hsa-miR-3914    | MIMAT0018188 | AAGGAACCAGAAAUGAGAAGU      | 119.95 | 112.63 | 105.04 | 120.32 |
| hsa-miR-3915    | MIMAT0018189 | UUGAGGAAAAGAUGGUCUUUU      | 97.89  | 101.57 | 93.08  | 90.55  |
| hsa-miR-3916    | MIMAT0018190 | AAGAGGAAGAAAUGGCUGGUUCUCAG | 74.50  | 90.71  | 106.23 | 122.56 |
| hsa-miR-3917    | MIMAT0018191 | GCUCGGACUGAGCAGGUGGG       | 107.79 | 93.61  | 101.73 | 123.09 |
| hsa-miR-3918    | MIMAT0018192 | ACAGGGCCGCAGAUGGAGACU      | 72.78  | 87.36  | 91.69  | 85.87  |
| hsa-miR-3919    | MIMAT0018193 | GCAGAGAACAAAGGACUCAGU      | 78.10  | 71.66  | 86.92  | 107.97 |
| hsa-miR-3920    | MIMAT0018195 | ACUGAUUAUCUUAACUCUCUGA     | 123.81 | 122.45 | 103.97 | 83.26  |
| hsa-miR-3921    | MIMAT0018196 | UCUCUGAGUACCAUAUGCCUUGU    | 82.51  | 103.53 | 98.95  | 105.67 |
| hsa-miR-3922-3p | MIMAT0018197 | UCUGGCCUUGACUUGACUCUUU     | 75.55  | 116.04 | 105.33 | 80.17  |
| hsa-miR-3923    | MIMAT0018198 | AACUAGUAAUGUUGGAUUAGGG     | 86.15  | 79.32  | 98.84  | 102.15 |
| hsa-miR-3924    | MIMAT0018199 | AUAUGUAUAUGUGACUGCUACU     | 107.57 | 88.52  | 92.16  | 84.36  |
| hsa-miR-3925-5p | MIMAT0018200 | AAGAGAACUGAAAGUGGAGCCU     | 87.28  | 90.12  | 117.40 | 99.17  |

|                 |              |                         |        |        |        |        |
|-----------------|--------------|-------------------------|--------|--------|--------|--------|
| hsa-miR-3926    | MIMAT0018201 | UGGCCAAAAAGCAGGCAGAGA   | 116.71 | 119.00 | 97.29  | 112.80 |
| hsa-miR-3927-3p | MIMAT0018202 | CAGGUAGAUUUUGAUAGGCAU   | 96.95  | 90.95  | 82.26  | 92.53  |
| hsa-miR-3928    | MIMAT0018205 | GGAGGAACCUUGGAGCUUCGGC  | 83.26  | 101.94 | 101.73 | 94.20  |
| hsa-miR-3929    | MIMAT0018206 | GAGGCUGAUGUGAGUAGACCACU | 96.57  | 93.26  | 90.93  | 103.23 |
| hsa-miR-3934-5p | MIMAT0018349 | UCAGGUGUGGAAACUGAGGCAG  | 95.89  | 99.17  | 109.49 | 105.67 |
| hsa-miR-3935    | MIMAT0018350 | UGUAGAUACGAGCACCAGCCAC  | 67.87  | 59.83  | 77.45  | 69.89  |
| hsa-miR-3936    | MIMAT0018351 | UAAGGGGUGUAUGGCAGAUGCA  | 83.79  | 96.86  | 84.61  | 106.26 |
| hsa-miR-3937    | MIMAT0018352 | ACAGGCGGCUGUAGCAAUGGGGG | 89.12  | 117.65 | 103.25 | 89.91  |
| hsa-miR-3938    | MIMAT0018353 | AAUUCUUUGUAGAUAAACCCGG  | 94.07  | 116.71 | 90.08  | 90.60  |
| hsa-miR-3939    | MIMAT0018355 | UACGCGCAGACCACAGGAUGUC  | 91.43  | 83.30  | 118.36 | 113.19 |
| hsa-miR-3940-3p | MIMAT0018356 | CAGCCCAGAUCCAGCCACUU    | 131.99 | 111.31 | 103.03 | 123.37 |
| hsa-miR-3941    | MIMAT0018357 | UUACACACAACUGAGGAUCAUA  | 79.70  | 87.38  | 81.24  | 81.18  |
| hsa-miR-3942-5p | MIMAT0018358 | AAGCAAUACUGUUACCUGAAAU  | 86.68  | 94.90  | 93.44  | 87.25  |
| hsa-miR-3943    | MIMAT0018359 | UAGCCCCAGGCUUCACUUGGCG  | 115.78 | 91.67  | 114.53 | 113.65 |
| hsa-miR-3944-3p | MIMAT0018360 | UUCGGGCUGGCCUGCUCUCCGG  | 128.50 | 147.49 | 83.47  | 72.66  |
| hsa-miR-3945    | MIMAT0018361 | AGGGCAUAGGAGAGGGUUGAUAU | 105.11 | 91.67  | 99.33  | 117.54 |
| hsa-miR-409-3p  | MIMAT0001639 | GAAUGUUGCUCGGUGAACCCCU  | 89.12  | 94.64  | 68.91  | 79.01  |
| hsa-miR-409-5p  | MIMAT0001638 | AGGUUACCCGAGCAACUUUGCAU | 101.74 | 98.34  | 91.44  | 94.22  |
| hsa-miR-410     | MIMAT0002171 | AAUUAACACAGAUGGCCUGU    | 86.25  | 78.13  | 120.83 | 119.59 |
| hsa-miR-411-3p  | MIMAT0004813 | UAUGUAACACGGUCCACUAACC  | 113.07 | 110.81 | 118.49 | 112.90 |
| hsa-miR-411-5p  | MIMAT0003329 | UAGUAGACCGUAUAGCGUACG   | 92.18  | 96.39  | 99.51  | 96.18  |
| hsa-miR-412     | MIMAT0002170 | ACUUCACCUGGUCCACUAGCCGU | 117.10 | 74.16  | 69.14  | 75.67  |
| hsa-miR-421     | MIMAT0003339 | AUCAACAGACAUUAAUUGGGCGC | 104.26 | 84.09  | 86.65  | 67.60  |
| hsa-miR-422a    | MIMAT0001339 | ACUGGACUUAGGGUCAGAAGGC  | 132.40 | 119.29 | 143.20 | 146.67 |
| hsa-miR-423-3p  | MIMAT0001340 | AGCUCGGUCUGAGGCCCCUCAGU | 104.04 | 95.64  | 95.89  | 82.26  |
| hsa-miR-423-5p  | MIMAT0004748 | UGAGGGGCAGAGAGCGAGACUUU | 89.15  | 82.78  | 126.58 | 115.28 |
| hsa-miR-424-3p  | MIMAT0004749 | CAAAACGUGAGGCGCUGCUAU   | 74.39  | 67.76  | 121.21 | 120.82 |
| hsa-miR-424-5p  | MIMAT0001341 | CAGCAGCAAUUAUGUUUUGAA   | 81.40  | 85.91  | 86.20  | 83.08  |
| hsa-miR-4251    | MIMAT0016883 | CCUGAGAAAAGGGCCAA       | 121.17 | 108.29 | 82.88  | 100.53 |
| hsa-miR-4252    | MIMAT0016886 | GGCCACUGAGUCAGCACCA     | 89.70  | 83.49  | 101.60 | 112.83 |
| hsa-miR-4253    | MIMAT0016882 | AGGGCAUGUCCAGGGGU       | 63.86  | 50.97  | 96.80  | 80.17  |
| hsa-miR-425-3p  | MIMAT0001343 | AUCGGGAAUGUCGUGUCCGCC   | 85.25  | 77.76  | 97.34  | 77.81  |
| hsa-miR-4254    | MIMAT0016884 | GCCUGGAGCUACUCCACCAUCUC | 88.79  | 68.32  | 81.87  | 81.24  |
| hsa-miR-4255    | MIMAT0016885 | CAGUGUUCAGAGAUGGA       | 81.51  | 84.88  | 110.13 | 101.49 |
| hsa-miR-425-5p  | MIMAT0003393 | AAUGACACGAUCACUCCCGUUGA | 50.61  | 74.16  | 92.31  | 101.25 |
| hsa-miR-4256    | MIMAT0016877 | AUCUGACCUGAUGAAGGU      | 67.19  | 73.75  | 90.24  | 80.42  |
| hsa-miR-4257    | MIMAT0016878 | CCAGAGGUGGGGACUGAG      | 114.60 | 102.85 | 103.96 | 87.77  |
| hsa-miR-4258    | MIMAT0016879 | CCCCGCCACCGCCUUGG       | 92.18  | 86.47  | 87.87  | 102.51 |
| hsa-miR-4259    | MIMAT0016880 | CAGUUGGGUCUAGGGGUCAGGA  | 88.45  | 67.99  | 122.59 | 119.47 |
| hsa-miR-4260    | MIMAT0016881 | CUUGGGGCAUGGAGUCCCA     | 115.22 | 83.30  | 100.62 | 100.53 |
| hsa-miR-4261    | MIMAT0016890 | AGGAAACAGGGACCCA        | 132.67 | 140.53 | 147.55 | 152.13 |

|              |              |                        |        |        |        |        |
|--------------|--------------|------------------------|--------|--------|--------|--------|
| hsa-miR-4262 | MIMAT0016894 | GACAUUCAGACUACCUG      | 102.38 | 119.01 | 90.08  | 92.77  |
| hsa-miR-4263 | MIMAT0016898 | AUUCUAAGUGCCUUGGCC     | 100.80 | 119.86 | 94.67  | 89.41  |
| hsa-miR-4264 | MIMAT0016899 | ACUCAGUCAUGGUCAUU      | 78.10  | 80.70  | 129.08 | 103.92 |
| hsa-miR-4265 | MIMAT0016891 | CUGUGGGCUCAGCUCUGGG    | 51.79  | 67.17  | 116.49 | 117.54 |
| hsa-miR-4266 | MIMAT0016892 | CUAGGAGCCUUGGCC        | 86.83  | 71.63  | 108.65 | 96.14  |
| hsa-miR-4267 | MIMAT0016893 | UCCAGCUCGGUGGCAC       | 93.69  | 89.44  | 69.41  | 76.29  |
| hsa-miR-4268 | MIMAT0016896 | GGCUCCUCCUCUCAGGAUGUG  | 109.22 | 95.01  | 82.76  | 85.15  |
| hsa-miR-4269 | MIMAT0016897 | GCAGGCACAGACAGCCUGGC   | 99.78  | 102.06 | 84.61  | 105.09 |
| hsa-miR-4270 | MIMAT0016900 | UCAGGGAGUCAGGGGAGGGC   | 89.70  | 92.53  | 115.34 | 103.92 |
| hsa-miR-4271 | MIMAT0016901 | GGGGGAAGAAAAGGUGGGG    | 84.61  | 63.63  | 70.70  | 65.87  |
| hsa-miR-4272 | MIMAT0016902 | CAUUCAACUAGUGAUUGU     | 108.92 | 68.53  | 94.99  | 75.29  |
| hsa-miR-4273 | MIMAT0016903 | GUGUUCUCUGAUGGACAG     | 100.35 | 95.60  | 113.92 | 106.07 |
| hsa-miR-4274 | MIMAT0016906 | CAGCAGUCCCUCCCCUG      | 103.59 | 104.29 | 80.69  | 70.84  |
| hsa-miR-4275 | MIMAT0016905 | CCAAUUACCACUUCUUU      | 94.31  | 100.27 | 97.76  | 108.31 |
| hsa-miR-4276 | MIMAT0016904 | CUCAGUGACUCAUGUGC      | 63.86  | 66.15  | 79.73  | 75.88  |
| hsa-miR-4277 | MIMAT0016908 | GCAGUUCUGAGCACAGUACAC  | 87.95  | 84.97  | 88.38  | 98.17  |
| hsa-miR-4278 | MIMAT0016910 | CUAGGGGGUUUGCCUUG      | 80.76  | 68.86  | 89.34  | 94.96  |
| hsa-miR-4279 | MIMAT0016909 | CUCUCCUCCCGGCUUC       | 145.42 | 133.13 | 129.58 | 146.11 |
| hsa-miR-4280 | MIMAT0016911 | GAGUGUAGUUCUGAGCAGAGC  | 111.97 | 119.13 | 102.27 | 114.43 |
| hsa-miR-4281 | MIMAT0016907 | GGGUCCCGGGGAGGGGGG     | 109.68 | 108.00 | 115.02 | 107.81 |
| hsa-miR-4282 | MIMAT0016912 | UAAAAUUUGCAUCCAGGA     | 100.64 | 100.32 | 78.00  | 96.12  |
| hsa-miR-4283 | MIMAT0016914 | UGGGGCUCAGCGAGUUU      | 109.27 | 113.05 | 90.08  | 106.86 |
| hsa-miR-4284 | MIMAT0016915 | GGGCUCACAUCACCCCAU     | 116.91 | 115.06 | 111.99 | 132.55 |
| hsa-miR-4285 | MIMAT0016913 | GCGGCGAGUCCGACUCAU     | 104.07 | 100.75 | 117.25 | 113.19 |
| hsa-miR-4286 | MIMAT0016916 | ACCCACUCCUGGUACC       | 145.18 | 148.60 | 124.41 | 100.02 |
| hsa-miR-4287 | MIMAT0016917 | UCUCCCUUGAGGGCACUUU    | 93.46  | 104.11 | 99.47  | 101.62 |
| hsa-miR-4288 | MIMAT0016918 | UUGUCUGCUGAGUUUCC      | 72.19  | 80.86  | 73.85  | 82.87  |
| hsa-miR-4289 | MIMAT0016920 | GCAUUGUGCAGGGCUAUCA    | 116.75 | 111.36 | 95.52  | 109.93 |
| hsa-miR-429  | MIMAT0001536 | UAAUACUGUCUGGUAAAACCGU | 55.60  | 50.10  | 77.25  | 54.10  |
| hsa-miR-4290 | MIMAT0016921 | UGCCCUCCUUUCUCCUC      | 66.51  | 91.83  | 103.97 | 117.29 |
| hsa-miR-4291 | MIMAT0016922 | UUCAGCAGGAACAGCU       | 78.45  | 92.41  | 84.12  | 106.26 |
| hsa-miR-4292 | MIMAT0016919 | CCCCUGGGCCGGCCUUGG     | 130.76 | 155.15 | 110.90 | 126.01 |
| hsa-miR-4293 | MIMAT0016848 | CAGCCUGACAGGAACAG      | 67.87  | 68.18  | 69.39  | 75.56  |
| hsa-miR-4294 | MIMAT0016849 | GGGAGUCUACAGCAGGG      | 125.63 | 113.84 | 118.91 | 87.86  |
| hsa-miR-4295 | MIMAT0016844 | CAGUGCAAUGUUUCCUU      | 137.45 | 114.79 | 123.87 | 97.44  |
| hsa-miR-4296 | MIMAT0016845 | AUGUGGGCUCAGGCUCA      | 75.55  | 66.15  | 105.33 | 109.67 |
| hsa-miR-4297 | MIMAT0016846 | UGCCUCCUGUCUGUG        | 121.08 | 86.27  | 108.24 | 137.95 |
| hsa-miR-4298 | MIMAT0016852 | CUGGGACAGGAGGAGGCAG    | 126.37 | 110.67 | 131.11 | 123.09 |
| hsa-miR-4299 | MIMAT0016851 | GCUGGUGACAUGAGAGGC     | 121.17 | 129.71 | 93.41  | 112.01 |
| hsa-miR-4300 | MIMAT0016853 | UGGGAGCUGGACUACUUC     | 110.02 | 102.74 | 102.83 | 89.05  |
| hsa-miR-4301 | MIMAT0016850 | UCCCACUACUUCACUUGUGA   | 104.07 | 115.83 | 112.81 | 98.95  |

|                 |              |                           |        |        |        |        |
|-----------------|--------------|---------------------------|--------|--------|--------|--------|
| hsa-miR-4302    | MIMAT0016855 | CCAGUGUGGCUCAGCGAG        | 105.21 | 123.41 | 66.19  | 84.93  |
| hsa-miR-4303    | MIMAT0016856 | UUCUGAGCUGAGGACAG         | 80.28  | 89.25  | 31.88  | 36.02  |
| hsa-miR-4304    | MIMAT0016854 | CCGGCAUGUCCAGGGCA         | 104.02 | 94.62  | 105.87 | 115.26 |
| hsa-miR-4305    | MIMAT0016857 | CCUAGACACCUCCAGUUC        | 69.24  | 86.27  | 99.71  | 82.85  |
| hsa-miR-4306    | MIMAT0016858 | UGGAGAGAAAGGCAGUA         | 81.00  | 62.90  | 92.53  | 100.55 |
| hsa-miR-4307    | MIMAT0016860 | AAUGUUUUUCCUGUUUCC        | 99.34  | 79.64  | 99.25  | 90.75  |
| hsa-miR-4308    | MIMAT0016861 | UCCCUGGAGUUUCUUCUU        | 88.96  | 94.77  | 111.49 | 90.36  |
| hsa-miR-4309    | MIMAT0016859 | CUGGAGUCUAGGAUUCCA        | 86.23  | 83.70  | 101.73 | 94.59  |
| hsa-miR-4310    | MIMAT0016862 | GCAGCAUUCAUGUCCC          | 107.48 | 82.42  | 111.73 | 99.48  |
| hsa-miR-4311    | MIMAT0016863 | GAAAGAGAGCUGAGUGUG        | 105.13 | 105.57 | 111.09 | 111.17 |
| hsa-miR-4312    | MIMAT0016864 | GGCCUUGUCCUGUCCCCA        | 66.28  | 62.63  | 104.02 | 92.29  |
| hsa-miR-4313    | MIMAT0016865 | AGCCCCUGGCCCAAACCC        | 122.86 | 124.31 | 115.82 | 109.18 |
| hsa-miR-431-3p  | MIMAT0004757 | CAGGUCGUCUUGCAGGGCUUCU    | 79.00  | 65.89  | 112.33 | 117.31 |
| hsa-miR-4314    | MIMAT0016868 | CUCUGGGAAAUGGGACAG        | 102.07 | 105.03 | 74.31  | 75.51  |
| hsa-miR-4315    | MIMAT0016866 | CCGCUUUCUGAGCUGGAC        | 93.75  | 95.28  | 117.61 | 85.53  |
| hsa-miR-431-5p  | MIMAT0001625 | UGUCUUGCAGGCCGUCAUGCA     | 74.01  | 53.57  | 98.76  | 84.88  |
| hsa-miR-4316    | MIMAT0016867 | GGUGAGGCUAGCUGGUG         | 29.73  | 76.16  | 93.96  | 81.14  |
| hsa-miR-4317    | MIMAT0016872 | ACAUUGCCAGGGAGUUU         | 95.23  | 112.38 | 100.09 | 95.03  |
| hsa-miR-4318    | MIMAT0016869 | CACUGUGGGUACAUGCU         | 114.25 | 120.62 | 84.61  | 93.80  |
| hsa-miR-4319    | MIMAT0016870 | UCCCUGAGCAAAGCCAC         | 89.02  | 84.88  | 96.87  | 97.03  |
| hsa-miR-4320    | MIMAT0016871 | GGGAUUCUGUAGCUUCCU        | 60.75  | 79.16  | 82.40  | 84.46  |
| hsa-miR-4321    | MIMAT0016874 | UUAGCGGUGGACCGCCUGCG      | 116.14 | 112.44 | 103.96 | 132.55 |
| hsa-miR-4322    | MIMAT0016873 | CUGUGGGCUCAGCGGUGGGG      | 103.84 | 95.01  | 109.07 | 99.86  |
| hsa-miR-4323    | MIMAT0016875 | CAGCCCCACAGCCUCAGA        | 93.46  | 80.25  | 120.27 | 118.78 |
| hsa-miR-432-3p  | MIMAT0002815 | CUGGAUGGCUCUCCAUGUCU      | 119.74 | 129.95 | 127.80 | 98.41  |
| hsa-miR-4324    | MIMAT0016876 | CCCUGAGACCCUAACCUAA       | 119.99 | 121.16 | 102.49 | 100.51 |
| hsa-miR-4325    | MIMAT0016887 | UUGCACUUGUCUCAGUGA        | 81.50  | 93.15  | 96.38  | 112.87 |
| hsa-miR-432-5p  | MIMAT0002814 | UCUUGGAGUAGGUCAUUGGGUGG   | 137.46 | 138.43 | 101.47 | 88.82  |
| hsa-miR-4326    | MIMAT0016888 | UGUCCUCUGUCUCCCAGAC       | 42.06  | 47.72  | 92.00  | 84.46  |
| hsa-miR-4327    | MIMAT0016889 | GGCUUGCAUGGGGGACUGG       | 130.76 | 110.70 | 94.46  | 79.92  |
| hsa-miR-4328    | MIMAT0016926 | CCAGUUUCCCAGGAUU          | 95.66  | 98.78  | 72.21  | 87.93  |
| hsa-miR-4329    | MIMAT0016923 | CCUGAGACCCUAGUCCAC        | 127.11 | 119.40 | 78.44  | 87.47  |
| hsa-miR-433     | MIMAT0001627 | AUCAUGAUGGGCUCCUCGGUGU    | 113.56 | 98.09  | 89.06  | 98.09  |
| hsa-miR-4330    | MIMAT0016924 | CCUCAGAUCAGAGCCUUGC       | 81.77  | 60.69  | 91.75  | 103.70 |
| hsa-miR-448     | MIMAT0001532 | UUGCAUAUGUAGGAUGUCCAU     | 99.73  | 111.45 | 114.07 | 110.13 |
| hsa-miR-449a    | MIMAT0001541 | UGGCAGUGUAUUGUUAGCUGGU    | 21.82  | 27.24  | 45.59  | 62.93  |
| hsa-miR-449b-3p | MIMAT0009203 | CAGCCACAACUACCCUGCCACU    | 103.77 | 94.79  | 131.84 | 107.89 |
| hsa-miR-449b-5p | MIMAT0003327 | AGGCAGUGUAUUGUUAGCUGGC    | 36.17  | 26.71  | 65.57  | 60.88  |
| hsa-miR-449c-3p | MIMAT0013771 | UUGCAGUUGCAGUCCUCUCUGU    | 145.70 | 142.40 | 101.73 | 105.67 |
| hsa-miR-449c-5p | MIMAT0010251 | UAGGCAGUGUAUUGCUAGCGGCUGU | 91.29  | 66.05  | 94.37  | 84.42  |
| hsa-miR-450a-5p | MIMAT0001545 | UUUUGCGAUGUGUCCUAAUUAU    | 169.53 | 177.24 | 156.37 | 178.96 |

|                 |              |                         |        |        |        |        |
|-----------------|--------------|-------------------------|--------|--------|--------|--------|
| hsa-miR-450b-3p | MIMAT0004910 | UUGGGAUCAUUUUGCAUCCAUA  | 95.41  | 92.40  | 98.49  | 107.28 |
| hsa-miR-450b-5p | MIMAT0004909 | UUUUGCAAUAUGUCCUGAAUA   | 36.30  | 34.18  | 86.13  | 94.62  |
| hsa-miR-451a    | MIMAT0001631 | AAACCGUUACCAUUACUGAGUU  | 80.71  | 89.15  | 96.72  | 133.15 |
| hsa-miR-452-3p  | MIMAT0001636 | CUCAUCUGCAAAGAAGUAAGUG  | 86.91  | 92.39  | 101.40 | 84.50  |
| hsa-miR-452-5p  | MIMAT0001635 | AACUGUUUGCAGAGGAAACUGA  | 136.07 | 110.20 | 85.24  | 87.48  |
| hsa-miR-453     | MIMAT0001630 | AGGUUGUCCGUGGUGAGUUCGCA | 102.07 | 99.83  | 116.00 | 128.83 |
| hsa-miR-454-3p  | MIMAT0003885 | UAGUGCAAUAUUGCUUAUAGGGU | 133.80 | 134.07 | 102.83 | 106.86 |
| hsa-miR-454-5p  | MIMAT0003884 | ACCCUAUCAAAUUGUCUCUGC   | 129.91 | 129.36 | 143.18 | 158.56 |
| hsa-miR-455-3p  | MIMAT0004784 | GCAGUCCAUGGGCAUAUACAC   | 129.22 | 126.39 | 86.78  | 115.88 |
| hsa-miR-455-5p  | MIMAT0003150 | UAUGUGCCUUUGGACUACAUCG  | 94.45  | 75.34  | 126.30 | 112.87 |
| hsa-miR-466     | MIMAT0015002 | AUACACAUACACGCAACACACAU | 102.26 | 111.18 | 87.04  | 88.59  |
| hsa-miR-483-3p  | MIMAT0002173 | UCACUCCUCUCCUCCCGUCUU   | 128.29 | 126.11 | 96.63  | 95.38  |
| hsa-miR-483-5p  | MIMAT0004761 | AAGACGGGAGGAAAGAAGGGAG  | 87.08  | 90.20  | 119.87 | 107.38 |
| hsa-miR-484     | MIMAT0002174 | UCAGGCUCAGUCCCCUCCGGAU  | 150.67 | 155.24 | 100.29 | 108.68 |
| hsa-miR-485-3p  | MIMAT0002176 | GUCAUACACGGCUCUCCUCUCU  | 117.43 | 134.25 | 94.49  | 131.44 |
| hsa-miR-485-5p  | MIMAT0002175 | AGAGGCUGGCCGUGAUGAAUUC  | 68.03  | 76.05  | 111.06 | 125.66 |
| hsa-miR-486-3p  | MIMAT0004762 | CGGGGCAGCUCAGUACAGGAU   | 96.58  | 87.82  | 111.05 | 115.17 |
| hsa-miR-486-5p  | MIMAT0002177 | UCCUGUACUGAGCUGCCCCGAG  | 157.32 | 116.04 | 109.60 | 104.30 |
| hsa-miR-487a    | MIMAT0002178 | AAUCAUACAGGGACAUCAGUU   | 101.88 | 117.04 | 95.51  | 92.10  |
| hsa-miR-487b    | MIMAT0003180 | AAUCGUACAGGGUCAUCCACUU  | 137.84 | 139.42 | 114.89 | 120.07 |
| hsa-miR-488-3p  | MIMAT0004763 | UUGAAAGGCUAUUUCUUGGUC   | 109.93 | 95.32  | 102.79 | 110.63 |
| hsa-miR-488-5p  | MIMAT0002804 | CCCAGAUAAUGGCACUCUCAA   | 86.25  | 100.83 | 108.17 | 88.82  |
| hsa-miR-489     | MIMAT0002805 | GUGACAUCACAUAUACGGCAGC  | 115.96 | 87.66  | 107.82 | 93.01  |
| hsa-miR-490-3p  | MIMAT0002806 | CAACCUGGAGGACUCCAUGCUG  | 120.76 | 107.21 | 106.88 | 117.51 |
| hsa-miR-490-5p  | MIMAT0004764 | CCAUGGAUCUCCAGGUGGGU    | 57.96  | 61.77  | 101.37 | 97.88  |
| hsa-miR-491-3p  | MIMAT0004765 | CUUAUGCAAGAUUCCCUUCUAC  | 159.71 | 132.00 | 88.08  | 101.90 |
| hsa-miR-491-5p  | MIMAT0002807 | AGUGGGGAACCCUCCAUGAGG   | 117.07 | 88.40  | 102.32 | 99.78  |
| hsa-miR-492     | MIMAT0002812 | AGGACCUGCGGGACAAGAUUCUU | 92.16  | 105.77 | 95.89  | 109.37 |
| hsa-miR-493-3p  | MIMAT0003161 | UGAAGGUCUACUGUGUGCCAGG  | 153.63 | 201.98 | 117.11 | 123.28 |
| hsa-miR-493-5p  | MIMAT0002813 | UUGUACAUGGUAGGCUUUCAU   | 101.74 | 92.99  | 109.45 | 100.99 |
| hsa-miR-494     | MIMAT0002816 | UGAAACAUACACGGGAAACCUC  | 82.37  | 70.77  | 137.80 | 136.08 |
| hsa-miR-495-3p  | MIMAT0002817 | AAACAAACAUGGUGCACUUCUU  | 92.70  | 86.00  | 102.44 | 81.54  |
| hsa-miR-496     | MIMAT0002818 | UGAGUAUUACAUGGCCAAUCUC  | 105.48 | 110.99 | 120.69 | 107.03 |
| hsa-miR-497-3p  | MIMAT0004768 | CAAACCACACUGUGGUGUUAGA  | 91.66  | 85.42  | 112.75 | 72.08  |
| hsa-miR-497-5p  | MIMAT0002820 | CAGCAGCACACUGUGGUUUGU   | 63.98  | 64.95  | 70.39  | 75.90  |
| hsa-miR-498     | MIMAT0002824 | UUUCAAGCCAGGGGCGUUUUUC  | 62.30  | 70.60  | 96.28  | 109.01 |
| hsa-miR-499a-3p | MIMAT0004772 | AACAUCACAGCAAGUCUGUGCU  | 89.25  | 69.32  | 117.05 | 97.13  |
| hsa-miR-499a-5p | MIMAT0002870 | UUAAGACUUGCAGUGAUGUUU   | 119.13 | 111.85 | 85.46  | 88.41  |
| hsa-miR-500a-3p | MIMAT0002871 | AUGCACCUGGGCAAGGAUUCUG  | 95.38  | 101.98 | 98.84  | 119.47 |
| hsa-miR-500a-5p | MIMAT0004773 | UAAUCCUUGCUACCUGGGUGAGA | 177.47 | 179.25 | 120.91 | 117.15 |
| hsa-miR-500b    | MIMAT0016925 | AAUCCUUGCUACCUGGGU      | 90.69  | 104.32 | 97.29  | 99.74  |

|                  |              |                          |        |        |        |        |
|------------------|--------------|--------------------------|--------|--------|--------|--------|
| hsa-miR-501-3p   | MIMAT0004774 | AAUGCACCCGGGCAAGGAUUCU   | 160.99 | 168.08 | 89.47  | 97.61  |
| hsa-miR-501-5p   | MIMAT0002872 | AAUCCUUUGUCCCUGGGUGAGA   | 113.18 | 101.18 | 86.50  | 92.84  |
| hsa-miR-502-3p   | MIMAT0004775 | AAUGCACCUGGGCAAGGAUUCA   | 85.83  | 87.74  | 120.13 | 121.16 |
| hsa-miR-502-5p   | MIMAT0002873 | AUCCUUGCUAUCUGGGUGCUA    | 82.88  | 82.25  | 77.36  | 80.68  |
| hsa-miR-503-5p   | MIMAT0002874 | UAGCAGCGGGAACAGUUCUGCAG  | 57.78  | 71.44  | 67.78  | 77.43  |
| hsa-miR-504      | MIMAT0002875 | AGACCCUGGUCUGCACUCUAUC   | 83.53  | 86.10  | 105.04 | 95.19  |
| hsa-miR-505-3p   | MIMAT0002876 | CGUCAACACUUGCUGGUUCCU    | 108.66 | 99.59  | 115.06 | 121.02 |
| hsa-miR-505-5p   | MIMAT0004776 | GGGAGCCAGGAAGUAUUGAUGU   | 89.48  | 77.48  | 111.52 | 103.18 |
| hsa-miR-506-3p   | MIMAT0002878 | UAAGGCACCCUUCUGAGUAGA    | 133.97 | 129.18 | 143.52 | 148.45 |
| hsa-miR-507      | MIMAT0002879 | UUUUGCACCUUUUGGAGUGAA    | 58.04  | 68.11  | 78.87  | 76.11  |
| hsa-miR-508-3p   | MIMAT0002880 | UGAUUGUAGCCUUUUGGAGUAGA  | 102.10 | 144.70 | 109.86 | 74.53  |
| hsa-miR-508-5p   | MIMAT0004778 | UACUCCAGAGGGCGUCACUCAUG  | 32.03  | 46.16  | 75.53  | 59.94  |
| hsa-miR-509-3-5p | MIMAT0004975 | UACUGCAGACGUGGCAAUCAUG   | 71.69  | 63.10  | 134.57 | 107.57 |
| hsa-miR-509-3p   | MIMAT0002881 | UGAUUGGUACGUCUGUGGGUAG   | 111.32 | 105.74 | 114.21 | 114.76 |
| hsa-miR-509-5p   | MIMAT0004779 | UACUGCAGACAGUGGCAAUCA    | 35.04  | 32.29  | 129.14 | 130.42 |
| hsa-miR-510      | MIMAT0002882 | UACUCAGGAGAGUGGCAAUCAC   | 36.15  | 43.58  | 87.51  | 115.88 |
| hsa-miR-511      | MIMAT0002808 | GUGUCUUUUGCUCUGCAGUCA    | 139.11 | 125.92 | 116.77 | 97.31  |
| hsa-miR-512-3p   | MIMAT0002823 | AAGUGCUGUCAUAGCUGAGGUC   | 156.83 | 167.92 | 95.63  | 99.30  |
| hsa-miR-512-5p   | MIMAT0002822 | CACUCAGCCUUGAGGGCACUUUC  | 116.50 | 85.27  | 76.32  | 59.02  |
| hsa-miR-513a-3p  | MIMAT0004777 | UAAAUUUCACCUUUCUGAGAAGG  | 121.07 | 100.43 | 107.66 | 69.81  |
| hsa-miR-513a-5p  | MIMAT0002877 | UUCACAGGGAGGUGUCAU       | 73.99  | 79.16  | 85.07  | 83.39  |
| hsa-miR-513b     | MIMAT0005788 | UUCACAAGGAGGUGUCAUUUUAU  | 82.38  | 104.36 | 75.16  | 98.36  |
| hsa-miR-513c-5p  | MIMAT0005789 | UUCUCAAGGAGGUGUCGUUUUAU  | 118.20 | 108.17 | 129.61 | 129.02 |
| hsa-miR-514a-3p  | MIMAT0002883 | AUUGACACUUCUGUGAGUAGA    | 71.42  | 66.15  | 87.06  | 76.14  |
| hsa-miR-514b-3p  | MIMAT0015088 | AUUGACACCUCUGUGAGUGGA    | 89.12  | 99.83  | 82.65  | 87.18  |
| hsa-miR-514b-5p  | MIMAT0015087 | UUCUCAAGAGGGAGGCAAUCAU   | 136.03 | 112.65 | 109.49 | 110.03 |
| hsa-miR-515-3p   | MIMAT0002827 | GAGUGCCUUCUUUUGGAGCGUU   | 174.45 | 173.51 | 119.73 | 118.78 |
| hsa-miR-515-5p   | MIMAT0002826 | UUCUCCAAAAGAAAGCACUUUCUG | 120.57 | 88.57  | 70.82  | 104.45 |
| hsa-miR-516a-3p  | MIMAT0002860 | UGCUCUUUCAGAGGGU         | 98.63  | 99.52  | 94.91  | 113.53 |
| hsa-miR-516a-5p  | MIMAT0004770 | UUCUCGAGGAAAGAAGCACUUUC  | 121.17 | 102.34 | 112.26 | 97.36  |
| hsa-miR-516b-5p  | MIMAT0002859 | AUCUGGAGGUAAGAAGCACUUU   | 118.46 | 94.27  | 75.95  | 67.73  |
| hsa-miR-517-5p   | MIMAT0002851 | CCUCUAGAUGGAAGCACUGUCU   | 122.36 | 98.88  | 103.33 | 107.69 |
| hsa-miR-517a-3p  | MIMAT0002852 | AUCGUGCAUCCUUUAGAGUGU    | 76.44  | 99.01  | 61.60  | 42.38  |
| hsa-miR-517b     | MIMAT0002857 | UCGUGCAUCCUUUAGAGUGUU    | 150.89 | 144.26 | 107.34 | 122.39 |
| hsa-miR-517c-3p  | MIMAT0002866 | AUCGUGCAUCCUUUAGAGUGU    | 87.25  | 85.64  | 128.09 | 105.51 |
| hsa-miR-518a-3p  | MIMAT0002863 | GAAAGCGCUUCCUUUGCUGGA    | 99.79  | 85.50  | 104.04 | 90.63  |
| hsa-miR-518a-5p  | MIMAT0005457 | CUGCAAAGGGAAGCCCUUC      | 22.37  | 17.67  | 59.23  | 41.25  |
| hsa-miR-518b     | MIMAT0002844 | CAAAGCGCUCCCUUUAGAGGU    | 109.27 | 89.65  | 85.65  | 92.22  |
| hsa-miR-518c-3p  | MIMAT0002848 | CAAAGCGCUUCUCUUUAGAGUGU  | 101.10 | 133.28 | 102.83 | 108.05 |
| hsa-miR-518c-5p  | MIMAT0002847 | UCUCUGGAGGGAAGCACUUUCUG  | 107.03 | 91.11  | 95.78  | 97.19  |
| hsa-miR-518d-3p  | MIMAT0002864 | CAAAGCGCUUCCCUUUGGAGC    | 84.89  | 113.87 | 98.93  | 67.30  |

|                 |              |                          |        |        |        |        |
|-----------------|--------------|--------------------------|--------|--------|--------|--------|
| hsa-miR-518d-5p | MIMAT0005456 | CUCUAGAGGGAAGCACUUUCUG   | 144.45 | 145.19 | 120.18 | 127.57 |
| hsa-miR-518e-3p | MIMAT0002861 | AAAGCGCUUCCCUUCAGAGUG    | 116.49 | 98.12  | 118.83 | 117.92 |
| hsa-miR-518e-5p | MIMAT0005450 | CUCUAGAGGGAAGCGCUUUCUG   | 92.67  | 76.46  | 82.22  | 112.60 |
| hsa-miR-518f-3p | MIMAT0002842 | GAAAGCGCUUCUCUUUAGAGG    | 100.65 | 89.88  | 80.88  | 113.61 |
| hsa-miR-518f-5p | MIMAT0002841 | CUCUAGAGGGAAGCACUUUCUC   | 106.81 | 113.45 | 85.45  | 87.29  |
| hsa-miR-519a-3p | MIMAT0002869 | AAAGUGCAUCCUUUUAGAGUGU   | 125.97 | 131.43 | 137.97 | 161.83 |
| hsa-miR-519b-3p | MIMAT0002837 | AAAGUGCAUCCUUUUAGAGGUU   | 134.15 | 120.33 | 115.46 | 124.00 |
| hsa-miR-519c-3p | MIMAT0002832 | AAAGUGCAUCUUUUUAGAGGAU   | 113.20 | 121.58 | 114.13 | 116.31 |
| hsa-miR-519d    | MIMAT0002853 | CAAAGUGCCUCCCUUUAGAGUG   | 80.76  | 86.29  | 124.42 | 114.57 |
| hsa-miR-519e-3p | MIMAT0002829 | AAGUGCCUCCUUUUAGAGUGUU   | 99.19  | 122.33 | 82.26  | 76.10  |
| hsa-miR-519e-5p | MIMAT0002828 | UUCUCCAAAAGGGAGCACUUUC   | 108.53 | 106.16 | 68.25  | 73.52  |
| hsa-miR-520a-3p | MIMAT0002834 | AAAGUGCUUCCCUUUGGACUGU   | 137.73 | 136.43 | 138.20 | 151.71 |
| hsa-miR-520a-5p | MIMAT0002833 | CUCCAGAGGGAAGUACUUUCU    | 37.98  | 45.06  | 83.22  | 78.56  |
| hsa-miR-520b    | MIMAT0002843 | AAAGUGCUUCCUUUUAGAGGG    | 97.08  | 118.93 | 112.27 | 134.03 |
| hsa-miR-520c-3p | MIMAT0002846 | AAAGUGCUUCCUUUUAGAGGGU   | 106.85 | 119.01 | 122.03 | 103.16 |
| hsa-miR-520d-3p | MIMAT0002856 | AAAGUGCUUCUCUUUGGUGGGU   | 166.82 | 203.57 | 132.14 | 136.45 |
| hsa-miR-520d-5p | MIMAT0002855 | CUACAAAGGGAAGCCCUUUC     | 162.63 | 147.31 | 104.33 | 87.81  |
| hsa-miR-520e    | MIMAT0002825 | AAAGUGCUUCCUUUUUGAGGG    | 100.08 | 101.57 | 94.08  | 123.82 |
| hsa-miR-520f    | MIMAT0002830 | AAGUGCUUCCUUUUAGAGGGUU   | 165.34 | 152.49 | 164.35 | 140.85 |
| hsa-miR-520g    | MIMAT0002858 | ACAAAGUGCUUCCCUUUAGAGUGU | 125.60 | 107.31 | 114.13 | 118.77 |
| hsa-miR-520h    | MIMAT0002867 | ACAAAGUGCUUCCCUUUAGAGU   | 78.13  | 84.50  | 89.97  | 88.43  |
| hsa-miR-521     | MIMAT0002854 | AACGCACUUCCCUUUAGAGUGU   | 101.53 | 90.65  | 78.01  | 102.80 |
| hsa-miR-522-3p  | MIMAT0002868 | AAAUGGUUCCCUUUAGAGUGU    | 46.90  | 31.45  | 117.11 | 110.56 |
| hsa-miR-523-3p  | MIMAT0002840 | GAACGCGCUUCCCUAUAGAGGGU  | 101.58 | 100.63 | 115.05 | 107.89 |
| hsa-miR-524-3p  | MIMAT0002850 | GAAGGCGCUUCCCUUUGGAGU    | 62.30  | 63.63  | 81.67  | 92.34  |
| hsa-miR-524-5p  | MIMAT0002849 | CUACAAAGGGAAGCACUUUCUC   | 127.02 | 106.37 | 119.06 | 109.29 |
| hsa-miR-525-3p  | MIMAT0002839 | GAAGGCGCUUCCCUUUAGAGCG   | 93.83  | 117.46 | 116.10 | 141.40 |
| hsa-miR-525-5p  | MIMAT0002838 | CUCCAGAGGGAUGCACUUUCU    | 111.66 | 129.42 | 107.17 | 95.06  |
| hsa-miR-526b-3p | MIMAT0002836 | GAAAGUGCUUCCUUUUAGAGGC   | 176.36 | 184.28 | 86.13  | 110.03 |
| hsa-miR-526b-5p | MIMAT0002835 | CUCUUGAGGGAAGCACUUUCUGU  | 63.86  | 92.18  | 109.07 | 100.01 |
| hsa-miR-532-3p  | MIMAT0004780 | CCUCCACACCCAAGGCUUGCA    | 112.93 | 92.18  | 77.60  | 75.35  |
| hsa-miR-532-5p  | MIMAT0002888 | CAUGCCUUGAGUGUAGGACCGU   | 137.87 | 163.67 | 120.42 | 117.54 |
| hsa-miR-539-5p  | MIMAT0003163 | GGAGAAAUAUCCUUGGUGUGU    | 140.97 | 167.01 | 109.60 | 117.17 |
| hsa-miR-541-3p  | MIMAT0004920 | UGGUGGGCACAGAAUCUGGACU   | 64.74  | 57.94  | 120.81 | 124.53 |
| hsa-miR-541-5p  | MIMAT0004919 | AAAGGAUUCUGCUGUCGGUCCACU | 116.50 | 97.56  | 111.06 | 108.53 |
| hsa-miR-542-3p  | MIMAT0003389 | UGUGACAGAUUGAUACUGAAA    | 58.49  | 67.39  | 81.94  | 95.48  |
| hsa-miR-542-5p  | MIMAT0003340 | UCGGGGAUCAUCAUGUCACGAGA  | 94.13  | 105.24 | 103.09 | 106.62 |
| hsa-miR-543     | MIMAT0004954 | AAACAUUCGCGGUGCACUUCUU   | 88.46  | 128.52 | 103.39 | 101.72 |
| hsa-miR-544a    | MIMAT0003164 | AUUCUGCAUUUUUAGCAAGUUC   | 51.10  | 50.43  | 107.64 | 87.16  |
| hsa-miR-544b    | MIMAT0015004 | ACCUGAGGUUGUGCAUUUCUAA   | 92.43  | 62.61  | 92.60  | 80.02  |
| hsa-miR-545-3p  | MIMAT0003165 | UCAGCAAACAUUUAUUGUGUGC   | 141.67 | 113.87 | 97.44  | 91.55  |

|                 |              |                           |        |        |        |        |
|-----------------|--------------|---------------------------|--------|--------|--------|--------|
| hsa-miR-545-5p  | MIMAT0004785 | UCAGUAAAUGUUUAAUUAGAUGA   | 87.58  | 97.14  | 68.67  | 75.43  |
| hsa-miR-548a-3p | MIMAT0003251 | CAAAACUGGCAAUUACUUUUGC    | 118.09 | 97.04  | 134.19 | 110.36 |
| hsa-miR-548a-5p | MIMAT0004803 | AAAAGUAAUUGCGAGUUUUACC    | 101.58 | 103.71 | 108.79 | 104.72 |
| hsa-miR-548aa   | MIMAT0018447 | AAAAACCACAAUUACUUUUGCACCA | 63.78  | 75.14  | 102.08 | 104.73 |
| hsa-miR-548b-3p | MIMAT0003254 | CAAGAACCUCAGUUGCUIUUUGU   | 105.89 | 84.06  | 92.80  | 107.03 |
| hsa-miR-548b-5p | MIMAT0004798 | AAAAGUAAUUGUGGUUUUGGCC    | 45.67  | 53.01  | 115.05 | 102.82 |
| hsa-miR-548c-3p | MIMAT0003285 | CAAAAUCUCAUUACUUUUGC      | 97.03  | 74.89  | 99.24  | 83.90  |
| hsa-miR-548c-5p | MIMAT0004806 | AAAAGUAAUUGCGGUUUUUGCC    | 68.64  | 69.55  | 113.10 | 123.73 |
| hsa-miR-548d-3p | MIMAT0003323 | CAAAAACCACAGUUUCUUUUGC    | 116.12 | 111.10 | 96.20  | 115.00 |
| hsa-miR-548d-5p | MIMAT0004812 | AAAAGUAAUUGUGGUUUUUGCC    | 113.16 | 113.11 | 77.21  | 86.91  |
| hsa-miR-548e    | MIMAT0005874 | AAAAACUGAGACUACUUUUGCA    | 145.78 | 153.49 | 110.18 | 119.82 |
| hsa-miR-548f    | MIMAT0005895 | AAAAACUGUAAUUACUUUU       | 124.25 | 108.41 | 106.76 | 94.04  |
| hsa-miR-548g-3p | MIMAT0005912 | AAAACUGUAAUUACUUUUGUAC    | 105.04 | 105.26 | 74.24  | 91.18  |
| hsa-miR-548h-5p | MIMAT0005928 | AAAAGUAAUCGCGGUUUUUGUC    | 94.87  | 111.85 | 97.00  | 96.21  |
| hsa-miR-548i    | MIMAT0005935 | AAAAGUAAUUGCGGAUUUUGCC    | 124.92 | 105.03 | 110.61 | 107.81 |
| hsa-miR-548j    | MIMAT0005875 | AAAAGUAAUUGCGGUCUUUGGU    | 86.87  | 84.89  | 83.43  | 76.72  |
| hsa-miR-548k    | MIMAT0005882 | AAAAGUACUUGCGGAUUUUGCU    | 87.44  | 83.31  | 121.86 | 127.96 |
| hsa-miR-548l    | MIMAT0005889 | AAAAGUAAUUGCGGGUUUUGUC    | 89.33  | 97.14  | 100.34 | 116.48 |
| hsa-miR-548m    | MIMAT0005917 | CAAAGGUAUUUGUGGUUUUUG     | 138.79 | 137.26 | 117.45 | 105.50 |
| hsa-miR-548n    | MIMAT0005916 | CAAAGUAAUUGUGGAUUUUGU     | 69.21  | 64.79  | 114.78 | 124.00 |
| hsa-miR-548o-3p | MIMAT0005919 | CCAAAACUGCAGUUACUUUUGC    | 115.90 | 131.30 | 108.92 | 119.18 |
| hsa-miR-548p    | MIMAT0005934 | UAGCAAAAACUGCAGUUACUUU    | 53.83  | 46.66  | 111.03 | 92.61  |
| hsa-miR-548q    | MIMAT0011163 | GCUGGUGCAAAAGUAAUGGCGG    | 107.40 | 119.13 | 116.49 | 121.05 |
| hsa-miR-548s    | MIMAT0014987 | AUGGCCAAAACUGCAGUUUUUUU   | 88.97  | 92.06  | 92.33  | 103.68 |
| hsa-miR-548t-5p | MIMAT0015009 | CAAAGUGAUCGUGGUUUUUG      | 129.26 | 134.97 | 74.13  | 100.27 |
| hsa-miR-548u    | MIMAT0015013 | CAAAGACUGCAAUUACUUUUGCG   | 37.60  | 43.57  | 92.51  | 111.74 |
| hsa-miR-548v    | MIMAT0015020 | AGCUACAGUUACUUUUGCACCA    | 114.94 | 119.66 | 105.87 | 112.02 |
| hsa-miR-548w    | MIMAT0015060 | AAAAGUAAACUGCGGUUUUUGCCU  | 126.02 | 110.08 | 104.02 | 116.45 |
| hsa-miR-548x    | MIMAT0015081 | UAAAACUGCAAUUACUUUCA      | 91.77  | 90.27  | 85.77  | 104.51 |
| hsa-miR-548y    | MIMAT0018354 | AAAAGUAAUCACUGUUUUUGCC    | 126.17 | 116.38 | 136.58 | 121.78 |
| hsa-miR-548z    | MIMAT0018446 | CAAAAACCGCAAUUACUUUUGCA   | 88.46  | 93.25  | 109.52 | 99.01  |
| hsa-miR-549a    | MIMAT0003333 | UGACAACUAUGGAUGAGCUCU     | 93.20  | 119.07 | 75.75  | 82.51  |
| hsa-miR-550a-3p | MIMAT0003257 | UGUCUUACUCCUCAGGCACAU     | 85.49  | 106.31 | 115.03 | 104.09 |
| hsa-miR-550a-5p | MIMAT0004800 | AGUGCCUGAGGGAGUAAGAGCCC   | 93.78  | 106.37 | 81.72  | 85.83  |
| hsa-miR-550b-3p | MIMAT0018445 | UCUUACUCCUCAGGCACUG       | 116.06 | 77.66  | 98.69  | 71.76  |
| hsa-miR-551a    | MIMAT0003214 | GCGACCCACUCUUGGUUUCCA     | 134.06 | 119.13 | 126.79 | 127.27 |
| hsa-miR-551b-3p | MIMAT0003233 | GCGACCCAUAUCUUGGUUUCAG    | 120.80 | 124.02 | 125.47 | 120.36 |
| hsa-miR-551b-5p | MIMAT0004794 | GAAAUCAAGCGUGGGUGAGACC    | 110.44 | 119.87 | 89.52  | 80.18  |
| hsa-miR-552     | MIMAT0003215 | AACAGGUGACUGGUUAGACAA     | 54.23  | 63.07  | 68.29  | 80.92  |
| hsa-miR-553     | MIMAT0003216 | AAAACGGUGAGAUUUUGUUUU     | 145.63 | 121.75 | 117.24 | 96.63  |
| hsa-miR-554     | MIMAT0003217 | GCUAGUCCUGACUCAGCCAGU     | 71.42  | 99.95  | 88.43  | 97.82  |

|                |              |                          |        |        |        |        |
|----------------|--------------|--------------------------|--------|--------|--------|--------|
| hsa-miR-555    | MIMAT0003219 | AGGGUAAGCUGAACCUCUGAU    | 98.26  | 117.65 | 114.53 | 119.88 |
| hsa-miR-556-3p | MIMAT0004793 | AUAUUACCAUUAGCUCAUCUUU   | 166.97 | 214.59 | 139.64 | 151.56 |
| hsa-miR-556-5p | MIMAT0003220 | GAUGAGCUCAUUGUAAUAUGAG   | 71.76  | 83.73  | 105.94 | 112.97 |
| hsa-miR-557    | MIMAT0003221 | GUUUGCACGGGUGGGCCUUGUCU  | 81.77  | 80.92  | 107.82 | 92.22  |
| hsa-miR-558    | MIMAT0003222 | UGAGCUGCUGUACCAAAAU      | 94.20  | 83.14  | 94.27  | 91.42  |
| hsa-miR-559    | MIMAT0003223 | UAAAGUAAAUAUGCACCAAAA    | 105.62 | 90.38  | 132.43 | 114.57 |
| hsa-miR-561-3p | MIMAT0003225 | CAAAGUUUAAGAUCUUGAAGU    | 122.98 | 103.15 | 117.76 | 116.60 |
| hsa-miR-562    | MIMAT0003226 | AAAGUAGCUGUACCAUUUGC     | 102.21 | 78.40  | 115.49 | 129.94 |
| hsa-miR-563    | MIMAT0003227 | AGGUUGACAUACGUUCCC       | 106.18 | 95.35  | 143.68 | 126.54 |
| hsa-miR-564    | MIMAT0003228 | AGGCACGGUGUCAGCAGGC      | 100.47 | 118.21 | 103.73 | 101.09 |
| hsa-miR-566    | MIMAT0003230 | GGGCGCCUGUGAUCCCAAC      | 113.13 | 108.91 | 104.51 | 92.30  |
| hsa-miR-567    | MIMAT0003231 | AGUAUGUUCUCCAGGACAGAAC   | 117.48 | 89.11  | 121.89 | 106.66 |
| hsa-miR-568    | MIMAT0003232 | AUGUAUAAAUGUAUACACAC     | 94.24  | 94.35  | 99.47  | 114.49 |
| hsa-miR-569    | MIMAT0003234 | AGUUA AUGAAUCCUGGAAAGU   | 81.25  | 81.01  | 67.65  | 99.76  |
| hsa-miR-570-3p | MIMAT0003235 | CGAAAACAGCAAUUACCUUUGC   | 49.76  | 66.94  | 71.24  | 77.34  |
| hsa-miR-571    | MIMAT0003236 | UGAGUUGCCAUCUGAGUGAG     | 107.67 | 78.40  | 118.41 | 120.47 |
| hsa-miR-572    | MIMAT0003237 | GUCCGCUCGGCGGUGGCCCA     | 88.36  | 77.57  | 103.25 | 103.53 |
| hsa-miR-573    | MIMAT0003238 | CUGAAGUGAUGUGUAACUGAUCAG | 136.29 | 125.80 | 125.60 | 133.26 |
| hsa-miR-574-3p | MIMAT0003239 | CACGCUCAUGCACACACCACA    | 113.10 | 125.65 | 94.22  | 100.65 |
| hsa-miR-574-5p | MIMAT0004795 | UGAGUGUGUGUGUGAGUGUGU    | 103.66 | 110.34 | 119.31 | 99.30  |
| hsa-miR-575    | MIMAT0003240 | GAGCCAGUUGGACAGGAGC      | 101.05 | 119.30 | 104.48 | 125.53 |
| hsa-miR-576-3p | MIMAT0004796 | AAGAUGUGGAAAAAUUGGAAUC   | 99.52  | 77.80  | 108.49 | 113.36 |
| hsa-miR-576-5p | MIMAT0003241 | AUUCUAAUUUCUCCACGUCUUU   | 121.62 | 139.37 | 98.94  | 119.51 |
| hsa-miR-577    | MIMAT0003242 | UAGAUAAAUAUUGGUACCUG     | 129.01 | 118.23 | 118.17 | 106.30 |
| hsa-miR-578    | MIMAT0003243 | CUUCUUGUGCUCUAGGAUUGU    | 36.24  | 25.42  | 92.55  | 96.92  |
| hsa-miR-579    | MIMAT0003244 | UUCAUUUGUAUAAACCGCGAUU   | 119.91 | 101.82 | 88.83  | 78.31  |
| hsa-miR-580    | MIMAT0003245 | UUGAGAAUGAUGAAUCAUUAGG   | 84.13  | 110.29 | 83.34  | 77.92  |
| hsa-miR-581    | MIMAT0003246 | UCUUGUGUUCUCUAGAUCAGU    | 119.23 | 95.48  | 112.77 | 117.65 |
| hsa-miR-582-3p | MIMAT0004797 | UAACUGGUUGAACCAACUGAAC   | 99.16  | 114.48 | 91.38  | 110.64 |
| hsa-miR-582-5p | MIMAT0003247 | UUACAGUUGUUCAACCAGUUACU  | 189.17 | 216.00 | 73.30  | 89.05  |
| hsa-miR-583    | MIMAT0003248 | CAAAGAGGAAGGUCCAUUAC     | 114.94 | 109.23 | 91.18  | 92.58  |
| hsa-miR-584-5p | MIMAT0003249 | UUAUGGUUUGCCUGGGACUGAG   | 69.99  | 68.86  | 79.47  | 76.33  |
| hsa-miR-585    | MIMAT0003250 | UGGCGUAUCUGUAUGCUA       | 98.12  | 86.08  | 97.84  | 127.84 |
| hsa-miR-586    | MIMAT0003252 | UAUGCAUUGUAUUUUUAGGUCC   | 134.76 | 154.64 | 101.47 | 113.44 |
| hsa-miR-587    | MIMAT0003253 | UUUCCAUAGGUGAUGAGUCAC    | 106.78 | 108.51 | 89.13  | 67.39  |
| hsa-miR-588    | MIMAT0003255 | UUGCCACAAUGGGUAGAAC      | 110.85 | 123.14 | 93.08  | 84.88  |
| hsa-miR-589-3p | MIMAT0003256 | UCAGAACAAAUGCCGUUCCCAGA  | 112.30 | 105.47 | 103.22 | 109.01 |
| hsa-miR-589-5p | MIMAT0004799 | UGAGAACCACGUCUGCUCUGAG   | 96.49  | 83.97  | 91.42  | 97.85  |
| hsa-miR-590-3p | MIMAT0004801 | UAAUUUAUGUAUAAGCUAGU     | 98.12  | 98.37  | 103.94 | 107.26 |
| hsa-miR-590-5p | MIMAT0003258 | GAGCUUAUUCAUAAAAGUGCAG   | 132.32 | 132.09 | 110.04 | 96.57  |
| hsa-miR-591    | MIMAT0003259 | AGACCAUGGGUUCUCAUUGU     | 81.30  | 78.96  | 86.34  | 92.05  |

|                |              |                           |        |        |        |        |
|----------------|--------------|---------------------------|--------|--------|--------|--------|
| hsa-miR-592    | MIMAT0003260 | UUGUGUCAAAUAUGCGAUGAUGU   | 119.44 | 112.16 | 111.90 | 120.11 |
| hsa-miR-593-3p | MIMAT0004802 | UGUCUCUGCUGGGGUUUCU       | 87.86  | 115.09 | 109.29 | 96.21  |
| hsa-miR-593-5p | MIMAT0003261 | AGGCACCAGCCAGGCAUUGCUCAGC | 49.59  | 52.20  | 123.81 | 118.36 |
| hsa-miR-595    | MIMAT0003263 | GAAGUGUGCCGUGGUGUGUCU     | 131.07 | 136.90 | 100.66 | 100.55 |
| hsa-miR-596    | MIMAT0003264 | AAGCCUGCCCGGCUCCUCGGG     | 130.00 | 95.35  | 58.61  | 61.93  |
| hsa-miR-597    | MIMAT0003265 | UGUGUCACUCGAUGACCACUGU    | 178.63 | 153.83 | 66.09  | 85.66  |
| hsa-miR-598    | MIMAT0003266 | UACGUCAUCGUUGUCAUCGUCA    | 117.10 | 111.45 | 99.30  | 80.76  |
| hsa-miR-599    | MIMAT0003267 | GUUGUGUCAGUUUAUCAAAC      | 112.18 | 124.25 | 89.86  | 88.60  |
| hsa-miR-600    | MIMAT0003268 | ACUUACAGACAAGAGCCUUGCUC   | 134.72 | 149.58 | 103.97 | 120.53 |
| hsa-miR-601    | MIMAT0003269 | UGGUCUAGGAUUGUUGGAGGAG    | 92.80  | 94.52  | 86.00  | 106.79 |
| hsa-miR-602    | MIMAT0003270 | GACACGGGCGACAGCUGCGGCC    | 120.85 | 119.45 | 134.62 | 145.56 |
| hsa-miR-603    | MIMAT0003271 | CACACACUGCAAUUACUUUUGC    | 120.21 | 87.86  | 99.24  | 99.90  |
| hsa-miR-604    | MIMAT0003272 | AGGCUGCGGAAUUCAGGAC       | 133.97 | 119.08 | 137.67 | 124.68 |
| hsa-miR-605    | MIMAT0003273 | UAAAUCCCAUGGUGCCUUCUCCU   | 137.68 | 135.98 | 80.57  | 86.13  |
| hsa-miR-606    | MIMAT0003274 | AAACUACUGAAAAUCAAGAU      | 111.50 | 105.12 | 91.75  | 95.78  |
| hsa-miR-607    | MIMAT0003275 | GUUCAAUCCAGAUCUAUAAC      | 90.25  | 97.94  | 94.76  | 111.40 |
| hsa-miR-608    | MIMAT0003276 | AGGGGUGGUGUUGGACAGCUCCGU  | 41.01  | 42.25  | 125.30 | 122.49 |
| hsa-miR-609    | MIMAT0003277 | AGGGUGUUUCUCUCAUCUCU      | 81.87  | 88.57  | 100.80 | 124.03 |
| hsa-miR-610    | MIMAT0003278 | UGAGCUAAAUGUGUGCUGGGA     | 167.45 | 190.86 | 124.00 | 131.65 |
| hsa-miR-611    | MIMAT0003279 | GCGAGGACCCUCGGGGUCUGAC    | 116.54 | 120.62 | 115.02 | 95.75  |
| hsa-miR-612    | MIMAT0003280 | GCUGGGCAGGGCUUCUGAGCUCCU  | 70.35  | 70.08  | 88.83  | 94.42  |
| hsa-miR-613    | MIMAT0003281 | AGGAAUGUCCUUCUUGCC        | 134.37 | 109.55 | 91.69  | 78.40  |
| hsa-miR-614    | MIMAT0003282 | GAACGCCUGUUCUUGCCAGGUGG   | 89.95  | 112.65 | 119.47 | 113.59 |
| hsa-miR-615-3p | MIMAT0003283 | UCCGAGCCUGGGUCUCCUCUU     | 54.98  | 47.66  | 115.99 | 129.44 |
| hsa-miR-615-5p | MIMAT0004804 | GGGGGUCCCCGGUGCUCGGAUC    | 120.93 | 121.01 | 99.79  | 99.48  |
| hsa-miR-616-3p | MIMAT0004805 | AGUCAUUGGAGGGUUUGAGCAG    | 132.32 | 115.43 | 123.90 | 115.96 |
| hsa-miR-616-5p | MIMAT0003284 | ACUCAAAACCCUUCAGUGACUU    | 118.77 | 112.40 | 117.82 | 94.15  |
| hsa-miR-617    | MIMAT0003286 | AGACUCCCAUUUGAAGGUGGC     | 45.95  | 78.08  | 83.47  | 80.71  |
| hsa-miR-618    | MIMAT0003287 | AAACUCUACUUGUCCUUCUGAGU   | 97.03  | 108.61 | 85.83  | 105.64 |
| hsa-miR-619    | MIMAT0003288 | GACCUGGACAUGUUUGUGCCCAGU  | 118.19 | 125.35 | 83.43  | 123.09 |
| hsa-miR-620    | MIMAT0003289 | AUGGAGAUAGAUUAGAAAU       | 121.70 | 89.85  | 96.16  | 92.90  |
| hsa-miR-621    | MIMAT0003290 | GGCUAGCAACAGCGCUUACCU     | 79.47  | 112.01 | 113.45 | 127.01 |
| hsa-miR-622    | MIMAT0003291 | ACAGUCUGCUGAGGUUGGAGC     | 94.45  | 90.18  | 90.50  | 101.59 |
| hsa-miR-623    | MIMAT0003292 | AUCCUUGCAGGGGCGUUGGGU     | 73.99  | 108.45 | 101.60 | 81.24  |
| hsa-miR-624-3p | MIMAT0004807 | CACAAGGUAAUUGGUAUUACCU    | 84.73  | 97.65  | 104.54 | 118.42 |
| hsa-miR-624-5p | MIMAT0003293 | UAGUACCAGUACCUUGUGUUCA    | 92.82  | 83.62  | 134.99 | 126.51 |
| hsa-miR-625-3p | MIMAT0004808 | GACUAUAGAACUUUCCCCUCA     | 110.23 | 109.75 | 102.98 | 112.64 |
| hsa-miR-625-5p | MIMAT0003294 | AGGGGGAAAGUUCUAUAGUCC     | 113.73 | 87.27  | 90.08  | 77.57  |
| hsa-miR-626    | MIMAT0003295 | AGCUGUCUGAAAAUGUCUU       | 87.14  | 87.23  | 95.28  | 90.54  |
| hsa-miR-627    | MIMAT0003296 | GUGAGUCUCUAAGAAAAGAGGA    | 117.60 | 124.17 | 99.75  | 101.53 |
| hsa-miR-628-3p | MIMAT0003297 | UCUAGUAAGAGUGGCAGUCGA     | 94.97  | 91.77  | 100.55 | 96.31  |

|                 |              |                           |        |        |        |        |
|-----------------|--------------|---------------------------|--------|--------|--------|--------|
| hsa-miR-628-5p  | MIMAT0004809 | AUGCUGACAUAUUUACUAGAGG    | 36.17  | 37.29  | 87.81  | 76.46  |
| hsa-miR-629-3p  | MIMAT0003298 | GUUCUCCCAACGUAAGCCCAGC    | 85.17  | 98.23  | 75.40  | 72.00  |
| hsa-miR-629-5p  | MIMAT0004810 | UGGGUUUACGUUGGGAGAACU     | 69.99  | 70.60  | 87.15  | 89.40  |
| hsa-miR-630     | MIMAT0003299 | AGUAUUCUGUACCAGGGAAGGU    | 168.45 | 149.05 | 107.61 | 75.35  |
| hsa-miR-631     | MIMAT0003300 | AGACCUGGCCAGACCUCAGC      | 113.81 | 123.69 | 87.93  | 94.95  |
| hsa-miR-632     | MIMAT0003302 | GUGUCUGCUUCCUGUGGGA       | 107.81 | 106.51 | 76.14  | 107.27 |
| hsa-miR-633     | MIMAT0003303 | CUAAUAGUAUCUACCACAAUAAA   | 86.25  | 85.91  | 92.53  | 82.26  |
| hsa-miR-634     | MIMAT0003304 | AACCAGCACCCAAACUUUGGAC    | 40.19  | 67.38  | 149.97 | 150.99 |
| hsa-miR-635     | MIMAT0003305 | ACUUGGGCACUGAAACAAUGUCC   | 77.40  | 91.11  | 83.02  | 94.48  |
| hsa-miR-636     | MIMAT0003306 | UGUGCUUGCUCGUCCCCGCCGCA   | 123.78 | 106.25 | 103.68 | 92.53  |
| hsa-miR-637     | MIMAT0003307 | ACUGGGGGCUUUCGGGCUCUGCGU  | 85.38  | 84.55  | 95.55  | 114.24 |
| hsa-miR-638     | MIMAT0003308 | AGGGAUCGCGGGCGGUGGGCGGCCU | 81.94  | 90.45  | 108.17 | 99.90  |
| hsa-miR-639     | MIMAT0003309 | AUCGCUCGGUUGCGAGCGCUGU    | 83.07  | 69.73  | 100.30 | 85.15  |
| hsa-miR-640     | MIMAT0003310 | AUGAUCCAGGAACCUGCCUCU     | 91.75  | 77.92  | 98.29  | 80.02  |
| hsa-miR-641     | MIMAT0003311 | AAAGACAUAGGAUAGAGUCACCUC  | 87.68  | 114.19 | 87.51  | 99.53  |
| hsa-miR-642a-5p | MIMAT0003312 | GUCCUCUCCAAAUGUGUCUUG     | 101.22 | 92.81  | 121.46 | 126.07 |
| hsa-miR-642b-3p | MIMAT0018444 | AGACACAUUUGGAGAGGGACCC    | 69.80  | 85.48  | 93.46  | 86.51  |
| hsa-miR-643     | MIMAT0003313 | ACUUGUAUGCUAGCUCAGGUAG    | 137.30 | 103.77 | 89.86  | 103.74 |
| hsa-miR-644a    | MIMAT0003314 | AGUGUGGCUUUCUAGAGC        | 63.07  | 61.89  | 79.84  | 77.96  |
| hsa-miR-645     | MIMAT0003315 | UCUAGGCUGGUACUGCUGA       | 121.16 | 103.71 | 113.91 | 110.43 |
| hsa-miR-646     | MIMAT0003316 | AAGCAGCUGCCUCUGAGGC       | 65.35  | 84.36  | 69.58  | 90.23  |
| hsa-miR-647     | MIMAT0003317 | GUGGCUGCACUCACUCCUUC      | 97.61  | 97.30  | 82.19  | 98.82  |
| hsa-miR-648     | MIMAT0003318 | AAGUGUGCAGGGCACUGGU       | 94.90  | 112.36 | 105.58 | 116.13 |
| hsa-miR-649     | MIMAT0003319 | AAACCUGUGUUGUUCAAGAGUC    | 71.95  | 116.54 | 85.70  | 107.17 |
| hsa-miR-650     | MIMAT0003320 | AGGAGGCAGCGCUCUCAGGAC     | 94.28  | 81.19  | 119.84 | 123.73 |
| hsa-miR-651     | MIMAT0003321 | UUUAGGAUAAGCUUGACUUUUG    | 72.23  | 77.48  | 85.09  | 81.03  |
| hsa-miR-652-3p  | MIMAT0003322 | AAUGGCGCCACUAGGGUUGUG     | 73.10  | 105.15 | 117.80 | 112.21 |
| hsa-miR-653     | MIMAT0003328 | GUGUUGAAACAAUCUCUACUG     | 35.41  | 45.32  | 84.29  | 95.20  |
| hsa-miR-654-3p  | MIMAT0004814 | UAUGUCUGCUGACCAUCACCUU    | 165.29 | 171.83 | 87.06  | 82.51  |
| hsa-miR-654-5p  | MIMAT0003330 | UGGUGGGCCGCAGAACAUUGUC    | 96.31  | 70.55  | 102.90 | 116.48 |
| hsa-miR-655     | MIMAT0003331 | AUAAUACAUGGUUAACCUCUUU    | 37.88  | 35.70  | 76.69  | 62.99  |
| hsa-miR-656     | MIMAT0003332 | AAUAUUUAUCAGUCAACCUCU     | 109.51 | 101.46 | 88.58  | 81.86  |
| hsa-miR-657     | MIMAT0003335 | GGCAGGUUCUCACCCUCUCUAGG   | 103.21 | 113.15 | 103.41 | 131.52 |
| hsa-miR-658     | MIMAT0003336 | GGCGGAGGGAAGUAGGUCCGUUGGU | 98.26  | 102.80 | 115.02 | 104.70 |
| hsa-miR-659-3p  | MIMAT0003337 | CUUGGUUCAGGGAGGGUCCCCA    | 91.72  | 89.94  | 93.27  | 91.50  |
| hsa-miR-660-5p  | MIMAT0003338 | UACCCAUUGCAUAUCGGAGUUG    | 99.82  | 110.59 | 88.72  | 109.69 |
| hsa-miR-661     | MIMAT0003324 | UGCCUGGGUCUCUGGCCUGCGCGU  | 85.17  | 81.37  | 77.64  | 77.33  |
| hsa-miR-662     | MIMAT0003325 | UCCCACGUUGUGGCCAGCAG      | 142.02 | 148.84 | 104.51 | 120.61 |
| hsa-miR-663a    | MIMAT0003326 | AGGCGGGGCGCCGCGGACCGC     | 94.28  | 108.69 | 93.54  | 115.28 |
| hsa-miR-663b    | MIMAT0005867 | GGUGGCCCGGCCGUGCCUGAGG    | 109.04 | 117.53 | 120.75 | 105.99 |
| hsa-miR-664a-3p | MIMAT0005949 | UAUUCAUUUAUCCCCAGCCUACA   | 126.57 | 128.25 | 137.13 | 116.48 |

|                 |              |                             |        |        |        |        |
|-----------------|--------------|-----------------------------|--------|--------|--------|--------|
| hsa-miR-664a-5p | MIMAT0005948 | ACUGGCUAGGGAAAAUGAUUGGAU    | 94.37  | 92.67  | 90.59  | 92.90  |
| hsa-miR-665     | MIMAT0004952 | ACCAGGAGGCUGAGGCCCCU        | 78.74  | 78.19  | 97.22  | 108.24 |
| hsa-miR-668     | MIMAT0003881 | UGUCACUCGGCUCGGCCCACUAC     | 165.38 | 150.52 | 102.71 | 103.56 |
| hsa-miR-670     | MIMAT0010357 | GUCCUGAGUGUAUGUGGUG         | 68.55  | 62.72  | 76.27  | 93.80  |
| hsa-miR-671-3p  | MIMAT0004819 | UCCGGUUCUCAGGGCUCCACC       | 105.48 | 90.56  | 93.37  | 70.21  |
| hsa-miR-671-5p  | MIMAT0003880 | AGGAAGCCUGGAGGGGCGUGGAG     | 109.95 | 112.56 | 103.46 | 84.10  |
| hsa-miR-675-3p  | MIMAT0006790 | CUGUAUGCCUCACCGCUCA         | 88.75  | 121.94 | 77.66  | 69.22  |
| hsa-miR-675-5p  | MIMAT0004284 | UGGUGCGGAGAGGGCCCACAGUG     | 90.28  | 89.87  | 94.29  | 98.64  |
| hsa-miR-676-3p  | MIMAT0018204 | CUGUCCUAAGGUUGUUGAGUU       | 101.25 | 92.18  | 118.13 | 121.46 |
| hsa-miR-676-5p  | MIMAT0018203 | UCUUCAACCUCAGGACUUGCA       | 112.15 | 134.47 | 74.40  | 74.27  |
| hsa-miR-708-3p  | MIMAT0004927 | CAACUAGACUGUGAGCUUCUAG      | 93.41  | 103.93 | 114.80 | 98.90  |
| hsa-miR-708-5p  | MIMAT0004926 | AAGGAGCUUACAAUCUAGCUGGG     | 61.24  | 74.31  | 49.38  | 50.05  |
| hsa-miR-711     | MIMAT0012734 | GGGACCCAGGGAGAGACGUAAG      | 83.84  | 97.62  | 122.59 | 105.74 |
| hsa-miR-7-1-3p  | MIMAT0004553 | CAACAAAUCACAGUCUGCCAU       | 94.57  | 117.88 | 99.91  | 111.71 |
| hsa-miR-718     | MIMAT0012735 | CUUCCGCCCCGCCGGGCGUCG       | 63.19  | 74.97  | 86.20  | 102.11 |
| hsa-miR-720     | MIMAT0005954 | UCUCGCUGGGGCCUCCA           | 141.27 | 151.30 | 92.18  | 113.06 |
| hsa-miR-7-2-3p  | MIMAT0004554 | CAACAAAUCCAGUCUACCUAA       | 54.23  | 63.78  | 86.13  | 58.65  |
| hsa-miR-744-3p  | MIMAT0004946 | CUGUUGCCACUAACCUCUACCU      | 57.82  | 61.09  | 84.11  | 75.93  |
| hsa-miR-744-5p  | MIMAT0004945 | UGCGGGGCUAGGGCUAACAGCA      | 107.81 | 122.87 | 105.94 | 90.05  |
| hsa-miR-758-3p  | MIMAT0003879 | UUUGUGACCUGGUCCACUAACC      | 105.83 | 99.86  | 80.04  | 80.50  |
| hsa-miR-759     | MIMAT0010497 | GCAGAGUGCAAACAAUUUUGAC      | 82.42  | 86.01  | 81.71  | 81.63  |
| hsa-miR-7-5p    | MIMAT0000252 | UGGAAGACUAGUGAUUUUGUUGU     | 110.83 | 135.51 | 134.86 | 155.41 |
| hsa-miR-760     | MIMAT0004957 | CGGCUCUGGGUCUGUGGGGA        | 93.26  | 88.51  | 94.77  | 90.46  |
| hsa-miR-761     | MIMAT0010364 | GCAGCAGGGUGAAACUGACACA      | 94.41  | 114.64 | 106.16 | 95.78  |
| hsa-miR-762     | MIMAT0010313 | GGGGCUGGGGCCGGGGCCGAGC      | 83.84  | 88.91  | 109.07 | 101.17 |
| hsa-miR-764     | MIMAT0010367 | GCAGGUGCUCACUUGUCCUCCU      | 39.51  | 32.29  | 89.52  | 98.47  |
| hsa-miR-765     | MIMAT0003945 | UGGAGGAGAAGGAAGGUGAUG       | 96.26  | 110.60 | 70.10  | 86.99  |
| hsa-miR-766-3p  | MIMAT0003888 | ACUCCAGCCCCACAGCCUCAGC      | 80.97  | 81.03  | 57.97  | 61.65  |
| hsa-miR-767-3p  | MIMAT0003883 | UCUGCUCAUACCCCAUGGUUUCU     | 101.25 | 103.97 | 97.73  | 107.04 |
| hsa-miR-767-5p  | MIMAT0003882 | UGCACCAUGGUUGUCUGAGCAUG     | 68.52  | 44.52  | 101.30 | 94.95  |
| hsa-miR-768-3p  | MIMAT0003947 | UCACAAUGCUGACACUCAACUGCUGAC | 71.40  | 69.62  | 106.92 | 122.69 |
| hsa-miR-768-5p  | MIMAT0003946 | GUUGGAGGAUGAAAGUACGGAGUGAU  | 98.34  | 87.37  | 102.16 | 91.09  |
| hsa-miR-769-3p  | MIMAT0003887 | CUGGGAUCUCCGGGGUCUUGGUU     | 105.62 | 91.73  | 97.34  | 95.00  |
| hsa-miR-769-5p  | MIMAT0003886 | UGAGACCUCUGGGUUCUGAGCU      | 75.82  | 55.14  | 106.71 | 96.57  |
| hsa-miR-770-5p  | MIMAT0003948 | UCCAGUACCACGUGUCAGGGCCA     | 87.59  | 97.61  | 99.33  | 100.81 |
| hsa-miR-801     | MIMAT0004209 | GAUUGCUCUGCGUGCGGAAUCGAC    | 88.20  | 95.78  | 94.28  | 81.16  |
| hsa-miR-802     | MIMAT0004185 | CAGUAACAAAGAUUCAUCCUUGU     | 94.61  | 76.71  | 89.70  | 90.71  |
| hsa-miR-873-5p  | MIMAT0004953 | GCAGGAACUUGUGAGUCUCCU       | 80.07  | 95.50  | 70.08  | 81.67  |
| hsa-miR-874     | MIMAT0004911 | CUGCCCUGGCCCGAGGGACCGA      | 137.68 | 91.52  | 79.84  | 102.48 |
| hsa-miR-875-3p  | MIMAT0004923 | CCUGGAAACACUGAGGUUGUG       | 122.38 | 125.22 | 115.55 | 95.51  |
| hsa-miR-875-5p  | MIMAT0004922 | UAUACCUCAGUUUUUAUCAGGUG     | 37.73  | 43.79  | 101.95 | 83.14  |

|                  |              |                           |        |        |        |        |
|------------------|--------------|---------------------------|--------|--------|--------|--------|
| hsa-miR-876-3p   | MIMAT0004925 | UGGUGGUUUACAAAGUAAUUCA    | 73.85  | 78.13  | 87.32  | 116.72 |
| hsa-miR-876-5p   | MIMAT0004924 | UGGAUUUCUUUGUGAAUCACCA    | 97.12  | 113.45 | 60.51  | 65.37  |
| hsa-miR-877-3p   | MIMAT0004950 | UCCUCUUCUCCCUCCUCCAG      | 117.51 | 100.18 | 102.96 | 99.90  |
| hsa-miR-877-5p   | MIMAT0004949 | GUAGAGGAGAUGGCGCAGGG      | 73.02  | 73.64  | 108.42 | 67.22  |
| hsa-miR-885-3p   | MIMAT0004948 | AGGCAGCGGGGUGUAGUGGAUA    | 57.89  | 61.98  | 86.57  | 84.46  |
| hsa-miR-885-5p   | MIMAT0004947 | UCCAUUACACUACCCUGCCUCU    | 106.79 | 86.32  | 89.21  | 109.80 |
| hsa-miR-886-3p   | MIMAT0004906 | CGCGGGUGCUUACUGACCCUU     | 100.35 | 81.40  | 109.54 | 122.87 |
| hsa-miR-887      | MIMAT0004951 | GUGAACGGGCGCCAUCCCGAGG    | 62.30  | 76.71  | 106.15 | 98.88  |
| hsa-miR-888-3p   | MIMAT0004917 | GACUGACACCUCUUUGGGUGAA    | 108.17 | 115.69 | 92.25  | 78.37  |
| hsa-miR-888-5p   | MIMAT0004916 | UACUCAAAAAGCUGUCAGUCA     | 102.82 | 112.93 | 92.87  | 101.02 |
| hsa-miR-889      | MIMAT0004921 | UUAAUAUCGGACAACCAUUGU     | 72.63  | 67.97  | 93.21  | 87.02  |
| hsa-miR-890      | MIMAT0004912 | UACUUGGAAAGGCAUCAGUUG     | 65.22  | 88.07  | 81.41  | 98.38  |
| hsa-miR-891a     | MIMAT0004902 | UGCAACGAACCUGAGCCACUGA    | 92.67  | 101.13 | 89.47  | 94.62  |
| hsa-miR-891b     | MIMAT0004913 | UGCAACUUACCUGAGUCAUUGA    | 50.33  | 53.01  | 62.65  | 55.22  |
| hsa-miR-892a     | MIMAT0004907 | CACUGUGUCCUUUCUGCGUAG     | 104.75 | 95.86  | 82.90  | 82.43  |
| hsa-miR-892b     | MIMAT0004918 | CACUGGCUCCUUUCUGGGUAGA    | 83.79  | 71.63  | 110.61 | 114.82 |
| hsa-miR-920      | MIMAT0004970 | GGGAGCUGUGGAAGCAGUA       | 93.07  | 123.77 | 88.24  | 77.31  |
| hsa-miR-921      | MIMAT0004971 | CUAGUGAGGGACAGAACCAGGAUUC | 91.53  | 101.11 | 101.03 | 115.22 |
| hsa-miR-922      | MIMAT0004972 | GCAGCAGAGAAUAGGACUACGUC   | 93.52  | 97.60  | 129.61 | 105.75 |
| hsa-miR-923      | MIMAT0004973 | GUCAGCGGAGGAAAAGAAACU     | 118.77 | 89.12  | 128.60 | 112.90 |
| hsa-miR-924      | MIMAT0004974 | AGAGUCUUGUGAUGUCUUGC      | 93.20  | 96.02  | 92.84  | 106.62 |
| hsa-miR-92a-1-5p | MIMAT0004507 | AGGUUGGGAUCGGUUGCAAUGCU   | 108.45 | 114.19 | 97.01  | 109.34 |
| hsa-miR-92a-2-5p | MIMAT0004508 | GGGUGGGGAUUUGUUGCAUAC     | 67.38  | 85.27  | 66.47  | 75.69  |
| hsa-miR-92a-3p   | MIMAT0000092 | UAUUGCACUUGUCCCGGCCUGU    | 48.52  | 38.78  | 93.53  | 93.68  |
| hsa-miR-92b-3p   | MIMAT0003218 | UAUUGCACUCGUCCCGGCCUCC    | 57.25  | 59.50  | 103.66 | 84.91  |
| hsa-miR-92b-5p   | MIMAT0004792 | AGGGACGGGACGCGGUGCAGUG    | 111.46 | 105.36 | 99.51  | 116.88 |
| hsa-miR-933      | MIMAT0004976 | UGUGCGCAGGGAGACCUCUCCC    | 65.24  | 77.59  | 101.95 | 123.13 |
| hsa-miR-93-3p    | MIMAT0004509 | ACUGCUGAGCUAGCACUCCCCG    | 124.65 | 82.27  | 142.11 | 122.47 |
| hsa-miR-934      | MIMAT0004977 | UGUCUACUACUGGAGACACUGG    | 132.53 | 142.14 | 108.65 | 109.76 |
| hsa-miR-935      | MIMAT0004978 | CCAGUUACCGCUUCCGCUACCGC   | 187.10 | 169.72 | 144.41 | 140.35 |
| hsa-miR-93-5p    | MIMAT0000093 | CAAAGUGCUGUUCGUGCAGGUAG   | 86.70  | 83.41  | 116.88 | 130.70 |
| hsa-miR-936      | MIMAT0004979 | ACAGUAGAGGGAGGAAUCGCAG    | 116.68 | 118.78 | 103.33 | 111.71 |
| hsa-miR-937-3p   | MIMAT0004980 | AUCCGCGCUCUGACUCUCUGCC    | 119.13 | 105.37 | 112.64 | 111.38 |
| hsa-miR-938      | MIMAT0004981 | UGCCCUAAAAGGUGAACCCAGU    | 123.02 | 111.39 | 121.89 | 126.93 |
| hsa-miR-939-5p   | MIMAT0004982 | UGGGGAGCUGAGGCUCUGGGGGUG  | 110.59 | 108.45 | 112.27 | 130.58 |
| hsa-miR-9-3p     | MIMAT0000442 | AUAAAGCUAGAUACCGAAAGU     | 107.51 | 105.23 | 100.13 | 105.42 |
| hsa-miR-940      | MIMAT0004983 | AAGGCAGGGCCCCCGCUCCCC     | 77.40  | 57.21  | 96.75  | 119.53 |
| hsa-miR-941      | MIMAT0004984 | CACCCGGCUGUGUGACAUGUGC    | 136.56 | 146.05 | 119.31 | 108.48 |
| hsa-miR-942      | MIMAT0004985 | UCUUCUCUGUUUUGGCCAUGUG    | 111.97 | 110.97 | 90.50  | 78.62  |
| hsa-miR-943      | MIMAT0004986 | CUGACUGUUGCCGUCCUCCAG     | 78.15  | 118.04 | 92.26  | 112.17 |
| hsa-miR-944      | MIMAT0004987 | AAAUUAUUGUACAUCGGAUGAG    | 128.29 | 122.80 | 110.05 | 94.11  |

|                |              |                         |        |        |        |        |
|----------------|--------------|-------------------------|--------|--------|--------|--------|
| hsa-miR-95     | MIMAT0000094 | UUCAACGGGUUUUAUUGAGCA   | 136.14 | 127.26 | 109.80 | 86.46  |
| hsa-miR-9-5p   | MIMAT0000441 | UCUUUGGUUAUCUAGCUGUAUGA | 55.86  | 71.68  | 75.75  | 83.11  |
| hsa-miR-96-3p  | MIMAT0004510 | AAUCAUGUGCAGUGCCAAUAUG  | 100.66 | 77.09  | 116.55 | 104.68 |
| hsa-miR-96-5p  | MIMAT0000095 | UUUGGCACUAGCACAUUUUUGCU | 114.35 | 112.02 | 120.88 | 109.32 |
| hsa-miR-98-5p  | MIMAT0000096 | UGAGGUAGUAAGUUGUAUUGUU  | 22.99  | 38.54  | 68.25  | 57.76  |
| hsa-miR-99a-3p | MIMAT0004511 | CAAGCUCGCUUCUAUGGGUCUG  | 122.63 | 101.32 | 88.53  | 92.63  |
| hsa-miR-99a-5p | MIMAT0000097 | AACCCGUAGAUCCGAUCUUGUG  | 102.71 | 82.64  | 104.46 | 91.93  |
| hsa-miR-99b-3p | MIMAT0004678 | CAAGCUCGUGUCUGUGGGUCCG  | 140.73 | 160.55 | 117.33 | 98.37  |
| hsa-miR-99b-5p | MIMAT0000689 | CACCCGUAGAACCGACCUUGCG  | 116.91 | 134.23 | 93.36  | 101.82 |
